# Supplementary material for: Robotic search for optimal cell culture in regenerative medicine
Source: eLife. 2022 Jun 28;11:e77007. doi: 10.7554/eLife.77007 (PMC9239686; doi:10.7554/eLife.77007)
Supplement: Figure 2—source data 2. — Related to Figure 2E. Raw values of the parameter candidates and pigmentation scores in the baseline experiment. *KSR concentration was lowered in a systematic fashion, unlike the KP parameter. Specific values: DDays 1–3, 20% KSR; DDays 4–7, 15% KSR; from DDay 8, 10% KSR. [file elife-77007-fig2-data2.xlsx]

## Sheet: Sheet1
Figure 2 - Source Data 2
	Plate No.	Well No.	Parameters							Score
			PC	PP	DP	DS	DL	KP	3P
Baseline	1	1	100	6	8	10	S	*	11	0.457
Baseline	2	1	100	6	8	10	S	*	11	0.454
Baseline	3	1	100	6	8	10	S	*	11	0.405
Baseline	4	1	100	6	8	10	S	*	11	0.359
Baseline	5	1	100	6	8	10	S	*	11	0.464
Baseline	6	1	100	6	8	10	S	*	11	0.448
Baseline	7	1	100	6	8	10	S	*	11	0.46
Baseline	8	1	100	6	8	10	S	*	11	0.437
Baseline	1	2	100	6	11	10	S	*	11	0.442
Baseline	2	2	100	6	11	10	S	*	11	0.357
Baseline	3	2	100	6	11	10	S	*	11	0.39
Baseline	4	2	100	6	11	10	S	*	11	0.349
Baseline	5	2	100	6	11	10	S	*	11	0.438
Baseline	6	2	100	6	11	10	S	*	11	0.418
Baseline	7	2	100	6	11	10	S	*	11	0.407
Baseline	8	2	100	6	11	10	S	*	11	0.439
Baseline	1	3	100	6	14	10	S	*	11	0.521
Baseline	2	3	100	6	14	10	S	*	11	0.428
Baseline	3	3	100	6	14	10	S	*	11	0.338
Baseline	4	3	100	6	14	10	S	*	11	0.437
Baseline	5	3	100	6	14	10	S	*	11	0.483
Baseline	6	3	100	6	14	10	S	*	11	0.364
Baseline	7	3	100	6	14	10	S	*	11	0.49
Baseline	8	3	100	6	14	10	S	*	11	0.443
Baseline	1	4	100	6	17	10	S	*	11	0.44
Baseline	2	4	100	6	17	10	S	*	11	0.364
Baseline	3	4	100	6	17	10	S	*	11	0.278
Baseline	4	4	100	6	17	10	S	*	11	0.298
Baseline	5	4	100	6	17	10	S	*	11	0.406
Baseline	6	4	100	6	17	10	S	*	11	0.41
Baseline	7	4	100	6	17	10	S	*	11	0.44
Baseline	8	4	100	6	17	10	S	*	11	0.516
Baseline	1	5	100	6	20	10	S	*	11	0.425
Baseline	2	5	100	6	20	10	S	*	11	0.345
Baseline	3	5	100	6	20	10	S	*	11	0.316
Baseline	4	5	100	6	20	10	S	*	11	0.314
Baseline	5	5	100	6	20	10	S	*	11	0.338
Baseline	6	5	100	6	20	10	S	*	11	0.25
Baseline	7	5	100	6	20	10	S	*	11	0.38
Baseline	8	5	100	6	20	10	S	*	11	0.46
Baseline	1	6	100	6	23	10	S	*	11	0.322
Baseline	2	6	100	6	23	10	S	*	11	0.375
Baseline	3	6	100	6	23	10	S	*	11	0.3
Baseline	4	6	100	6	23	10	S	*	11	0.283
Baseline	5	6	100	6	23	10	S	*	11	0.226
Baseline	6	6	100	6	23	10	S	*	11	0.335
Baseline	7	6	100	6	23	10	S	*	11	0.377
Baseline	8	6	100	6	23	10	S	*	11	0.386
