# Supplementary material for: Robotic search for optimal cell culture in regenerative medicine
Source: eLife. 2022 Jun 28;11:e77007. doi: 10.7554/eLife.77007 (PMC9239686; doi:10.7554/eLife.77007)
Supplement: Figure 2—source data 3. — Related to Figure 2. Given the limitations of the LabDroid, setting the micropipette to an arbitrary volume was difficult. Therefore, we pseudo-implemented a fine volume setting for the transfer of 0–1000 µL by combining nine micropipettes with pre-set volumes (3000, 1000, 450, 300, 200, 80, 30, 10, and 5 µL). The number of combinations was limited to three or fewer. The numbers in the table indicate the micropipettes and the number of times they had to be used to achieve the desired volumes. For example, 260 µL indicates that the 200 and 30 µL micropipettes had to be used once and twice, respectively. [file elife-77007-fig2-data3.xlsx]

## Sheet: Sheet1
Figure 2 - source data 3
Pre-set Volume	Pipette combinations
	3000 µL	1000 µL	450 µL	300 µL	200 µL	80 µL	30 µL	10 µL	5 µL
0	0	0	0	0	0	0	0	0	0
5	0	0	0	0	0	0	0	0	1
10	0	0	0	0	0	0	0	1	0
15	0	0	0	0	0	0	0	1	1
20	0	0	0	0	0	0	0	2	0
25	0	0	0	0	0	0	0	2	1
30	0	0	0	0	0	0	1	0	0
35	0	0	0	0	0	0	1	0	1
40	0	0	0	0	0	0	1	1	0
45	0	0	0	0	0	0	1	1	1
50	0	0	0	0	0	0	1	2	0
60	0	0	0	0	0	0	2	0	0
65	0	0	0	0	0	0	2	0	1
70	0	0	0	0	0	0	2	1	0
80	0	0	0	0	0	1	0	0	0
85	0	0	0	0	0	1	0	0	1
90	0	0	0	0	0	1	0	1	0
95	0	0	0	0	0	1	0	1	1
100	0	0	0	0	0	1	0	2	0
110	0	0	0	0	0	1	1	0	0
115	0	0	0	0	0	1	1	0	1
120	0	0	0	0	0	1	1	1	0
140	0	0	0	0	0	1	2	0	0
160	0	0	0	0	0	2	0	0	0
165	0	0	0	0	0	2	0	0	1
170	0	0	0	0	0	2	0	1	0
190	0	0	0	0	0	2	1	0	0
200	0	0	0	0	1	0	0	0	0
205	0	0	0	0	1	0	0	0	1
210	0	0	0	0	1	0	0	1	0
215	0	0	0	0	1	0	0	1	1
220	0	0	0	0	1	0	0	2	0
230	0	0	0	0	1	0	1	0	0
235	0	0	0	0	1	0	1	0	1
240	0	0	0	0	1	0	1	1	0
260	0	0	0	0	1	0	2	0	0
280	0	0	0	0	1	1	0	0	0
285	0	0	0	0	1	1	0	0	1
290	0	0	0	0	1	1	0	1	0
300	0	0	0	1	0	0	0	0	0
305	0	0	0	1	0	0	0	0	1
310	0	0	0	1	0	0	0	1	0
315	0	0	0	1	0	0	0	1	1
320	0	0	0	1	0	0	0	2	0
330	0	0	0	1	0	0	1	0	0
335	0	0	0	1	0	0	1	0	1
340	0	0	0	1	0	0	1	1	0
360	0	0	0	1	0	0	2	0	0
380	0	0	0	1	0	1	0	0	0
385	0	0	0	1	0	1	0	0	1
390	0	0	0	1	0	1	0	1	0
400	0	0	0	0	2	0	0	0	0
405	0	0	0	0	2	0	0	0	1
410	0	0	0	1	0	1	1	0	0
430	0	0	0	0	2	0	1	0	0
450	0	0	1	0	0	0	0	0	0
455	0	0	1	0	0	0	0	0	1
460	0	0	1	0	0	0	0	1	0
465	0	0	1	0	0	0	0	1	1
470	0	0	1	0	0	0	0	2	0
480	0	0	1	0	0	0	1	0	0
485	0	0	1	0	0	0	1	0	1
490	0	0	1	0	0	0	1	1	0
500	0	0	0	1	1	0	0	0	0
505	0	0	0	1	1	0	0	0	1
510	0	0	1	0	0	0	2	0	0
530	0	0	1	0	0	1	0	0	0
535	0	0	1	0	0	1	0	0	1
540	0	0	1	0	0	1	0	1	0
560	0	0	1	0	0	1	1	0	0
580	0	0	0	1	1	1	0	0	0
600	0	0	0	2	0	0	0	0	0
605	0	0	0	2	0	0	0	0	1
610	0	0	1	0	0	2	0	0	0
630	0	0	0	2	0	0	1	0	0
650	0	0	1	0	1	0	0	0	0
655	0	0	1	0	1	0	0	0	1
660	0	0	1	0	1	0	0	1	0
680	0	0	1	0	1	0	1	0	0
700	0	0	0	1	2	0	0	0	0
730	0	0	1	0	1	1	0	0	0
750	0	0	1	1	0	0	0	0	0
755	0	0	1	1	0	0	0	0	1
760	0	0	1	1	0	0	0	1	0
780	0	0	1	1	0	0	1	0	0
800	0	0	0	2	1	0	0	0	0
830	0	0	1	1	0	1	0	0	0
850	0	0	1	0	2	0	0	0	0
900	0	0	2	0	0	0	0	0	0
905	0	0	2	0	0	0	0	0	1
910	0	0	2	0	0	0	0	1	0
930	0	0	2	0	0	0	1	0	0
950	0	0	1	1	1	0	0	0	0
980	0	0	2	0	0	1	0	0	0
1000	0	1	0	0	0	0	0	0	0
