# Supplementary material for: Robotic search for optimal cell culture in regenerative medicine
Source: eLife. 2022 Jun 28;11:e77007. doi: 10.7554/eLife.77007 (PMC9239686; doi:10.7554/eLife.77007)
Supplement: Figure 4—source data 4. — Related to Figure 4. Raw values of the parameter candidates and pigmentation scores in the experiments from rounds 1 to 3. [file elife-77007-fig4-data4.xlsx]

## Sheet: Sheet1
Figure 4 - Source Data 4
Round No.	Plate No.	Well No.	Parameters							Score
			PC	PP	DP	DS	DL	KP	3P
1	8	1	192.3	5	8	12	S	7	16	0.859
1	4	4	226.7	6	17	18	S	17	9	0.824
1	1	2	203.8	6	11	38	L	5	10	0.769
1	1	3	98	6	14	10	S	8	11	0.629
1	6	1	98	6	8	10	S	8	11	0.6
1	4	6	73.9	6	23	14	L	13	15	0.349
1	8	5	192.3	5	20	39	S	6	4	0.334
1	5	1	249.4	5	8	23	L	8	8	0.303
1	2	1	145.6	4	8	14	S	15	15	0.244
1	3	5	192.3	4	20	71	L	1	19	0.235
1	2	2	505.6	1	11	11	S	17	9	0.197
1	3	4	169.1	6	17	20	S	15	11	0.19
1	1	6	192.3	6	23	24	L	1	11	0.179
1	8	2	243.8	1	11	14	S	4	5	0.167
1	4	2	464.9	6	11	34	L	13	18	0.141
1	3	1	203.8	1	8	26	L	12	5	0.123
1	4	1	86	2	8	10	L	7	8	0.121
1	1	1	24.9	2	8	42	L	15	5	0.109
1	7	2	12.5	2	11	38	S	18	12	0.109
1	8	3	73.9	3	14	85	L	15	10	0.107
1	7	1	116	2	8	29	S	11	13	0.104
1	3	3	18.7	4	14	33	L	10	16	0.089
1	7	5	55.6	3	20	43	S	5	17	0.082
1	6	6	412.8	5	23	14	S	4	17	0.064
1	2	4	18.7	3	17	42	S	12	10	0.063
1	5	3	110	1	14	51	S	5	6	0.061
1	2	3	203.8	3	14	22	L	8	4	0.06
1	4	5	192.3	3	20	71	L	16	11	0.051
1	5	6	37.2	5	23	15	L	16	3	0.041
1	7	6	98	3	23	99	L	12	11	0.04
1	1	4	433.8	1	17	75	L	11	11	0.038
1	7	3	104	2	14	30	L	15	7	0.024
1	8	4	243.8	1	17	100	L	16	12	0.02
1	6	3	305.2	1	14	35	L	3	4	0.01
1	2	6	305.2	3	23	31	L	2	15	0.01
1	6	5	348.8	4	20	87	S	14	19	0.007
1	6	2	370.4	4	11	29	S	10	18	0.006
1	3	2	459.7	1	11	19	S	4	3	0.006
1	4	3	454.6	4	14	19	L	10	14	0.004
1	5	4	305.2	2	17	33	S	2	8	0.001
1	3	6	459.7	5	23	60	S	1	4	0.001
1	5	2	305.2	3	11	35	S	10	17	0.001
1	5	5	459.7	2	20	14	L	16	16	0.001
1	7	4	505.6	4	17	95	S	13	17	0.001
1	8	6	391.7	5	23	16	S	9	14	0.001
1	2	5	485.3	3	20	51	L	9	7	0
1	6	4	459.7	5	17	64	S	5	3	0
2	8	1	192.3	5	8	12	S	7	16	0.827
2	5	1	192.3	6	8	78	L	13	14	0.663
2	4	4	226.7	6	17	18	S	17	9	0.65
2	6	3	198.1	6	14	53	S	4	12	0.608
2	6	4	203.8	6	17	34	S	17	11	0.606
2	7	4	198.1	6	17	33	L	12	8	0.579
2	7	3	198.1	6	14	94	S	14	9	0.551
2	5	5	203.8	6	20	64	L	11	17	0.547
2	5	6	238.1	6	23	13	L	5	17	0.529
2	8	6	226.7	6	23	14	S	12	15	0.518
2	4	6	226.7	6	23	62	L	19	3	0.497
2	7	5	203.8	6	20	52	S	1	18	0.454
2	6	1	192.3	6	8	38	S	10	5	0.435
2	2	3	192.3	6	14	41	L	5	3	0.421
2	3	3	192.3	6	14	32	L	19	7	0.413
2	1	3	192.3	6	14	13	L	11	6	0.36
2	6	2	169.1	6	11	46	L	17	18	0.352
2	3	4	203.8	6	17	75	L	7	6	0.346
2	1	1	169.1	6	8	15	S	8	12	0.343
2	7	1	169.1	6	8	99	L	19	19	0.339
2	3	6	203.8	6	23	96	S	7	7	0.324
2	3	2	169.1	6	11	94	L	16	4	0.31
2	1	6	203.8	6	23	100	L	19	14	0.28
2	6	5	133.8	6	20	54	S	18	3	0.267
2	2	5	192.3	6	20	18	S	5	15	0.259
2	3	1	169.1	6	8	15	L	18	19	0.259
2	7	2	192.3	6	11	66	L	1	10	0.259
2	3	5	192.3	6	20	18	L	14	15	0.241
2	5	4	198.1	6	17	49	S	2	4	0.193
2	8	5	192.3	6	20	16	L	5	4	0.185
2	5	2	169.1	6	11	10	S	4	5	0.181
2	8	2	169.1	6	11	12	L	18	12	0.179
2	2	4	192.3	6	17	15	S	14	5	0.172
2	2	6	203.8	6	23	65	S	19	18	0.172
2	4	5	192.3	6	20	13	L	15	8	0.164
2	2	1	169.1	6	8	57	S	5	6	0.157
2	1	2	169.1	6	11	74	S	19	7	0.148
2	7	6	255	6	23	23	S	18	3	0.146
2	1	5	192.3	6	20	41	L	2	14	0.124
2	1	4	192.3	6	17	88	S	5	18	0.106
2	4	1	169.1	6	8	69	S	15	13	0.089
2	5	3	169.1	6	14	15	L	4	9	0.074
2	2	2	169.1	6	11	100	S	19	19	0.043
2	8	4	122	6	17	38	S	9	19	0.027
2	6	6	169.1	6	23	12	S	5	7	0.011
2	4	2	169.1	6	11	41	S	1	19	0.003
2	4	3	169.1	6	14	17	S	15	15	0.003
2	8	3	169.1	6	14	17	S	1	10	0.003
3	8	4	226.7	5	14	10	L	17	7	0.906
3	7	2	203.8	5	8	10	L	18	11	0.886
3	4	2	203.8	5	8	10	L	18	9	0.884
3	3	5	226.7	6	17	10	L	15	12	0.883
3	7	5	226.7	6	17	10	L	15	11	0.879
3	5	4	226.7	5	14	10	L	17	9	0.866
3	1	5	226.7	6	17	10	L	15	8	0.855
3	4	3	203.8	5	11	10	L	18	10	0.842
3	5	1	203.8	5	5	10	L	18	10	0.828
3	6	2	203.8	5	8	10	L	18	14	0.828
3	8	6	226.7	6	20	75	L	4	11	0.828
3	7	1	203.8	5	5	10	L	18	13	0.825
3	4	5	226.7	6	17	10	L	15	7	0.822
3	3	3	203.8	5	11	10	L	18	8	0.816
3	5	2	192.3	6	8	78	L	13	14	0.815
3	6	4	226.7	5	14	10	L	17	14	0.813
3	3	6	226.7	5	20	10	L	9	18	0.811
3	2	6	226.7	6	20	32	L	1	7	0.81
3	4	6	226.7	5	20	10	L	9	11	0.808
3	2	4	226.7	5	14	10	L	17	12	0.804
3	1	2	203.8	5	8	10	L	18	12	0.793
3	1	1	203.8	5	5	10	L	18	15	0.789
3	3	4	226.7	5	14	10	L	17	18	0.789
3	3	2	203.8	5	8	10	L	18	18	0.788
3	1	3	203.8	5	11	10	L	18	14	0.786
3	5	5	226.7	6	17	10	L	15	16	0.784
3	6	5	226.7	6	17	14	L	13	18	0.779
3	8	2	192.3	5	8	12	S	7	16	0.773
3	3	1	203.8	5	5	10	L	18	19	0.762
3	7	4	226.7	5	14	10	L	17	16	0.761
3	6	6	226.7	6	20	29	L	1	18	0.751
3	2	1	203.8	5	5	10	L	18	9	0.739
3	2	5	226.7	6	17	10	L	15	19	0.726
3	8	1	203.8	5	5	10	L	18	17	0.726
3	5	3	203.8	5	11	10	L	18	16	0.699
3	1	6	226.7	5	20	10	L	9	7	0.679
3	7	3	203.8	5	11	10	L	18	19	0.671
3	4	4	226.7	5	14	10	L	17	6	0.617
3	2	3	203.8	5	11	10	L	18	6	0.537
3	4	1	203.8	5	5	10	L	18	6	0.509
3	6	3	203.8	5	11	10	L	18	5	0.453
3	7	6	226.7	5	20	14	L	7	4	0.453
3	8	3	203.8	5	11	10	L	18	4	0.328
3	5	6	226.7	5	20	10	L	9	4	0.302
3	8	5	226.7	6	17	10	L	15	3	0.064
3	2	2	203.8	5	8	10	L	18	4	0.005
3	6	1	203.8	5	5	10	L	18	3	0.004
3	1	4	226.7	5	14	10	L	17	3	0.002
