# Supplementary material for: Robotic search for optimal cell culture in regenerative medicine
Source: eLife. 2022 Jun 28;11:e77007. doi: 10.7554/eLife.77007 (PMC9239686; doi:10.7554/eLife.77007)
Supplement: Figure 5—source data 2. — Related to Figure 4. Raw values of the parameter candidates and pigmentation scores in the validation experiments. The sample names on the top correspond to Figure 5A. Well numbers 2, 5, and 6 were not subjected to the validation experiments. *Plate numbers 1 and 5 were used for cell biological analysis and were not validated using images. [file elife-77007-fig5-data2.xlsx]

## Sheet: Sheet1
Figure 5 - Source Data 2
	Plate No.	Well No.	Sample name	Parameters							Score
				PC	PP	DP	DS	DL	KP	3P
Validation	1	1	Optimized-3	203.8	5	8	10	L	18	9	*
Validation	1	2	-	-	-	-	-	-	-	-	-
Validation	1	3	Optimized-1	226.7	5	14	10	L	17	7	*
Validation	1	4	Optimized-5	226.7	6	17	10	L	15	11	*
Validation	1	5	-	-	-	-	-	-	-	-	-
Validation	1	6	-	-	-	-	-	-	-	-	-
Validation	2	1	Optimized-2	203.8	5	8	10	L	18	11	0.783
Validation	2	2	-	-	-	-	-	-	-	-	-
Validation	2	3	Optimized-1	226.7	5	14	10	L	17	7	0.614
Validation	2	4	Optimized-4	226.7	6	17	10	L	15	12	0.819
Validation	2	5	-	-	-	-	-	-	-	-	-
Validation	2	6	-	-	-	-	-	-	-	-	-
Validation	3	1	Optimized-3	203.8	5	8	10	L	18	9	0.723
Validation	3	2	-	-	-	-	-	-	-	-	-
Validation	3	3	Pre-optimized	98	6	14	10	S	8	11	0.412
Validation	3	4	Optimized-5	226.7	6	17	10	L	15	11	0.823
Validation	3	5	-	-	-	-	-	-	-	-	-
Validation	3	6	-	-	-	-	-	-	-	-	-
Validation	4	1	Optimized-2	203.8	5	8	10	L	18	11	0.677
Validation	4	2	-	-	-	-	-	-	-	-	-
Validation	4	3	Pre-optimized	98	6	14	10	S	8	11	0.48
Validation	4	4	Optimized-4	226.7	6	17	10	L	15	12	0.767
Validation	4	5	-	-	-	-	-	-	-	-	-
Validation	4	6	-	-	-	-	-	-	-	-	-
Validation	5	1	Optimized-2	203.8	5	8	10	L	18	11	*
Validation	5	2	-	-	-	-	-	-	-	-	-
Validation	5	3	Pre-optimized	98	6	14	10	S	8	11	*
Validation	5	4	Optimized-4	226.7	6	17	10	L	15	12	*
Validation	5	5	-	-	-	-	-	-	-	-	-
Validation	5	6	-	-	-	-	-	-	-	-	-
Validation	6	1	Optimized-3	203.8	5	8	10	L	18	9	0.753
Validation	6	2	-	-	-	-	-	-	-	-	-
Validation	6	3	Optimized-1	226.7	5	14	10	L	17	7	0.7
Validation	6	4	Optimized-5	226.7	6	17	10	L	15	11	0.841
Validation	6	5	-	-	-	-	-	-	-	-	-
Validation	6	6	-	-	-	-	-	-	-	-	-
Validation	7	1	Optimized-3	203.8	5	8	10	L	18	9	0.799
Validation	7	2	-	-	-	-	-	-	-	-	-
Validation	7	3	Pre-optimized	98	6	14	10	S	8	11	0.412
Validation	7	4	Optimized-5	226.7	6	17	10	L	15	11	0.78
Validation	7	5	-	-	-	-	-	-	-	-	-
Validation	7	6	-	-	-	-	-	-	-	-	-
Validation	8	1	Optimized-2	203.8	5	8	10	L	18	11	0.698
Validation	8	2	-	-	-	-	-	-	-	-	-
Validation	8	3	Optimized-1	226.7	5	14	10	L	17	7	0.812
Validation	8	4	Optimized-4	226.7	6	17	10	L	15	12	0.773
Validation	8	5	-	-	-	-	-	-	-	-	-
Validation	8	6	-	-	-	-	-	-	-	-	-
