# Supplementary material for: Robotic search for optimal cell culture in regenerative medicine
Source: eLife. 2022 Jun 28;11:e77007. doi: 10.7554/eLife.77007 (PMC9239686; doi:10.7554/eLife.77007)
Supplement: Figure 5—source data 3. — Related to Figure 5D and E. Raw values of ELISA scores from the validation experiments. [file elife-77007-fig5-data3.xlsx]

## Sheet: Sheet1
Figure 5 - Source Data 3
Protein	Sample name	Protein expression [ng/mL]
		Replicate 1	Replicate 2	Replicate 3	Mean	SEM
VEGF	hiPSC	N.D.	N.D.	N.D.	N.D.	N.D.
	H-RPE	1.43262	1.37781	1.46717	1.42586	0.0260147
	Pre-optimized	6.52785	7.3605	8.33385	7.4074	0.521874
	Optimized-1	4.7649	5.51565	4.77855	5.0197	0.248006
	Optimized-2	7.75215	9.16545	8.6331	8.5169	0.412101
	Optimized-3	8.5575	7.60935	5.7225	7.29645	0.833214
	Optimized-4	6.45015	6.6297	8.7066	7.26215	0.724083
	Optimized-5	6.9237	8.32545	7.27965	7.5096	0.420668
	hiPSC medium	N.D.
	RPE medium	N.D.
PEDF	hiPSC	N.D.	N.D.	N.D.	N.D.	N.D.
	H-RPE	0.36339	0.429589	0.425935	0.406305	0.021483
	Pre-optimized	1.50301	1.41227	1.4141	1.44313	0.0299471
	Optimized-1	1.31331	1.20856	1.31727	1.27971	0.0355941
	Optimized-2	1.74174	1.69911	1.59771	1.67952	0.0427156
	Optimized-3	1.50332	1.33158	1.33858	1.39116	0.0561152
	Optimized-4	1.14096	1.29778	1.32579	1.25484	0.0575129
	Optimized-5	1.25911	1.19608	1.42871	1.29463	0.0694661
	hiPSC medium	N.D.
	RPE medium	N.D.
