# Supplementary material for: Robotic search for optimal cell culture in regenerative medicine
Source: eLife. 2022 Jun 28;11:e77007. doi: 10.7554/eLife.77007 (PMC9239686; doi:10.7554/eLife.77007)
Supplement: Figure 5—source data 5. — List of job names, start times, end times, time required, number of commands, and errors (if any) for all experiments performed by the LabDroid in this study. [file elife-77007-fig5-data5.xlsx]

## Sheet: S6
Figure 5 - source data 5
Experiment	DDay	Run	Category	Plate	Start	End	Duration	Number of commands				Error detail
								Total	Complete	Error	Abort
Baseline	-7	1	Seeding	4 to 1, 8 to 5	2019-02-07 12:22:29	2019-02-07 14:10:28	1:47:59	89	89	0	0	-
Baseline	-6	1	Preconditioning	1 to 4	2019-02-08 15:17:04	2019-02-08 17:48:33	2:31:29	104	104	0	0	-
Baseline	-6	2	Preconditioning	5 to 8	2019-02-08 18:02:44	2019-02-08 20:33:09	2:30:25	104	104	0	0	-
Baseline	-5	1	Preconditioning	8 to 5	2019-02-09 09:00:28	2019-02-09 11:30:37	2:30:09	104	104	0	0	-
Baseline	-5	2	Preconditioning	4 to 1	2019-02-09 11:40:26	2019-02-09 14:10:44	2:30:18	104	104	0	0	-
Baseline	-4	1	Preconditioning	1 to 4	2019-02-10 10:42:05	2019-02-10 13:35:55	2:53:50	104	103	1	0	Microscope error
Baseline	-4	2	Preconditioning	5 to 8	2019-02-10 13:48:43	2019-02-10 16:19:28	2:30:45	104	104	0	0	-
Baseline	-3	1	Preconditioning	8 to 5	2019-02-11 11:33:11	2019-02-11 14:04:12	2:31:01	104	104	0	0	-
Baseline	-3	2	Preconditioning	4 to 1	2019-02-11 15:50:22	2019-02-11 18:21:34	2:31:12	104	104	0	0	-
Baseline	-2	1	Preconditioning	1 to 4	2019-02-12 10:40:20	2019-02-12 13:10:57	2:30:37	104	104	0	0	-
Baseline	-2	2	Preconditioning	5 to 8	2019-02-12 13:23:49	2019-02-12 15:54:23	2:30:34	104	104	0	0	-
Baseline	-1	1	Preconditioning	8 to 5	2019-02-13 11:06:08	2019-02-13 13:36:06	2:29:58	104	104	0	0	-
Baseline	-1	2	Preconditioning	4 to 1	2019-02-13 13:50:46	2019-02-13 16:20:19	2:29:33	104	104	0	0	-
Baseline	0	1	Passage	1 to 4	2019-02-14 10:15:55	2019-02-14 15:58:04	5:42:09	151	151	0	0	-
Baseline	0	2	Passage	5 to 8	2019-02-14 16:44:16	2019-02-14 22:27:46	5:43:30	151	151	0	0	-
Baseline	1	1	RPE differentiation	1 to 4	2019-02-15 12:29:03	2019-02-15 14:59:32	2:30:29	104	104	0	0	-
Baseline	1	2	RPE differentiation	5 to 8	2019-02-15 15:16:55	2019-02-15 17:47:38	2:30:43	104	104	0	0	-
Baseline	2	1	RPE differentiation	8 to 5	2019-02-16 10:57:01	2019-02-16 13:30:10	2:33:09	104	104	0	0	-
Baseline	2	2	RPE differentiation	4 to 1	2019-02-16 13:42:48	2019-02-16 16:12:18	2:29:30	104	104	0	0	-
Baseline	3	1	RPE differentiation	1 to 4	2019-02-17 10:43:56	2019-02-17 13:13:53	2:29:57	104	104	0	0	-
Baseline	3	2	RPE differentiation	5 to 8	2019-02-17 13:25:31	2019-02-17 15:58:21	2:32:50	104	104	0	0	-
Baseline	4	1	RPE differentiation	8 to 5	2019-02-18 10:23:48	2019-02-18 12:56:37	2:32:49	104	104	0	0	-
Baseline	4	2	RPE differentiation	4 to 1	2019-02-18 13:19:30	2019-02-18 15:49:05	2:29:35	104	104	0	0	-
Baseline	5	1	RPE differentiation	1 to 4	2019-02-19 10:52:50	2019-02-19 13:23:47	2:30:57	104	104	0	0	-
Baseline	5	2	RPE differentiation	5 to 8	2019-02-19 13:39:38	2019-02-19 16:11:43	2:32:05	104	104	0	0	-
Baseline	6	1	RPE differentiation	8 to 5	2019-02-20 10:47:01	2019-02-20 13:19:42	2:32:41	104	104	0	0	-
Baseline	6	2	RPE differentiation	4 to 1	2019-02-20 13:30:50	2019-02-20 16:00:53	2:30:03	104	104	0	0	-
Baseline	7	1	RPE differentiation	1 to 4	2019-02-21 11:51:43	2019-02-21 14:22:25	2:30:42	104	104	0	0	-
Baseline	7	2	RPE differentiation	5 to 8	2019-02-21 14:38:16	2019-02-21 17:18:05	2:39:49	104	104	0	0	-
Baseline	8	1	RPE differentiation	8 to 5	2019-02-22 10:51:39	2019-02-22 13:22:00	2:30:21	104	104	0	0	-
Baseline	8	2	RPE differentiation	4 to 1	2019-02-22 13:32:56	2019-02-22 16:02:55	2:29:59	104	104	0	0	-
Baseline	9	1	RPE differentiation	1 to 4	2019-02-23 11:51:10	2019-02-23 14:21:48	2:30:38	104	104	0	0	-
Baseline	9	2	RPE differentiation	5 to 8	2019-02-23 14:32:11	2019-02-23 17:05:01	2:32:50	104	104	0	0	-
Baseline	10	1	RPE differentiation	8 to 5	2019-02-24 11:14:25	2019-02-24 13:47:13	2:32:48	104	104	0	0	-
Baseline	10	2	RPE differentiation	4 to 1	2019-02-24 13:58:19	2019-02-24 16:28:38	2:30:19	104	104	0	0	-
Baseline	11	1	RPE differentiation	1 to 4	2019-02-25 10:25:02	2019-02-25 12:55:03	2:30:01	104	104	0	0	-
Baseline	11	2	RPE differentiation	5 to 8	2019-02-25 13:06:49	2019-02-25 15:38:24	2:31:35	104	104	0	0	-
Baseline	12	1	RPE differentiation	8 to 5	2019-02-26 10:27:07	2019-02-26 12:59:19	2:32:12	104	104	0	0	-
Baseline	12	2	RPE differentiation	4 to 1	2019-02-26 13:11:17	2019-02-26 15:42:55	2:31:38	104	104	0	0	-
Baseline	13	1	RPE differentiation	1 to 4	2019-02-27 10:38:13	2019-02-27 13:32:25	2:54:12	104	103	1	0	Microscope error
Baseline	13	2	RPE differentiation	5 to 8	2019-02-27 13:46:37	2019-02-27 16:23:20	2:36:43	104	103	1	0	Micropipet tip ejection error
Baseline	14	1	RPE differentiation	8 to 5	2019-02-28 10:33:47	2019-02-28 13:07:34	2:33:47	104	102	2	0	Micropipet tip ejection error (x2)
Baseline	14	2	RPE differentiation	4 to 1	2019-02-28 13:21:42	2019-02-28 15:57:03	2:35:21	104	101	3	0	Micropipet tip ejection error (x3)
Baseline	15	1	RPE differentiation	1 to 4	2019-03-01 11:11:44	2019-03-01 13:42:16	2:30:32	104	104	0	0	-
Baseline	15	2	RPE differentiation	5 to 8	2019-03-01 13:53:04	2019-03-01 16:25:28	2:32:24	104	104	0	0	-
Baseline	16	1	RPE differentiation	8 to 5	2019-03-02 11:57:01	2019-03-02 14:27:19	2:30:18	104	104	0	0	-
Baseline	16	2	RPE differentiation	4 to 1	2019-03-02 14:38:14	2019-03-02 17:07:53	2:29:39	104	104	0	0	-
Baseline	17	1	RPE differentiation	1 to 4	2019-03-03 10:37:33	2019-03-03 13:26:30	2:48:57	104	103	1	0	Human error
Baseline	17	2	RPE differentiation	5 to 8	2019-03-03 13:49:29	2019-03-03 16:22:08	2:32:39	104	104	0	0	-
Baseline	18	1	RPE differentiation	8 to 5	2019-03-04 09:00:02	2019-03-04 11:31:58	2:31:56	104	104	0	0	-
Baseline	18	2	RPE differentiation	4 to 1	2019-03-04 12:12:20	2019-03-04 14:45:17	2:32:57	104	104	0	0	-
Baseline	19	1	RPE differentiation	1 to 4	2019-03-05 10:40:30	2019-03-05 13:10:05	2:29:35	104	104	0	0	-
Baseline	19	2	RPE differentiation	5 to 8	2019-03-05 13:23:54	2019-03-05 15:55:27	2:31:33	104	104	0	0	-
Baseline	20	1	RPE differentiation	8 to 5	2019-03-06 10:25:10	2019-03-06 12:13:36	1:48:26	77	77	0	0	-
Baseline	20	2	RPE differentiation	4 to 1	2019-03-06 12:20:49	2019-03-06 15:16:26	2:55:37	77	76	1	0	HDD for microscope PC error
Baseline	21	1	RPE differentiation	1 to 4	2019-03-07 11:17:57	2019-03-07 13:04:43	1:46:46	77	77	0	0	-
Baseline	21	2	RPE differentiation	5 to 8	2019-03-07 13:07:17	2019-03-07 14:55:11	1:47:54	77	77	0	0	-
Baseline	22	1	RPE differentiation	8 to 5	2019-03-08 10:22:27	2019-03-08 12:10:50	1:48:23	77	77	0	0	-
Baseline	22	2	RPE differentiation	4 to 1	2019-03-08 12:15:10	2019-03-08 14:02:38	1:47:28	77	77	0	0	-
Baseline	23	1	RPE differentiation	1 to 4	2019-03-09 10:25:05	2019-03-09 12:12:25	1:47:20	77	77	0	0	-
Baseline	23	2	RPE differentiation	5 to 8	2019-03-09 12:15:54	2019-03-09 14:04:59	1:49:05	77	77	0	0	-
Baseline	24	1	RPE differentiation	8 to 5	2019-03-10 10:38:53	2019-03-10 12:27:04	1:48:11	77	77	0	0	-
Baseline	24	2	RPE differentiation	4 to 1	2019-03-10 12:32:18	2019-03-10 14:19:17	1:46:59	77	77	0	0	-
Baseline	25	1	RPE differentiation	1 to 4	2019-03-11 10:16:04	2019-03-11 12:04:50	1:48:46	77	77	0	0	-
Baseline	25	2	RPE differentiation	5 to 8	2019-03-11 12:07:34	2019-03-11 13:55:20	1:47:46	77	77	0	0	-
Baseline	26	1	RPE maintenance	8 to 5	2019-03-12 10:52:50	2019-03-12 12:40:53	1:48:03	77	77	0	0	-
Baseline	26	2	RPE maintenance	4 to 1	2019-03-12 12:43:34	2019-03-12 14:32:14	1:48:40	77	77	0	0	-
Baseline	28	1	RPE maintenance	1 to 4	2019-03-14 10:28:18	2019-03-14 12:17:38	1:49:20	77	77	0	0	-
Baseline	28	2	RPE maintenance	5 to 8	2019-03-14 12:20:12	2019-03-14 14:11:09	1:50:57	77	77	0	0	-
Baseline	30	1	RPE maintenance	8 to 5	2019-03-16 10:23:16	2019-03-16 12:12:15	1:48:59	77	77	0	0	-
Baseline	30	2	RPE maintenance	4 to 1	2019-03-16 12:14:59	2019-03-16 14:06:20	1:51:21	77	76	1	0	Micropipet tip ejection error
Baseline	32	1	RPE maintenance	1 to 4	2019-03-18 11:30:01	2019-03-18 13:16:22	1:46:21	77	77	0	0	-
Baseline	32	2	RPE maintenance	5 to 8	2019-03-18 13:18:52	2019-03-18 15:06:29	1:47:37	77	77	0	0	-
Round 1	-7	1	Seeding	4 to 1, 8 to 5	2019-04-18 12:39:42	2019-04-18 14:27:46	1:48:04	89	89	0	0	-
Round 1	-6	1	Preconditioning	1 to 4	2019-04-19 13:05:56	2019-04-19 15:36:58	2:31:02	193	193	0	0	-
Round 1	-6	2	Preconditioning	5 to 8	2019-04-19 15:47:38	2019-04-19 18:06:44	2:19:06	193	193	0	0	-
Round 1	-5	1	Preconditioning	8 to 5	2019-04-20 11:18:42	2019-04-20 13:48:48	2:30:06	193	193	0	0	-
Round 1	-5	2	Preconditioning	4 to 1	2019-04-20 14:16:38	2019-04-20 16:59:46	2:43:08	193	192	1	0	Micropipet tip loading error
Round 1	-4	1	Preconditioning	1 to 4	2019-04-21 10:43:17	2019-04-21 13:23:02	2:39:45	193	193	0	0	-
Round 1	-4	2	Preconditioning	5 to 8	2019-04-21 13:35:04	2019-04-21 16:09:11	2:34:07	193	193	0	0	-
Round 1	-3	1	Preconditioning	8 to 5	2019-04-22 10:40:37	2019-04-22 13:19:21	2:38:44	193	193	0	0	-
Round 1	-3	2	Preconditioning	4 to 1	2019-04-22 13:32:35	2019-04-22 16:18:44	2:46:09	193	193	0	0	-
Round 1	-2	1	Preconditioning	1 to 4	2019-04-23 10:53:46	2019-04-23 13:43:26	2:49:40	193	193	0	0	-
Round 1	-2	2	Preconditioning	5 to 8	2019-04-23 13:56:40	2019-04-23 16:42:29	2:45:49	193	193	0	0	-
Round 1	-1	1	Preconditioning	8 to 5	2019-04-24 10:55:04	2019-04-24 13:46:14	2:51:10	193	193	0	0	-
Round 1	-1	2	Preconditioning	4 to 1	2019-04-24 13:59:33	2019-04-24 16:46:11	2:46:38	193	193	0	0	-
Round 1	0	1	Passage	1 to 4	2019-04-25 10:00:39	2019-04-25 15:44:39	5:44:00	151	151	0	0	-
Round 1	0	2	Passage	5 to 8	2019-04-25 16:31:28	2019-04-25 22:14:27	5:42:59	151	151	0	0	-
Round 1	1	1	RPE differentiation	1 to 4	2019-04-26 11:03:13	2019-04-26 14:53:11	3:49:58	335	335	0	0	-
Round 1	1	2	RPE differentiation	5 to 8	2019-04-26 15:14:08	2019-04-26 19:09:21	3:55:13	335	335	0	0	-
Round 1	2	1	RPE differentiation	8 to 5	2019-04-27 10:45:19	2019-04-27 14:38:28	3:53:09	335	335	0	0	-
Round 1	2	2	RPE differentiation	4 to 1	2019-04-27 14:56:29	2019-04-27 18:44:53	3:48:24	335	335	0	0	-
Round 1	3	1	RPE differentiation	1 to 4	2019-04-28 11:06:14	2019-04-28 14:51:31	3:45:17	335	335	0	0	-
Round 1	3	2	RPE differentiation	5 to 8	2019-04-28 15:11:37	2019-04-28 19:00:29	3:48:52	335	335	0	0	-
Round 1	4	1	RPE differentiation	8 to 5	2019-04-29 10:35:44	2019-04-29 14:19:20	3:43:36	335	335	0	0	-
Round 1	4	2	RPE differentiation	4 to 1	2019-04-29 14:34:45	2019-04-29 18:21:40	3:46:55	335	334	1	0	Micropipet tip loading error
Round 1	5	1	RPE differentiation	1 to 4	2019-04-30 10:23:46	2019-04-30 14:00:16	3:36:30	335	335	0	0	-
Round 1	5	2	RPE differentiation	5 to 8	2019-04-30 14:22:26	2019-04-30 17:58:38	3:36:12	335	334	1	0	Micropipet tip loading error
Round 1	6	1	RPE differentiation	8 to 5	2019-05-01 10:20:57	2019-05-01 13:51:48	3:30:51	335	335	0	0	-
Round 1	6	2	RPE differentiation	4 to 1	2019-05-01 14:07:19	2019-05-01 17:44:17	3:36:58	335	335	0	0	-
Round 1	7	1	RPE differentiation	1 to 4	2019-05-02 11:49:40	2019-05-02 15:23:40	3:34:00	335	335	0	0	-
Round 1	7	2	RPE differentiation	5 to 8	2019-05-02 15:38:03	2019-05-02 19:46:03	4:08:00	335	334	1	0	Microscope error
Round 1	8	1	RPE differentiation	8 to 5	2019-05-03 11:10:58	2019-05-03 14:36:35	3:25:37	335	335	0	0	-
Round 1	8	2	RPE differentiation	4 to 1	2019-05-03 14:56:27	2019-05-03 18:24:53	3:28:26	335	335	0	0	-
Round 1	9	1	RPE differentiation	1 to 4	2019-05-04 12:27:22	2019-05-04 15:52:27	3:25:05	335	335	0	0	-
Round 1	9	2	RPE differentiation	5 to 8	2019-05-04 16:06:13	2019-05-04 19:26:36	3:20:23	335	334	1	0	Micropipet tip loading error
Round 1	10	1	RPE differentiation	8 to 5	2019-05-05 11:22:46	2019-05-05 14:39:21	3:16:35	335	335	0	0	-
Round 1	10	2	RPE differentiation	4 to 1	2019-05-05 14:53:39	2019-05-05 18:13:57	3:20:18	335	335	0	0	-
Round 1	11	1	RPE differentiation	1 to 4	2019-05-06 11:03:43	2019-05-06 14:18:02	3:14:19	335	335	0	0	-
Round 1	11	2	RPE differentiation	5 to 8	2019-05-06 14:34:48	2019-05-06 17:48:26	3:13:38	335	335	0	0	-
Round 1	12	1	RPE differentiation	8 to 5	2019-05-07 10:46:31	2019-05-07 13:54:26	3:07:55	335	335	0	0	-
Round 1	12	2	RPE differentiation	4 to 1	2019-05-07 14:16:57	2019-05-07 17:22:22	3:05:25	335	335	0	0	-
Round 1	13	1	RPE differentiation	1 to 4	2019-05-08 11:09:22	2019-05-08 14:10:08	3:00:46	335	335	0	0	-
Round 1	13	2	RPE differentiation	5 to 8	2019-05-08 14:23:51	2019-05-08 17:28:12	3:04:21	335	335	0	0	-
Round 1	14	1	RPE differentiation	8 to 5	2019-05-09 11:00:10	2019-05-09 13:58:53	2:58:43	335	335	0	0	-
Round 1	14	2	RPE differentiation	4 to 1	2019-05-09 14:12:53	2019-05-09 17:10:04	2:57:11	335	335	0	0	-
Round 1	15	1	RPE differentiation	1 to 4	2019-05-10 11:28:45	2019-05-10 14:23:09	2:54:24	335	335	0	0	-
Round 1	15	2	RPE differentiation	5 to 8	2019-05-10 14:40:10	2019-05-10 17:35:10	2:55:00	335	335	0	0	-
Round 1	16	1	RPE differentiation	8 to 5	2019-05-11 11:09:12	2019-05-11 14:02:03	2:52:51	335	335	0	0	-
Round 1	16	2	RPE differentiation	4 to 1	2019-05-11 14:14:49	2019-05-11 17:04:09	2:49:20	335	335	0	0	-
Round 1	17	1	RPE differentiation	1 to 4	2019-05-12 11:17:24	2019-05-12 14:00:06	2:42:42	335	335	0	0	-
Round 1	17	2	RPE differentiation	5 to 8	2019-05-12 14:14:23	2019-05-12 17:02:58	2:48:35	335	335	0	0	-
Round 1	18	1	RPE differentiation	8 to 5	2019-05-13 11:14:38	2019-05-13 13:54:07	2:39:29	335	335	0	0	-
Round 1	18	2	RPE differentiation	4 to 1	2019-05-13 14:08:24	2019-05-13 16:51:46	2:43:22	335	335	0	0	-
Round 1	19	1	RPE differentiation	1 to 4	2019-05-14 10:47:52	2019-05-14 13:28:10	2:40:18	335	335	0	0	-
Round 1	19	2	RPE differentiation	5 to 8	2019-05-14 13:39:32	2019-05-14 16:17:52	2:38:20	335	335	0	0	-
Round 1	20	1	RPE differentiation	8 to 5	2019-05-15 10:41:33	2019-05-15 12:49:04	2:07:31	77	76	1	0	Microscope error
Round 1	20	2	RPE differentiation	4 to 1	2019-05-15 12:52:38	2019-05-15 14:40:33	1:47:55	77	77	0	0	-
Round 1	21	1	RPE differentiation	1 to 4	2019-05-16 10:49:00	2019-05-16 12:37:02	1:48:02	77	77	0	0	-
Round 1	21	2	RPE differentiation	5 to 8	2019-05-16 12:39:44	2019-05-16 14:27:38	1:47:54	77	77	0	0	-
Round 1	22	1	RPE differentiation	8 to 5	2019-05-17 10:36:09	2019-05-17 12:24:33	1:48:24	77	77	0	0	-
Round 1	22	2	RPE differentiation	4 to 1	2019-05-17 12:32:36	2019-05-17 14:21:25	1:48:49	77	77	0	0	-
Round 1	23	1	RPE differentiation	1 to 4	2019-05-18 11:45:26	2019-05-18 13:33:01	1:47:35	77	77	0	0	-
Round 1	23	2	RPE differentiation	5 to 8	2019-05-18 13:57:57	2019-05-18 15:46:24	1:48:27	77	77	0	0	-
Round 1	24	1	RPE differentiation	8 to 5	2019-05-19 12:10:03	2019-05-19 13:57:52	1:47:49	77	77	0	0	-
Round 1	24	2	RPE differentiation	4 to 1	2019-05-19 14:09:03	2019-05-19 15:57:58	1:48:55	77	77	0	0	-
Round 1	25	1	RPE differentiation	1 to 4	2019-05-20 10:23:49	2019-05-20 13:22:28	2:58:39	77	73	1	3	HDD for microscope PC error
Round 1	25	2	RPE differentiation	5 to 8	2019-05-20 14:33:42	2019-05-20 16:06:50	1:33:08	77	76	1	0	HDD for microscope PC error
Round 1	26	1	RPE maintenance	8 to 5	2019-05-21 10:43:02	2019-05-21 12:30:52	1:47:50	77	77	0	0	-
Round 1	26	2	RPE maintenance	4 to 1	2019-05-21 12:35:08	2019-05-21 14:23:15	1:48:07	77	77	0	0	-
Round 1	28	1	RPE maintenance	1 to 4	2019-05-23 10:27:32	2019-05-23 12:15:19	1:47:47	77	77	0	0	-
Round 1	28	2	RPE maintenance	5 to 8	2019-05-23 12:20:06	2019-05-23 14:02:00	1:41:54	77	77	0	0	-
Round 1	30	1	RPE maintenance	8 to 5	2019-05-25 11:19:43	2019-05-25 13:07:38	1:47:55	77	77	0	0	-
Round 1	30	2	RPE maintenance	4 to 1	2019-05-25 13:20:54	2019-05-25 15:08:39	1:47:45	77	77	0	0	-
Round 1	32	1	RPE maintenance	1 to 4	2019-05-27 11:20:59	2019-05-27 13:08:24	1:47:25	77	77	0	0	-
Round 1	32	2	RPE maintenance	5 to 8	2019-05-27 13:11:12	2019-05-27 14:58:17	1:47:05	77	77	0	0	-
Round 2	-7	1	Seeding	4 to 1, 8 to 5	2019-07-05 12:13:58	2019-07-05 14:02:26	1:48:28	89	89	0	0	-
Round 2	-6	1	Preconditioning	1 to 4	2019-07-06 12:37:47	2019-07-06 15:29:57	2:52:10	193	193	0	0	-
Round 2	-6	2	Preconditioning	5 to 8	2019-07-06 15:42:20	2019-07-06 18:34:12	2:51:52	193	193	0	0	-
Round 2	-5	1	Preconditioning	8 to 5	2019-07-07 11:59:55	2019-07-07 14:52:32	2:52:37	193	193	0	0	-
Round 2	-5	2	Preconditioning	4 to 1	2019-07-07 15:06:29	2019-07-07 18:06:35	3:00:06	193	193	0	0	-
Round 2	-4	1	Preconditioning	1 to 4	2019-07-08 10:50:01	2019-07-08 14:02:48	3:12:47	193	193	0	0	-
Round 2	-4	2	Preconditioning	5 to 8	2019-07-08 14:16:30	2019-07-08 17:10:29	2:53:59	193	193	0	0	-
Round 2	-3	1	Preconditioning	8 to 5	2019-07-09 10:51:04	2019-07-09 13:47:44	2:56:40	193	193	0	0	-
Round 2	-3	2	Preconditioning	4 to 1	2019-07-09 14:01:09	2019-07-09 17:47:02	3:45:53	193	192	1	0	Microscope error
Round 2	-2	1	Preconditioning	1 to 4	2019-07-10 10:45:28	2019-07-10 14:22:52	3:37:24	193	192	1	0	Microscope error
Round 2	-2	2	Preconditioning	5 to 8	2019-07-10 14:35:27	2019-07-10 17:34:50	2:59:23	193	193	0	0	-
Round 2	-1	1	Preconditioning	8 to 5	2019-07-11 11:11:05	2019-07-11 14:05:03	2:53:58	193	193	0	0	-
Round 2	-1	2	Preconditioning	4 to 1	2019-07-11 14:19:25	2019-07-11 17:50:07	3:30:42	193	193	0	0	-
Round 2	0	1	Passage	1 to 4	2019-07-12 09:52:09	2019-07-12 15:32:04	5:39:55	151	151	0	0	-
Round 2	0	2	Passage	5 to 8	2019-07-12 16:21:53	2019-07-12 22:01:45	5:39:52	151	151	0	0	-
Round 2	1	1	RPE differentiation	1 to 4	2019-07-13 11:39:30	2019-07-13 15:34:40	3:55:10	335	335	0	0	-
Round 2	1	2	RPE differentiation	5 to 8	2019-07-13 15:51:55	2019-07-13 19:39:46	3:47:51	335	335	0	0	-
Round 2	2	1	RPE differentiation	8 to 5	2019-07-14 11:42:19	2019-07-14 15:29:58	3:47:39	335	335	0	0	-
Round 2	2	2	RPE differentiation	4 to 1	2019-07-14 15:46:01	2019-07-14 19:39:59	3:53:58	335	335	0	0	-
Round 2	3	1	RPE differentiation	1 to 4	2019-07-15 11:58:25	2019-07-15 15:48:11	3:49:46	335	335	0	0	-
Round 2	3	2	RPE differentiation	5 to 8	2019-07-15 16:23:15	2019-07-15 20:07:39	3:44:24	335	335	0	0	-
Round 2	4	1	RPE differentiation	8 to 5	2019-07-16 11:48:14	2019-07-16 15:25:54	3:37:40	335	335	0	0	-
Round 2	4	2	RPE differentiation	4 to 1	2019-07-16 15:44:54	2019-07-16 19:38:34	3:53:40	335	335	0	0	-
Round 2	5	1	RPE differentiation	1 to 4	2019-07-17 12:02:00	2019-07-17 15:41:33	3:39:33	335	335	0	0	-
Round 2	5	2	RPE differentiation	5 to 8	2019-07-17 15:59:59	2019-07-17 19:33:51	3:33:52	335	335	0	0	-
Round 2	6	1	RPE differentiation	8 to 5	2019-07-18 11:14:42	2019-07-18 14:42:16	3:27:34	335	335	0	0	-
Round 2	6	2	RPE differentiation	4 to 1	2019-07-18 15:11:44	2019-07-18 18:51:06	3:39:22	335	335	0	0	-
Round 2	7	1	RPE differentiation	1 to 4	2019-07-19 11:13:50	2019-07-19 14:56:27	3:42:37	335	335	0	0	-
Round 2	7	2	RPE differentiation	5 to 8	2019-07-19 15:16:34	2019-07-19 18:43:52	3:27:18	335	335	0	0	-
Round 2	8	1	RPE differentiation	8 to 5	2019-07-20 11:29:35	2019-07-20 14:57:45	3:28:10	335	335	0	0	-
Round 2	8	2	RPE differentiation	4 to 1	2019-07-20 15:50:29	2019-07-20 19:23:04	3:32:35	335	335	0	0	-
Round 2	9	1	RPE differentiation	1 to 4	2019-07-21 11:29:51	2019-07-21 14:59:10	3:29:19	335	335	0	0	-
Round 2	9	2	RPE differentiation	5 to 8	2019-07-21 15:20:13	2019-07-21 18:41:38	3:21:25	335	335	0	0	-
Round 2	10	1	RPE differentiation	8 to 5	2019-07-22 11:23:57	2019-07-22 14:42:57	3:19:00	335	335	0	0	-
Round 2	10	2	RPE differentiation	4 to 1	2019-07-22 14:57:36	2019-07-22 18:29:12	3:31:36	335	335	0	0	-
Round 2	11	1	RPE differentiation	1 to 4	2019-07-23 11:06:03	2019-07-23 14:40:34	3:34:31	335	334	1	0	Human error
Round 2	11	2	RPE differentiation	5 to 8	2019-07-23 15:02:19	2019-07-23 18:13:29	3:11:10	335	335	0	0	-
Round 2	12	1	RPE differentiation	8 to 5	2019-07-24 11:08:29	2019-07-24 14:21:30	3:13:01	335	335	0	0	-
Round 2	12	2	RPE differentiation	4 to 1	2019-07-24 14:38:04	2019-07-24 17:56:27	3:18:23	335	335	0	0	-
Round 2	13	1	RPE differentiation	1 to 4	2019-07-25 11:50:41	2019-07-25 15:07:52	3:17:11	335	335	0	0	-
Round 2	13	2	RPE differentiation	5 to 8	2019-07-25 15:32:25	2019-07-25 18:39:43	3:07:18	335	335	0	0	-
Round 2	14	1	RPE differentiation	8 to 5	2019-07-26 11:04:57	2019-07-26 14:11:04	3:06:07	335	335	0	0	-
Round 2	14	2	RPE differentiation	4 to 1	2019-07-26 14:26:17	2019-07-26 17:38:10	3:11:53	335	335	0	0	-
Round 2	15	1	RPE differentiation	1 to 4	2019-07-27 11:13:59	2019-07-27 14:24:03	3:10:04	335	335	0	0	-
Round 2	15	2	RPE differentiation	5 to 8	2019-07-27 14:44:33	2019-07-27 17:49:16	3:04:43	335	335	0	0	-
Round 2	16	1	RPE differentiation	8 to 5	2019-07-28 11:06:32	2019-07-28 14:19:05	3:12:33	335	334	1	0	Human error
Round 2	16	2	RPE differentiation	4 to 1	2019-07-28 14:33:43	2019-07-28 17:37:40	3:03:57	335	335	0	0	-
Round 2	17	1	RPE differentiation	1 to 4	2019-07-29 13:00:38	2019-07-29 16:02:53	3:02:15	335	335	0	0	-
Round 2	17	2	RPE differentiation	5 to 8	2019-07-29 16:17:44	2019-07-29 19:12:41	2:54:57	335	335	0	0	-
Round 2	18	1	RPE differentiation	8 to 5	2019-07-30 11:15:06	2019-07-30 14:00:02	2:44:56	335	335	0	0	-
Round 2	18	2	RPE differentiation	4 to 1	2019-07-30 14:14:24	2019-07-30 17:12:07	2:57:43	335	335	0	0	-
Round 2	19	1	RPE differentiation	1 to 4	2019-07-31 11:08:58	2019-07-31 13:51:09	2:42:11	335	335	0	0	-
Round 2	19	2	RPE differentiation	5 to 8	2019-07-31 14:03:03	2019-07-31 16:44:12	2:41:09	335	335	0	0	-
Round 2	20	1	RPE differentiation	8 to 5	2019-08-01 11:15:57	2019-08-01 13:03:06	1:47:09	77	77	0	0	-
Round 2	20	2	RPE differentiation	4 to 1	2019-08-01 13:06:24	2019-08-01 14:54:13	1:47:49	77	77	0	0	-
Round 2	21	1	RPE differentiation	1 to 4	2019-08-02 11:14:00	2019-08-02 13:02:07	1:48:07	77	77	0	0	-
Round 2	21	2	RPE differentiation	5 to 8	2019-08-02 13:04:57	2019-08-02 14:53:15	1:48:18	77	77	0	0	-
Round 2	22	1	RPE differentiation	8 to 5	2019-08-03 12:14:11	2019-08-03 14:02:17	1:48:06	77	77	0	0	-
Round 2	22	2	RPE differentiation	4 to 1	2019-08-03 14:27:08	2019-08-03 16:15:12	1:48:04	77	77	0	0	-
Round 2	23	1	RPE differentiation	1 to 4	2019-08-04 11:19:55	2019-08-04 13:08:08	1:48:13	77	77	0	0	-
Round 2	23	2	RPE differentiation	5 to 8	2019-08-04 13:11:15	2019-08-04 14:59:14	1:47:59	77	77	0	0	-
Round 2	24	1	RPE differentiation	8 to 5	2019-08-05 11:15:04	2019-08-05 13:03:23	1:48:19	77	77	0	0	-
Round 2	24	2	RPE differentiation	4 to 1	2019-08-05 13:07:05	2019-08-05 14:55:22	1:48:17	77	77	0	0	-
Round 2	25	1	RPE differentiation	1 to 4	2019-08-06 11:10:12	2019-08-06 12:58:22	1:48:10	77	77	0	0	-
Round 2	25	2	RPE differentiation	5 to 8	2019-08-06 13:02:11	2019-08-06 14:50:27	1:48:16	77	77	0	0	-
Round 2	26	1	RPE maintenance	8 to 5	2019-08-07 11:17:07	2019-08-07 13:05:18	1:48:11	77	77	0	0	-
Round 2	26	2	RPE maintenance	4 to 1	2019-08-07 13:08:59	2019-08-07 14:56:37	1:47:38	77	77	0	0	-
Round 2	28	1	RPE maintenance	1 to 4	2019-08-09 11:07:57	2019-08-09 12:56:19	1:48:22	77	77	0	0	-
Round 2	28	2	RPE maintenance	5 to 8	2019-08-09 13:00:08	2019-08-09 14:48:23	1:48:15	77	77	0	0	-
Round 2	30	1	RPE maintenance	8 to 5	2019-08-11 11:36:18	2019-08-11 13:24:17	1:47:59	77	77	0	0	-
Round 2	30	2	RPE maintenance	4 to 1	2019-08-11 13:28:48	2019-08-11 15:16:20	1:47:32	77	77	0	0	-
Round 2	32	1	RPE maintenance	1 to 4	2019-08-13 11:01:08	2019-08-13 12:48:29	1:47:21	77	77	0	0	-
Round 2	32	2	RPE maintenance	5 to 8	2019-08-13 12:51:17	2019-08-13 14:39:31	1:48:14	77	77	0	0	-
Round 3	-7	1	Seeding	4 to 1, 8 to 5	2020-01-23 12:14:11	2020-01-23 14:02:42	1:48:31	89	89	0	0	-
Round 3	-6	1	Preconditioning	1 to 4	2020-01-24 12:17:19	2020-01-24 14:35:29	2:18:10	193	193	0	0	-
Round 3	-6	2	Preconditioning	5 to 8	2020-01-24 14:51:09	2020-01-24 17:11:29	2:20:20	193	193	0	0	-
Round 3	-5	1	Preconditioning	8 to 5	2020-01-25 10:30:07	2020-01-25 13:17:00	2:46:53	193	193	0	0	-
Round 3	-5	2	Preconditioning	4 to 1	2020-01-25 13:30:34	2020-01-25 16:19:06	2:48:32	193	193	0	0	-
Round 3	-4	1	Preconditioning	1 to 4	2020-01-26 12:26:20	2020-01-26 15:15:04	2:48:44	193	193	0	0	-
Round 3	-4	2	Preconditioning	5 to 8	2020-01-26 15:42:40	2020-01-26 18:29:27	2:46:47	193	193	0	0	-
Round 3	-3	1	Preconditioning	8 to 5	2020-01-27 11:20:00	2020-01-27 14:06:37	2:46:37	193	193	0	0	-
Round 3	-3	2	Preconditioning	4 to 1	2020-01-27 14:36:26	2020-01-27 17:24:48	2:48:22	193	193	0	0	-
Round 3	-2	1	Preconditioning	1 to 4	2020-01-28 10:47:01	2020-01-28 13:35:08	2:48:07	193	193	0	0	-
Round 3	-2	2	Preconditioning	5 to 8	2020-01-28 13:52:28	2020-01-28 16:39:04	2:46:36	193	193	0	0	-
Round 3	-1	1	Preconditioning	8 to 5	2020-01-29 10:34:00	2020-01-29 13:20:50	2:46:50	193	193	0	0	-
Round 3	-1	2	Preconditioning	4 to 1	2020-01-29 13:38:20	2020-01-29 16:26:34	2:48:14	193	193	0	0	-
Round 3	0	1	Passage	1 to 4	2020-01-30 10:12:02	2020-01-30 15:03:27	4:51:25	151	151	0	0	-
Round 3	0	2	Passage	5 to 8	2020-01-30 16:08:40	2020-01-30 20:59:38	4:50:58	151	151	0	0	-
Round 3	1	1	RPE differentiation	1 to 4	2020-01-31 11:30:25	2020-01-31 15:16:44	3:46:19	335	335	0	0	-
Round 3	1	2	RPE differentiation	5 to 8	2020-01-31 15:45:29	2020-01-31 19:30:05	3:44:36	335	335	0	0	-
Round 3	2	1	RPE differentiation	8 to 5	2020-02-01 10:09:19	2020-02-01 13:52:04	3:42:45	335	335	0	0	-
Round 3	2	2	RPE differentiation	4 to 1	2020-02-01 14:11:49	2020-02-01 17:55:03	3:43:14	335	335	0	0	-
Round 3	3	1	RPE differentiation	1 to 4	2020-02-02 11:38:24	2020-02-02 15:20:01	3:41:37	335	335	0	0	-
Round 3	3	2	RPE differentiation	5 to 8	2020-02-02 16:01:22	2020-02-02 19:46:28	3:45:06	335	335	0	0	-
Round 3	4	1	RPE differentiation	8 to 5	2020-02-03 12:10:35	2020-02-03 15:53:17	3:42:42	335	335	0	0	-
Round 3	4	2	RPE differentiation	4 to 1	2020-02-03 16:12:03	2020-02-03 20:01:30	3:49:27	335	335	0	0	-
Round 3	5	1	RPE differentiation	1 to 4	2020-02-04 10:48:49	2020-02-04 14:32:21	3:43:32	335	335	0	0	-
Round 3	5	2	RPE differentiation	5 to 8	2020-02-04 14:51:07	2020-02-04 18:26:28	3:35:21	335	335	0	0	-
Round 3	6	1	RPE differentiation	8 to 5	2020-02-05 10:47:33	2020-02-05 14:15:17	3:27:44	335	335	0	0	-
Round 3	6	2	RPE differentiation	4 to 1	2020-02-05 15:02:00	2020-02-05 18:34:28	3:32:28	335	335	0	0	-
Round 3	7	1	RPE differentiation	1 to 4	2020-02-06 10:57:14	2020-02-06 14:34:23	3:37:09	335	335	0	0	-
Round 3	7	2	RPE differentiation	5 to 8	2020-02-06 14:50:40	2020-02-06 18:19:29	3:28:49	335	335	0	0	-
Round 3	8	1	RPE differentiation	8 to 5	2020-02-07 10:49:46	2020-02-07 14:21:17	3:31:31	335	335	0	0	-
Round 3	8	2	RPE differentiation	4 to 1	2020-02-07 14:41:38	2020-02-07 18:19:31	3:37:53	335	335	0	0	-
Round 3	9	1	RPE differentiation	1 to 4	2020-02-08 12:17:03	2020-02-08 15:47:23	3:30:20	335	335	0	0	-
Round 3	9	2	RPE differentiation	5 to 8	2020-02-08 16:07:54	2020-02-08 19:39:30	3:31:36	335	335	0	0	-
Round 3	10	1	RPE differentiation	8 to 5	2020-02-09 12:12:10	2020-02-09 15:42:21	3:30:11	335	335	0	0	-
Round 3	10	2	RPE differentiation	4 to 1	2020-02-09 16:19:02	2020-02-09 19:44:19	3:25:17	335	335	0	0	-
Round 3	11	1	RPE differentiation	1 to 4	2020-02-10 11:04:03	2020-02-10 14:20:52	3:16:49	335	335	0	0	-
Round 3	11	2	RPE differentiation	5 to 8	2020-02-10 14:38:01	2020-02-10 17:59:34	3:21:33	335	335	0	0	-
Round 3	12	1	RPE differentiation	8 to 5	2020-02-11 10:29:51	2020-02-11 13:49:54	3:20:03	335	335	0	0	-
Round 3	12	2	RPE differentiation	4 to 1	2020-02-11 14:06:17	2020-02-11 17:26:52	3:20:35	335	335	0	0	-
Round 3	13	1	RPE differentiation	1 to 4	2020-02-12 11:13:48	2020-02-12 14:30:45	3:16:57	335	335	0	0	-
Round 3	13	2	RPE differentiation	5 to 8	2020-02-12 14:56:06	2020-02-12 18:14:33	3:18:27	335	335	0	0	-
Round 3	14	1	RPE differentiation	8 to 5	2020-02-13 10:48:58	2020-02-13 14:01:34	3:12:36	335	335	0	0	-
Round 3	14	2	RPE differentiation	4 to 1	2020-02-13 14:19:19	2020-02-13 17:31:45	3:12:26	335	335	0	0	-
Round 3	15	1	RPE differentiation	1 to 4	2020-02-14 10:56:44	2020-02-14 14:10:38	3:13:54	335	335	0	0	-
Round 3	15	2	RPE differentiation	5 to 8	2020-02-14 14:38:41	2020-02-14 17:50:15	3:11:34	335	335	0	0	-
Round 3	16	1	RPE differentiation	8 to 5	2020-02-15 12:00:36	2020-02-15 15:06:18	3:05:42	335	335	0	0	-
Round 3	16	2	RPE differentiation	4 to 1	2020-02-15 15:27:23	2020-02-15 18:31:39	3:04:16	335	335	0	0	-
Round 3	17	1	RPE differentiation	1 to 4	2020-02-16 11:21:51	2020-02-16 14:20:40	2:58:49	335	335	0	0	-
Round 3	17	2	RPE differentiation	5 to 8	2020-02-16 15:26:58	2020-02-16 18:21:43	2:54:45	335	335	0	0	-
Round 3	18	1	RPE differentiation	8 to 5	2020-02-17 10:36:42	2020-02-17 13:09:04	2:32:22	335	335	0	0	-
Round 3	18	2	RPE differentiation	4 to 1	2020-02-17 13:22:34	2020-02-17 15:57:49	2:35:15	335	335	0	0	-
Round 3	19	1	RPE differentiation	1 to 4	2020-02-18 11:04:49	2020-02-18 13:36:47	2:31:58	335	335	0	0	-
Round 3	19	2	RPE differentiation	5 to 8	2020-02-18 14:01:25	2020-02-18 16:31:50	2:30:25	335	335	0	0	-
Round 3	20	1	RPE differentiation	8 to 5	2020-02-19 10:48:18	2020-02-19 12:25:46	1:37:28	77	77	0	0	-
Round 3	20	2	RPE differentiation	4 to 1	2020-02-19 12:32:42	2020-02-19 14:12:55	1:40:13	77	77	0	0	-
Round 3	21	1	RPE differentiation	1 to 4	2020-02-20 11:00:04	2020-02-20 12:39:46	1:39:42	77	77	0	0	-
Round 3	21	2	RPE differentiation	5 to 8	2020-02-20 12:57:08	2020-02-20 14:35:49	1:38:41	77	77	0	0	-
Round 3	22	1	RPE differentiation	8 to 5	2020-02-21 11:15:01	2020-02-21 12:53:42	1:38:41	77	77	0	0	-
Round 3	22	2	RPE differentiation	4 to 1	2020-02-21 13:19:54	2020-02-21 14:58:56	1:39:02	77	77	0	0	-
Round 3	23	1	RPE differentiation	1 to 4	2020-02-22 11:14:10	2020-02-22 12:53:50	1:39:40	77	77	0	0	-
Round 3	23	2	RPE differentiation	5 to 8	2020-02-22 13:02:20	2020-02-22 14:39:52	1:37:32	77	77	0	0	-
Round 3	24	1	RPE differentiation	8 to 5	2020-02-23 11:54:56	2020-02-23 13:32:46	1:37:50	77	77	0	0	-
Round 3	24	2	RPE differentiation	4 to 1	2020-02-23 13:56:51	2020-02-23 15:36:55	1:40:04	77	77	0	0	-
Round 3	25	1	RPE differentiation	1 to 4	2020-02-24 11:47:49	2020-02-24 13:28:01	1:40:12	77	77	0	0	-
Round 3	25	2	RPE differentiation	5 to 8	2020-02-24 13:48:53	2020-02-24 15:22:06	1:33:13	77	77	0	0	-
Round 3	26	1	RPE maintenance	8 to 5	2020-02-25 10:51:04	2020-02-25 12:28:52	1:37:48	77	77	0	0	-
Round 3	26	2	RPE maintenance	4 to 1	2020-02-25 12:50:19	2020-02-25 14:29:00	1:38:41	77	77	0	0	-
Round 3	28	1	RPE maintenance	1 to 4	2020-02-27 10:47:29	2020-02-27 12:27:10	1:39:41	77	77	0	0	-
Round 3	28	2	RPE maintenance	5 to 8	2020-02-27 13:20:27	2020-02-27 14:58:11	1:37:44	77	77	0	0	-
Round 3	30	1	RPE maintenance	8 to 5	2020-02-29 11:09:03	2020-02-29 12:47:54	1:38:51	77	77	0	0	-
Round 3	30	2	RPE maintenance	4 to 1	2020-02-29 12:52:16	2020-02-29 14:31:08	1:38:52	77	77	0	0	-
Round 3	32	1	RPE maintenance	1 to 4	2020-03-02 10:55:35	2020-03-02 12:35:13	1:39:38	77	77	0	0	-
Round 3	32	2	RPE maintenance	5 to 8	2020-03-02 12:40:00	2020-03-02 14:18:08	1:38:08	77	77	0	0	-
Validation	-7	1	Seeding	4 to 1, 8 to 5	2020-03-19 12:08:21	2020-03-19 13:56:49	1:48:28	89	89	0	0	-
Validation	-6	1	Preconditioning	1 to 4	2020-03-20 12:21:02	2020-03-20 14:40:31	2:19:29	193	193	0	0	-
Validation	-6	2	Preconditioning	5 to 8	2020-03-20 14:52:24	2020-03-20 17:11:03	2:18:39	193	193	0	0	-
Validation	-5	1	Preconditioning	8 to 5	2020-03-21 11:21:43	2020-03-21 13:49:58	2:28:15	193	193	0	0	-
Validation	-5	2	Preconditioning	4 to 1	2020-03-21 14:39:40	2020-03-21 17:08:07	2:28:27	193	193	0	0	-
Validation	-4	1	Preconditioning	1 to 4	2020-03-22 11:41:00	2020-03-22 14:09:42	2:28:42	193	193	0	0	-
Validation	-4	2	Preconditioning	5 to 8	2020-03-22 14:24:09	2020-03-22 16:52:43	2:28:34	193	193	0	0	-
Validation	-3	1	Preconditioning	8 to 5	2020-03-23 11:02:28	2020-03-23 13:30:41	2:28:13	193	193	0	0	-
Validation	-3	2	Preconditioning	4 to 1	2020-03-23 13:45:00	2020-03-23 16:13:54	2:28:54	193	193	0	0	-
Validation	-2	1	Preconditioning	1 to 4	2020-03-24 10:54:41	2020-03-24 13:22:54	2:28:13	193	193	0	0	-
Validation	-2	2	Preconditioning	5 to 8	2020-03-24 13:35:32	2020-03-24 16:03:37	2:28:05	193	193	0	0	-
Validation	-1	1	Preconditioning	8 to 5	2020-03-25 10:51:01	2020-03-25 13:19:33	2:28:32	193	193	0	0	-
Validation	-1	2	Preconditioning	4 to 1	2020-03-25 13:32:00	2020-03-25 16:01:31	2:29:31	193	193	0	0	-
Validation	0	1	Passage	1 to 4	2020-03-26 09:50:33	2020-03-26 14:54:29	5:03:56	151	151	0	0	-
Validation	0	2	Passage	5 to 8	2020-03-26 15:58:43	2020-03-26 21:02:35	5:03:52	151	151	0	0	-
Validation	1	1	RPE differentiation	1 to 4	2020-03-27 11:03:34	2020-03-27 14:32:45	3:29:11	335	335	0	0	-
Validation	1	2	RPE differentiation	5 to 8	2020-03-27 14:45:31	2020-03-27 18:13:14	3:27:43	335	335	0	0	-
Validation	2	1	RPE differentiation	8 to 5	2020-03-28 11:09:54	2020-03-28 14:36:49	3:26:55	335	335	0	0	-
Validation	2	2	RPE differentiation	4 to 1	2020-03-28 15:09:07	2020-03-28 18:36:40	3:27:33	335	335	0	0	-
Validation	3	1	RPE differentiation	1 to 4	2020-03-29 11:18:54	2020-03-29 14:44:47	3:25:53	335	335	0	0	-
Validation	3	2	RPE differentiation	5 to 8	2020-03-29 15:10:41	2020-03-29 18:36:30	3:25:49	335	335	0	0	-
Validation	4	1	RPE differentiation	8 to 5	2020-03-30 10:58:35	2020-03-30 14:16:32	3:17:57	335	335	0	0	-
Validation	4	2	RPE differentiation	4 to 1	2020-03-30 14:30:35	2020-03-30 17:49:07	3:18:32	335	335	0	0	-
Validation	5	1	RPE differentiation	1 to 4	2020-03-31 10:42:54	2020-03-31 13:54:05	3:11:11	335	335	0	0	-
Validation	5	2	RPE differentiation	5 to 8	2020-03-31 14:09:58	2020-03-31 17:20:02	3:10:04	335	335	0	0	-
Validation	6	1	RPE differentiation	8 to 5	2020-04-01 10:42:30	2020-04-01 13:51:42	3:09:12	335	335	0	0	-
Validation	6	2	RPE differentiation	4 to 1	2020-04-01 14:03:21	2020-04-01 17:13:11	3:09:50	335	335	0	0	-
Validation	7	1	RPE differentiation	1 to 4	2020-04-02 10:45:16	2020-04-02 13:58:42	3:13:26	335	335	0	0	-
Validation	7	2	RPE differentiation	5 to 8	2020-04-02 14:13:40	2020-04-02 17:26:39	3:12:59	335	335	0	0	-
Validation	8	1	RPE differentiation	8 to 5	2020-04-03 10:57:42	2020-04-03 14:07:54	3:10:12	335	335	0	0	-
Validation	8	2	RPE differentiation	4 to 1	2020-04-03 14:22:42	2020-04-03 17:32:11	3:09:29	335	335	0	0	-
Validation	9	1	RPE differentiation	1 to 4	2020-04-04 11:39:21	2020-04-04 14:50:54	3:11:33	335	335	0	0	-
Validation	9	2	RPE differentiation	5 to 8	2020-04-04 15:11:22	2020-04-04 18:22:00	3:10:38	335	335	0	0	-
Validation	10	1	RPE differentiation	8 to 5	2020-04-05 10:53:44	2020-04-05 14:01:48	3:08:04	335	335	0	0	-
Validation	10	2	RPE differentiation	4 to 1	2020-04-05 14:19:51	2020-04-05 17:27:56	3:08:05	335	335	0	0	-
Validation	11	1	RPE differentiation	1 to 4	2020-04-06 10:44:01	2020-04-06 13:50:03	3:06:02	335	335	0	0	-
Validation	11	2	RPE differentiation	5 to 8	2020-04-06 14:03:00	2020-04-06 17:08:10	3:05:10	335	335	0	0	-
Validation	12	1	RPE differentiation	8 to 5	2020-04-07 10:35:01	2020-04-07 13:32:56	2:57:55	335	335	0	0	-
Validation	12	2	RPE differentiation	4 to 1	2020-04-07 14:04:51	2020-04-07 17:01:06	2:56:15	335	335	0	0	-
Validation	13	1	RPE differentiation	1 to 4	2020-04-08 11:27:10	2020-04-08 14:21:01	2:53:51	335	335	0	0	-
Validation	13	2	RPE differentiation	5 to 8	2020-04-08 15:04:27	2020-04-08 17:58:07	2:53:40	335	335	0	0	-
Validation	14	1	RPE differentiation	8 to 5	2020-04-09 10:48:02	2020-04-09 13:37:57	2:49:55	335	335	0	0	-
Validation	14	2	RPE differentiation	4 to 1	2020-04-09 13:49:26	2020-04-09 16:40:07	2:50:41	335	335	0	0	-
Validation	15	1	RPE differentiation	1 to 4	2020-04-10 10:39:41	2020-04-10 13:35:35	2:55:54	335	334	1	0	Defective labware error
Validation	15	2	RPE differentiation	5 to 8	2020-04-10 13:47:27	2020-04-10 16:37:57	2:50:30	335	335	0	0	-
Validation	16	1	RPE differentiation	8 to 5	2020-04-11 11:07:36	2020-04-11 13:55:56	2:48:20	335	335	0	0	-
Validation	16	2	RPE differentiation	4 to 1	2020-04-11 14:24:46	2020-04-11 17:13:04	2:48:18	335	335	0	0	-
Validation	17	1	RPE differentiation	1 to 4	2020-04-12 10:59:29	2020-04-12 13:44:04	2:44:35	335	335	0	0	-
Validation	17	2	RPE differentiation	5 to 8	2020-04-12 14:00:25	2020-04-12 16:45:06	2:44:41	335	335	0	0	-
Validation	18	1	RPE differentiation	8 to 5	2020-04-13 11:17:36	2020-04-13 13:55:07	2:37:31	335	335	0	0	-
Validation	18	2	RPE differentiation	4 to 1	2020-04-13 14:17:37	2020-04-13 16:54:16	2:36:39	335	335	0	0	-
Validation	19	1	RPE differentiation	1 to 4	2020-04-14 09:59:29	2020-04-14 12:27:42	2:28:13	335	335	0	0	-
Validation	19	2	RPE differentiation	5 to 8	2020-04-14 12:40:42	2020-04-14 15:09:17	2:28:35	335	335	0	0	-
Validation	20	1	RPE differentiation	8 to 5	2020-04-15 12:34:37	2020-04-15 14:13:10	1:38:33	77	77	0	0	-
Validation	20	2	RPE differentiation	4 to 1	2020-04-15 14:48:03	2020-04-15 16:24:19	1:36:16	77	77	0	0	-
Validation	21	1	RPE differentiation	1 to 4	2020-04-16 11:04:38	2020-04-16 12:41:13	1:36:35	77	77	0	0	-
Validation	21	2	RPE differentiation	5 to 8	2020-04-16 13:16:09	2020-04-16 14:52:17	1:36:08	77	77	0	0	-
Validation	22	1	RPE differentiation	8 to 5	2020-04-17 10:50:08	2020-04-17 12:27:07	1:36:59	77	77	0	0	-
Validation	22	2	RPE differentiation	4 to 1	2020-04-17 12:45:59	2020-04-17 14:22:17	1:36:18	77	77	0	0	-
Validation	23	1	RPE differentiation	1 to 4	2020-04-18 11:04:36	2020-04-18 12:41:11	1:36:35	77	77	0	0	-
Validation	23	2	RPE differentiation	5 to 8	2020-04-18 13:16:05	2020-04-18 14:52:21	1:36:16	77	77	0	0	-
Validation	24	1	RPE differentiation	8 to 5	2020-04-19 10:58:06	2020-04-19 12:36:06	1:38:00	77	77	0	0	-
Validation	24	2	RPE differentiation	4 to 1	2020-04-19 12:41:16	2020-04-19 14:19:30	1:38:14	77	77	0	0	-
Validation	25	1	RPE differentiation	1 to 4	2020-04-20 11:04:36	2020-04-20 14:01:25	2:56:49	77	76	1	0	Microscope error
Validation	25	2	RPE differentiation	5 to 8	2020-04-20 14:36:20	2020-04-20 16:13:27	1:37:07	77	77	0	0	-
Validation	26	1	RPE maintenance	8 to 5	2020-04-21 11:06:08	2020-04-21 12:39:17	1:33:09	77	77	0	0	-
Validation	26	2	RPE maintenance	4 to 1	2020-04-21 12:42:56	2020-04-21 14:19:57	1:37:01	77	77	0	0	-
Validation	28	1	RPE maintenance	1 to 4	2020-04-23 11:12:10	2020-04-23 12:51:25	1:39:15	77	77	0	0	-
Validation	28	2	RPE maintenance	5 to 8	2020-04-23 12:54:42	2020-04-23 14:31:29	1:36:47	77	77	0	0	-
Validation	30	1	RPE maintenance	8 to 5	2020-04-25 11:45:49	2020-04-25 13:23:25	1:37:36	77	77	0	0	-
Validation	30	2	RPE maintenance	4 to 1	2020-04-25 13:28:38	2020-04-25 15:06:25	1:37:47	77	77	0	0	-
Validation	32	1	RPE maintenance	1 to 4	2020-04-27 10:43:29	2020-04-27 12:22:34	1:39:05	77	77	0	0	-
Validation	32	2	RPE maintenance	5 to 8	2020-04-27 12:25:00	2020-04-27 14:01:32	1:36:32	77	77	0	0	-

## Sheet: jobs
Supplementary Table 6
Experiment	DDay	Category	Plate	Start	End	Duration	Error
Baseline	-7	Seeding	4 to 1, 8 to 5	2019-02-07 12:22:29	2019-02-07 14:10:28	1:47:59	-
Baseline	-6	Preconditioning	1 to 4	2019-02-08 15:17:04	2019-02-08 17:48:33	2:31:29	-
Baseline	-6	Preconditioning	5 to 8	2019-02-08 18:02:44	2019-02-08 20:33:09	2:30:25	-
Baseline	-5	Preconditioning	8 to 5	2019-02-09 09:00:28	2019-02-09 11:30:37	2:30:09	-
Baseline	-5	Preconditioning	4 to 1	2019-02-09 11:40:26	2019-02-09 14:10:44	2:30:18	-
Baseline	-4	Preconditioning	1 to 4	2019-02-10 10:42:05	2019-02-10 13:35:55	2:53:50	Microscope error
Baseline	-4	Preconditioning	5 to 8	2019-02-10 13:48:43	2019-02-10 16:19:28	2:30:45	-
Baseline	-3	Preconditioning	8 to 5	2019-02-11 11:33:11	2019-02-11 14:04:12	2:31:01	-
Baseline	-3	Preconditioning	4 to 1	2019-02-11 15:50:22	2019-02-11 18:21:34	2:31:12	-
Baseline	-2	Preconditioning	1 to 4	2019-02-12 10:40:20	2019-02-12 13:10:57	2:30:37	-
Baseline	-2	Preconditioning	5 to 8	2019-02-12 13:23:49	2019-02-12 15:54:23	2:30:34	-
Baseline	-1	Preconditioning	8 to 5	2019-02-13 11:06:08	2019-02-13 13:36:06	2:29:58	-
Baseline	-1	Preconditioning	4 to 1	2019-02-13 13:50:46	2019-02-13 16:20:19	2:29:33	-
Baseline	0	Passage	1 to 4	2019-02-14 10:15:55	2019-02-14 15:58:04	5:42:09	-
Baseline	0	Passage	5 to 8	2019-02-14 16:44:16	2019-02-14 22:27:46	5:43:30	-
Baseline	1	RPE differentiation	1 to 4	2019-02-15 12:29:03	2019-02-15 14:59:32	2:30:29	-
Baseline	1	RPE differentiation	5 to 8	2019-02-15 15:16:55	2019-02-15 17:47:38	2:30:43	-
Baseline	2	RPE differentiation	8 to 5	2019-02-16 10:57:01	2019-02-16 13:30:10	2:33:09	-
Baseline	2	RPE differentiation	4 to 1	2019-02-16 13:42:48	2019-02-16 16:12:18	2:29:30	-
Baseline	3	RPE differentiation	1 to 4	2019-02-17 10:43:56	2019-02-17 13:13:53	2:29:57	-
Baseline	3	RPE differentiation	5 to 8	2019-02-17 13:25:31	2019-02-17 15:58:21	2:32:50	-
Baseline	4	RPE differentiation	8 to 5	2019-02-18 10:23:48	2019-02-18 12:56:37	2:32:49	-
Baseline	4	RPE differentiation	4 to 1	2019-02-18 13:19:30	2019-02-18 15:49:05	2:29:35	-
Baseline	5	RPE differentiation	1 to 4	2019-02-19 10:52:50	2019-02-19 13:23:47	2:30:57	-
Baseline	5	RPE differentiation	5 to 8	2019-02-19 13:39:38	2019-02-19 16:11:43	2:32:05	-
Baseline	6	RPE differentiation	8 to 5	2019-02-20 10:47:01	2019-02-20 13:19:42	2:32:41	-
Baseline	6	RPE differentiation	4 to 1	2019-02-20 13:30:50	2019-02-20 16:00:53	2:30:03	-
Baseline	7	RPE differentiation	1 to 4	2019-02-21 11:51:43	2019-02-21 14:22:25	2:30:42	-
Baseline	7	RPE differentiation	5 to 8	2019-02-21 14:38:16	2019-02-21 17:18:05	2:39:49	-
Baseline	8	RPE differentiation	8 to 5	2019-02-22 10:51:39	2019-02-22 13:22:00	2:30:21	-
Baseline	8	RPE differentiation	4 to 1	2019-02-22 13:32:56	2019-02-22 16:02:55	2:29:59	-
Baseline	9	RPE differentiation	1 to 4	2019-02-23 11:51:10	2019-02-23 14:21:48	2:30:38	-
Baseline	9	RPE differentiation	5 to 8	2019-02-23 14:32:11	2019-02-23 17:05:01	2:32:50	-
Baseline	10	RPE differentiation	8 to 5	2019-02-24 11:14:25	2019-02-24 13:47:13	2:32:48	-
Baseline	10	RPE differentiation	4 to 1	2019-02-24 13:58:19	2019-02-24 16:28:38	2:30:19	-
Baseline	11	RPE differentiation	1 to 4	2019-02-25 10:25:02	2019-02-25 12:55:03	2:30:01	-
Baseline	11	RPE differentiation	5 to 8	2019-02-25 13:06:49	2019-02-25 15:38:24	2:31:35	-
Baseline	12	RPE differentiation	8 to 5	2019-02-26 10:27:07	2019-02-26 12:59:19	2:32:12	-
Baseline	12	RPE differentiation	4 to 1	2019-02-26 13:11:17	2019-02-26 15:42:55	2:31:38	-
Baseline	13	RPE differentiation	1 to 4	2019-02-27 10:38:13	2019-02-27 13:32:25	2:54:12	Microscope error
Baseline	13	RPE differentiation	5 to 8	2019-02-27 13:46:37	2019-02-27 16:23:20	2:36:43	Micropipet tip ejection error
Baseline	14	RPE differentiation	8 to 5	2019-02-28 10:33:47	2019-02-28 13:07:34	2:33:47	Micropipet tip ejection error (x2)
Baseline	14	RPE differentiation	4 to 1	2019-02-28 13:21:42	2019-02-28 15:57:03	2:35:21	Micropipet tip ejection error (x3)
Baseline	15	RPE differentiation	1 to 4	2019-03-01 11:11:44	2019-03-01 13:42:16	2:30:32	-
Baseline	15	RPE differentiation	5 to 8	2019-03-01 13:53:04	2019-03-01 16:25:28	2:32:24	-
Baseline	16	RPE differentiation	8 to 5	2019-03-02 11:57:01	2019-03-02 14:27:19	2:30:18	-
Baseline	16	RPE differentiation	4 to 1	2019-03-02 14:38:14	2019-03-02 17:07:53	2:29:39	-
Baseline	17	RPE differentiation	1 to 4	2019-03-03 10:37:33	2019-03-03 13:26:30	2:48:57	Human error
Baseline	17	RPE differentiation	5 to 8	2019-03-03 13:49:29	2019-03-03 16:22:08	2:32:39	-
Baseline	18	RPE differentiation	8 to 5	2019-03-04 09:00:02	2019-03-04 11:31:58	2:31:56	-
Baseline	18	RPE differentiation	4 to 1	2019-03-04 12:12:20	2019-03-04 14:45:17	2:32:57	-
Baseline	19	RPE differentiation	1 to 4	2019-03-05 10:40:30	2019-03-05 13:10:05	2:29:35	-
Baseline	19	RPE differentiation	5 to 8	2019-03-05 13:23:54	2019-03-05 15:55:27	2:31:33	-
Baseline	20	RPE differentiation	8 to 5	2019-03-06 10:25:10	2019-03-06 12:13:36	1:48:26	-
Baseline	20	RPE differentiation	4 to 1	2019-03-06 12:20:49	2019-03-06 15:16:26	2:55:37	HDD for microscope PC error
Baseline	21	RPE differentiation	1 to 4	2019-03-07 11:17:57	2019-03-07 13:04:43	1:46:46	-
Baseline	21	RPE differentiation	5 to 8	2019-03-07 13:07:17	2019-03-07 14:55:11	1:47:54	-
Baseline	22	RPE differentiation	8 to 5	2019-03-08 10:22:27	2019-03-08 12:10:50	1:48:23	-
Baseline	22	RPE differentiation	4 to 1	2019-03-08 12:15:10	2019-03-08 14:02:38	1:47:28	-
Baseline	23	RPE differentiation	1 to 4	2019-03-09 10:25:05	2019-03-09 12:12:25	1:47:20	-
Baseline	23	RPE differentiation	5 to 8	2019-03-09 12:15:54	2019-03-09 14:04:59	1:49:05	-
Baseline	24	RPE differentiation	8 to 5	2019-03-10 10:38:53	2019-03-10 12:27:04	1:48:11	-
Baseline	24	RPE differentiation	4 to 1	2019-03-10 12:32:18	2019-03-10 14:19:17	1:46:59	-
Baseline	25	RPE differentiation	1 to 4	2019-03-11 10:16:04	2019-03-11 12:04:50	1:48:46	-
Baseline	25	RPE differentiation	5 to 8	2019-03-11 12:07:34	2019-03-11 13:55:20	1:47:46	-
Baseline	26	RPE maintenance	8 to 5	2019-03-12 10:52:50	2019-03-12 12:40:53	1:48:03	-
Baseline	26	RPE maintenance	4 to 1	2019-03-12 12:43:34	2019-03-12 14:32:14	1:48:40	-
Baseline	28	RPE maintenance	1 to 4	2019-03-14 10:28:18	2019-03-14 12:17:38	1:49:20	-
Baseline	28	RPE maintenance	5 to 8	2019-03-14 12:20:12	2019-03-14 14:11:09	1:50:57	-
Baseline	30	RPE maintenance	8 to 5	2019-03-16 10:23:16	2019-03-16 12:12:15	1:48:59	-
Baseline	30	RPE maintenance	4 to 1	2019-03-16 12:14:59	2019-03-16 14:06:20	1:51:21	Micropipet tip ejection error
Baseline	32	RPE maintenance	1 to 4	2019-03-18 11:30:01	2019-03-18 13:16:22	1:46:21	-
Baseline	32	RPE maintenance	5 to 8	2019-03-18 13:18:52	2019-03-18 15:06:29	1:47:37	-
Round 1	-7	Seeding	4 to 1, 8 to 5	2019-04-18 12:39:42	2019-04-18 14:27:46	1:48:04	-
Round 1	-6	Preconditioning	1 to 4	2019-04-19 13:05:56	2019-04-19 15:36:58	2:31:02	-
Round 1	-6	Preconditioning	5 to 8	2019-04-19 15:47:38	2019-04-19 18:06:44	2:19:06	-
Round 1	-5	Preconditioning	8 to 5	2019-04-20 11:18:42	2019-04-20 13:48:48	2:30:06	-
Round 1	-5	Preconditioning	4 to 1	2019-04-20 14:16:38	2019-04-20 16:59:46	2:43:08	Micropipet tip loading error
Round 1	-4	Preconditioning	1 to 4	2019-04-21 10:43:17	2019-04-21 13:23:02	2:39:45	-
Round 1	-4	Preconditioning	5 to 8	2019-04-21 13:35:04	2019-04-21 16:09:11	2:34:07	-
Round 1	-3	Preconditioning	8 to 5	2019-04-22 10:40:37	2019-04-22 13:19:21	2:38:44	-
Round 1	-3	Preconditioning	4 to 1	2019-04-22 13:32:35	2019-04-22 16:18:44	2:46:09	-
Round 1	-2	Preconditioning	1 to 4	2019-04-23 10:53:46	2019-04-23 13:43:26	2:49:40	-
Round 1	-2	Preconditioning	5 to 8	2019-04-23 13:56:40	2019-04-23 16:42:29	2:45:49	-
Round 1	-1	Preconditioning	8 to 5	2019-04-24 10:55:04	2019-04-24 13:46:14	2:51:10	-
Round 1	-1	Preconditioning	4 to 1	2019-04-24 13:59:33	2019-04-24 16:46:11	2:46:38	-
Round 1	0	Passage	1 to 4	2019-04-25 10:00:39	2019-04-25 15:44:39	5:44:00	-
Round 1	0	Passage	5 to 8	2019-04-25 16:31:28	2019-04-25 22:14:27	5:42:59	-
Round 1	1	RPE differentiation	1 to 4	2019-04-26 11:03:13	2019-04-26 14:53:11	3:49:58	-
Round 1	1	RPE differentiation	5 to 8	2019-04-26 15:14:08	2019-04-26 19:09:21	3:55:13	-
Round 1	2	RPE differentiation	8 to 5	2019-04-27 10:45:19	2019-04-27 14:38:28	3:53:09	-
Round 1	2	RPE differentiation	4 to 1	2019-04-27 14:56:29	2019-04-27 18:44:53	3:48:24	-
Round 1	3	RPE differentiation	1 to 4	2019-04-28 11:06:14	2019-04-28 14:51:31	3:45:17	-
Round 1	3	RPE differentiation	5 to 8	2019-04-28 15:11:37	2019-04-28 19:00:29	3:48:52	-
Round 1	4	RPE differentiation	8 to 5	2019-04-29 10:35:44	2019-04-29 14:19:20	3:43:36	-
Round 1	4	RPE differentiation	4 to 1	2019-04-29 14:34:45	2019-04-29 18:21:40	3:46:55	Micropipet tip loading error
Round 1	5	RPE differentiation	1 to 4	2019-04-30 10:23:46	2019-04-30 14:00:16	3:36:30	-
Round 1	5	RPE differentiation	5 to 8	2019-04-30 14:22:26	2019-04-30 17:58:38	3:36:12	Micropipet tip loading error
Round 1	6	RPE differentiation	8 to 5	2019-05-01 10:20:57	2019-05-01 13:51:48	3:30:51	-
Round 1	6	RPE differentiation	4 to 1	2019-05-01 14:07:19	2019-05-01 17:44:17	3:36:58	-
Round 1	7	RPE differentiation	1 to 4	2019-05-02 11:49:40	2019-05-02 15:23:40	3:34:00	-
Round 1	7	RPE differentiation	5 to 8	2019-05-02 15:38:03	2019-05-02 19:46:03	4:08:00	Microscope error
Round 1	8	RPE differentiation	8 to 5	2019-05-03 11:10:58	2019-05-03 14:36:35	3:25:37	-
Round 1	8	RPE differentiation	4 to 1	2019-05-03 14:56:27	2019-05-03 18:24:53	3:28:26	-
Round 1	9	RPE differentiation	1 to 4	2019-05-04 12:27:22	2019-05-04 15:52:27	3:25:05	-
Round 1	9	RPE differentiation	5 to 8	2019-05-04 16:06:13	2019-05-04 19:26:36	3:20:23	Micropipet tip loading error
Round 1	10	RPE differentiation	8 to 5	2019-05-05 11:22:46	2019-05-05 14:39:21	3:16:35	-
Round 1	10	RPE differentiation	4 to 1	2019-05-05 14:53:39	2019-05-05 18:13:57	3:20:18	-
Round 1	11	RPE differentiation	1 to 4	2019-05-06 11:03:43	2019-05-06 14:18:02	3:14:19	-
Round 1	11	RPE differentiation	5 to 8	2019-05-06 14:34:48	2019-05-06 17:48:26	3:13:38	-
Round 1	12	RPE differentiation	8 to 5	2019-05-07 10:46:31	2019-05-07 13:54:26	3:07:55	-
Round 1	12	RPE differentiation	4 to 1	2019-05-07 14:16:57	2019-05-07 17:22:22	3:05:25	-
Round 1	13	RPE differentiation	1 to 4	2019-05-08 11:09:22	2019-05-08 14:10:08	3:00:46	-
Round 1	13	RPE differentiation	5 to 8	2019-05-08 14:23:51	2019-05-08 17:28:12	3:04:21	-
Round 1	14	RPE differentiation	8 to 5	2019-05-09 11:00:10	2019-05-09 13:58:53	2:58:43	-
Round 1	14	RPE differentiation	4 to 1	2019-05-09 14:12:53	2019-05-09 17:10:04	2:57:11	-
Round 1	15	RPE differentiation	1 to 4	2019-05-10 11:28:45	2019-05-10 14:23:09	2:54:24	-
Round 1	15	RPE differentiation	5 to 8	2019-05-10 14:40:10	2019-05-10 17:35:10	2:55:00	-
Round 1	16	RPE differentiation	8 to 5	2019-05-11 11:09:12	2019-05-11 14:02:03	2:52:51	-
Round 1	16	RPE differentiation	4 to 1	2019-05-11 14:14:49	2019-05-11 17:04:09	2:49:20	-
Round 1	17	RPE differentiation	1 to 4	2019-05-12 11:17:24	2019-05-12 14:00:06	2:42:42	-
Round 1	17	RPE differentiation	5 to 8	2019-05-12 14:14:23	2019-05-12 17:02:58	2:48:35	-
Round 1	18	RPE differentiation	8 to 5	2019-05-13 11:14:38	2019-05-13 13:54:07	2:39:29	-
Round 1	18	RPE differentiation	4 to 1	2019-05-13 14:08:24	2019-05-13 16:51:46	2:43:22	-
Round 1	19	RPE differentiation	1 to 4	2019-05-14 10:47:52	2019-05-14 13:28:10	2:40:18	-
Round 1	19	RPE differentiation	5 to 8	2019-05-14 13:39:32	2019-05-14 16:17:52	2:38:20	-
Round 1	20	RPE differentiation	8 to 5	2019-05-15 10:41:33	2019-05-15 12:49:04	2:07:31	Microscope error
Round 1	20	RPE differentiation	4 to 1	2019-05-15 12:52:38	2019-05-15 14:40:33	1:47:55	-
Round 1	21	RPE differentiation	1 to 4	2019-05-16 10:49:00	2019-05-16 12:37:02	1:48:02	-
Round 1	21	RPE differentiation	5 to 8	2019-05-16 12:39:44	2019-05-16 14:27:38	1:47:54	-
Round 1	22	RPE differentiation	8 to 5	2019-05-17 10:36:09	2019-05-17 12:24:33	1:48:24	-
Round 1	22	RPE differentiation	4 to 1	2019-05-17 12:32:36	2019-05-17 14:21:25	1:48:49	-
Round 1	23	RPE differentiation	1 to 4	2019-05-18 11:45:26	2019-05-18 13:33:01	1:47:35	-
Round 1	23	RPE differentiation	5 to 8	2019-05-18 13:57:57	2019-05-18 15:46:24	1:48:27	-
Round 1	24	RPE differentiation	8 to 5	2019-05-19 12:10:03	2019-05-19 13:57:52	1:47:49	-
Round 1	24	RPE differentiation	4 to 1	2019-05-19 14:09:03	2019-05-19 15:57:58	1:48:55	-
Round 1	25	RPE differentiation	1 to 4	2019-05-20 10:23:49	2019-05-20 13:22:28	2:58:39	HDD for microscope PC error
Round 1	25	RPE differentiation	5 to 8	2019-05-20 14:33:42	2019-05-20 16:06:50	1:33:08	HDD for microscope PC error
Round 1	26	RPE maintenance	8 to 5	2019-05-21 10:43:02	2019-05-21 12:30:52	1:47:50	-
Round 1	26	RPE maintenance	4 to 1	2019-05-21 12:35:08	2019-05-21 14:23:15	1:48:07	-
Round 1	28	RPE maintenance	1 to 4	2019-05-23 10:27:32	2019-05-23 12:15:19	1:47:47	-
Round 1	28	RPE maintenance	5 to 8	2019-05-23 12:20:06	2019-05-23 14:02:00	1:41:54	-
Round 1	30	RPE maintenance	8 to 5	2019-05-25 11:19:43	2019-05-25 13:07:38	1:47:55	-
Round 1	30	RPE maintenance	4 to 1	2019-05-25 13:20:54	2019-05-25 15:08:39	1:47:45	-
Round 1	32	RPE maintenance	1 to 4	2019-05-27 11:20:59	2019-05-27 13:08:24	1:47:25	-
Round 1	32	RPE maintenance	5 to 8	2019-05-27 13:11:12	2019-05-27 14:58:17	1:47:05	-
Round 2	-7	Seeding	4 to 1, 8 to 5	2019-07-05 12:13:58	2019-07-05 14:02:26	1:48:28	-
Round 2	-6	Preconditioning	1 to 4	2019-07-06 12:37:47	2019-07-06 15:29:57	2:52:10	-
Round 2	-6	Preconditioning	5 to 8	2019-07-06 15:42:20	2019-07-06 18:34:12	2:51:52	-
Round 2	-5	Preconditioning	8 to 5	2019-07-07 11:59:55	2019-07-07 14:52:32	2:52:37	-
Round 2	-5	Preconditioning	4 to 1	2019-07-07 15:06:29	2019-07-07 18:06:35	3:00:06	-
Round 2	-4	Preconditioning	1 to 4	2019-07-08 10:50:01	2019-07-08 14:02:48	3:12:47	-
Round 2	-4	Preconditioning	5 to 8	2019-07-08 14:16:30	2019-07-08 17:10:29	2:53:59	-
Round 2	-3	Preconditioning	8 to 5	2019-07-09 10:51:04	2019-07-09 13:47:44	2:56:40	-
Round 2	-3	Preconditioning	4 to 1	2019-07-09 14:01:09	2019-07-09 17:47:02	3:45:53	Microscope error
Round 2	-2	Preconditioning	1 to 4	2019-07-10 10:45:28	2019-07-10 14:22:52	3:37:24	Microscope error
Round 2	-2	Preconditioning	5 to 8	2019-07-10 14:35:27	2019-07-10 17:34:50	2:59:23	-
Round 2	-1	Preconditioning	8 to 5	2019-07-11 11:11:05	2019-07-11 14:05:03	2:53:58	-
Round 2	-1	Preconditioning	4 to 1	2019-07-11 14:19:25	2019-07-11 17:50:07	3:30:42	-
Round 2	0	Passage	1 to 4	2019-07-12 09:52:09	2019-07-12 15:32:04	5:39:55	-
Round 2	0	Passage	5 to 8	2019-07-12 16:21:53	2019-07-12 22:01:45	5:39:52	-
Round 2	1	RPE differentiation	1 to 4	2019-07-13 11:39:30	2019-07-13 15:34:40	3:55:10	-
Round 2	1	RPE differentiation	5 to 8	2019-07-13 15:51:55	2019-07-13 19:39:46	3:47:51	-
Round 2	2	RPE differentiation	8 to 5	2019-07-14 11:42:19	2019-07-14 15:29:58	3:47:39	-
Round 2	2	RPE differentiation	4 to 1	2019-07-14 15:46:01	2019-07-14 19:39:59	3:53:58	-
Round 2	3	RPE differentiation	1 to 4	2019-07-15 11:58:25	2019-07-15 15:48:11	3:49:46	-
Round 2	3	RPE differentiation	5 to 8	2019-07-15 16:23:15	2019-07-15 20:07:39	3:44:24	-
Round 2	4	RPE differentiation	8 to 5	2019-07-16 11:48:14	2019-07-16 15:25:54	3:37:40	-
Round 2	4	RPE differentiation	4 to 1	2019-07-16 15:44:54	2019-07-16 19:38:34	3:53:40	-
Round 2	5	RPE differentiation	1 to 4	2019-07-17 12:02:00	2019-07-17 15:41:33	3:39:33	-
Round 2	5	RPE differentiation	5 to 8	2019-07-17 15:59:59	2019-07-17 19:33:51	3:33:52	-
Round 2	6	RPE differentiation	8 to 5	2019-07-18 11:14:42	2019-07-18 14:42:16	3:27:34	-
Round 2	6	RPE differentiation	4 to 1	2019-07-18 15:11:44	2019-07-18 18:51:06	3:39:22	-
Round 2	7	RPE differentiation	1 to 4	2019-07-19 11:13:50	2019-07-19 14:56:27	3:42:37	-
Round 2	7	RPE differentiation	5 to 8	2019-07-19 15:16:34	2019-07-19 18:43:52	3:27:18	-
Round 2	8	RPE differentiation	8 to 5	2019-07-20 11:29:35	2019-07-20 14:57:45	3:28:10	-
Round 2	8	RPE differentiation	4 to 1	2019-07-20 15:50:29	2019-07-20 19:23:04	3:32:35	-
Round 2	9	RPE differentiation	1 to 4	2019-07-21 11:29:51	2019-07-21 14:59:10	3:29:19	-
Round 2	9	RPE differentiation	5 to 8	2019-07-21 15:20:13	2019-07-21 18:41:38	3:21:25	-
Round 2	10	RPE differentiation	8 to 5	2019-07-22 11:23:57	2019-07-22 14:42:57	3:19:00	-
Round 2	10	RPE differentiation	4 to 1	2019-07-22 14:57:36	2019-07-22 18:29:12	3:31:36	-
Round 2	11	RPE differentiation	1 to 4	2019-07-23 11:06:03	2019-07-23 14:40:34	3:34:31	Human error
Round 2	11	RPE differentiation	5 to 8	2019-07-23 15:02:19	2019-07-23 18:13:29	3:11:10	-
Round 2	12	RPE differentiation	8 to 5	2019-07-24 11:08:29	2019-07-24 14:21:30	3:13:01	-
Round 2	12	RPE differentiation	4 to 1	2019-07-24 14:38:04	2019-07-24 17:56:27	3:18:23	-
Round 2	13	RPE differentiation	1 to 4	2019-07-25 11:50:41	2019-07-25 15:07:52	3:17:11	-
Round 2	13	RPE differentiation	5 to 8	2019-07-25 15:32:25	2019-07-25 18:39:43	3:07:18	-
Round 2	14	RPE differentiation	8 to 5	2019-07-26 11:04:57	2019-07-26 14:11:04	3:06:07	-
Round 2	14	RPE differentiation	4 to 1	2019-07-26 14:26:17	2019-07-26 17:38:10	3:11:53	-
Round 2	15	RPE differentiation	1 to 4	2019-07-27 11:13:59	2019-07-27 14:24:03	3:10:04	-
Round 2	15	RPE differentiation	5 to 8	2019-07-27 14:44:33	2019-07-27 17:49:16	3:04:43	-
Round 2	16	RPE differentiation	8 to 5	2019-07-28 11:06:32	2019-07-28 14:19:05	3:12:33	Human error
Round 2	16	RPE differentiation	4 to 1	2019-07-28 14:33:43	2019-07-28 17:37:40	3:03:57	-
Round 2	17	RPE differentiation	1 to 4	2019-07-29 13:00:38	2019-07-29 16:02:53	3:02:15	-
Round 2	17	RPE differentiation	5 to 8	2019-07-29 16:17:44	2019-07-29 19:12:41	2:54:57	-
Round 2	18	RPE differentiation	8 to 5	2019-07-30 11:15:06	2019-07-30 14:00:02	2:44:56	-
Round 2	18	RPE differentiation	4 to 1	2019-07-30 14:14:24	2019-07-30 17:12:07	2:57:43	-
Round 2	19	RPE differentiation	1 to 4	2019-07-31 11:08:58	2019-07-31 13:51:09	2:42:11	-
Round 2	19	RPE differentiation	5 to 8	2019-07-31 14:03:03	2019-07-31 16:44:12	2:41:09	-
Round 2	20	RPE differentiation	8 to 5	2019-08-01 11:15:57	2019-08-01 13:03:06	1:47:09	-
Round 2	20	RPE differentiation	4 to 1	2019-08-01 13:06:24	2019-08-01 14:54:13	1:47:49	-
Round 2	21	RPE differentiation	1 to 4	2019-08-02 11:14:00	2019-08-02 13:02:07	1:48:07	-
Round 2	21	RPE differentiation	5 to 8	2019-08-02 13:04:57	2019-08-02 14:53:15	1:48:18	-
Round 2	22	RPE differentiation	8 to 5	2019-08-03 12:14:11	2019-08-03 14:02:17	1:48:06	-
Round 2	22	RPE differentiation	4 to 1	2019-08-03 14:27:08	2019-08-03 16:15:12	1:48:04	-
Round 2	23	RPE differentiation	1 to 4	2019-08-04 11:19:55	2019-08-04 13:08:08	1:48:13	-
Round 2	23	RPE differentiation	5 to 8	2019-08-04 13:11:15	2019-08-04 14:59:14	1:47:59	-
Round 2	24	RPE differentiation	8 to 5	2019-08-05 11:15:04	2019-08-05 13:03:23	1:48:19	-
Round 2	24	RPE differentiation	4 to 1	2019-08-05 13:07:05	2019-08-05 14:55:22	1:48:17	-
Round 2	25	RPE differentiation	1 to 4	2019-08-06 11:10:12	2019-08-06 12:58:22	1:48:10	-
Round 2	25	RPE differentiation	5 to 8	2019-08-06 13:02:11	2019-08-06 14:50:27	1:48:16	-
Round 2	26	RPE maintenance	8 to 5	2019-08-07 11:17:07	2019-08-07 13:05:18	1:48:11	-
Round 2	26	RPE maintenance	4 to 1	2019-08-07 13:08:59	2019-08-07 14:56:37	1:47:38	-
Round 2	28	RPE maintenance	1 to 4	2019-08-09 11:07:57	2019-08-09 12:56:19	1:48:22	-
Round 2	28	RPE maintenance	5 to 8	2019-08-09 13:00:08	2019-08-09 14:48:23	1:48:15	-
Round 2	30	RPE maintenance	8 to 5	2019-08-11 11:36:18	2019-08-11 13:24:17	1:47:59	-
Round 2	30	RPE maintenance	4 to 1	2019-08-11 13:28:48	2019-08-11 15:16:20	1:47:32	-
Round 2	32	RPE maintenance	1 to 4	2019-08-13 11:01:08	2019-08-13 12:48:29	1:47:21	-
Round 2	32	RPE maintenance	5 to 8	2019-08-13 12:51:17	2019-08-13 14:39:31	1:48:14	-
Round 3	-7	Seeding	4 to 1, 8 to 5	2020-01-23 12:14:11	2020-01-23 14:02:42	1:48:31	-
Round 3	-6	Preconditioning	1 to 4	2020-01-24 12:17:19	2020-01-24 14:35:29	2:18:10	-
Round 3	-6	Preconditioning	5 to 8	2020-01-24 14:51:09	2020-01-24 17:11:29	2:20:20	-
Round 3	-5	Preconditioning	8 to 5	2020-01-25 10:30:07	2020-01-25 13:17:00	2:46:53	-
Round 3	-5	Preconditioning	4 to 1	2020-01-25 13:30:34	2020-01-25 16:19:06	2:48:32	-
Round 3	-4	Preconditioning	1 to 4	2020-01-26 12:26:20	2020-01-26 15:15:04	2:48:44	-
Round 3	-4	Preconditioning	5 to 8	2020-01-26 15:42:40	2020-01-26 18:29:27	2:46:47	-
Round 3	-3	Preconditioning	8 to 5	2020-01-27 11:20:00	2020-01-27 14:06:37	2:46:37	-
Round 3	-3	Preconditioning	4 to 1	2020-01-27 14:36:26	2020-01-27 17:24:48	2:48:22	-
Round 3	-2	Preconditioning	1 to 4	2020-01-28 10:47:01	2020-01-28 13:35:08	2:48:07	-
Round 3	-2	Preconditioning	5 to 8	2020-01-28 13:52:28	2020-01-28 16:39:04	2:46:36	-
Round 3	-1	Preconditioning	8 to 5	2020-01-29 10:34:00	2020-01-29 13:20:50	2:46:50	-
Round 3	-1	Preconditioning	4 to 1	2020-01-29 13:38:20	2020-01-29 16:26:34	2:48:14	-
Round 3	0	Passage	1 to 4	2020-01-30 10:12:02	2020-01-30 15:03:27	4:51:25	-
Round 3	0	Passage	5 to 8	2020-01-30 16:08:40	2020-01-30 20:59:38	4:50:58	-
Round 3	1	RPE differentiation	1 to 4	2020-01-31 11:30:25	2020-01-31 15:16:44	3:46:19	-
Round 3	1	RPE differentiation	5 to 8	2020-01-31 15:45:29	2020-01-31 19:30:05	3:44:36	-
Round 3	2	RPE differentiation	8 to 5	2020-02-01 10:09:19	2020-02-01 13:52:04	3:42:45	-
Round 3	2	RPE differentiation	4 to 1	2020-02-01 14:11:49	2020-02-01 17:55:03	3:43:14	-
Round 3	3	RPE differentiation	1 to 4	2020-02-02 11:38:24	2020-02-02 15:20:01	3:41:37	-
Round 3	3	RPE differentiation	5 to 8	2020-02-02 16:01:22	2020-02-02 19:46:28	3:45:06	-
Round 3	4	RPE differentiation	8 to 5	2020-02-03 12:10:35	2020-02-03 15:53:17	3:42:42	-
Round 3	4	RPE differentiation	4 to 1	2020-02-03 16:12:03	2020-02-03 20:01:30	3:49:27	-
Round 3	5	RPE differentiation	1 to 4	2020-02-04 10:48:49	2020-02-04 14:32:21	3:43:32	-
Round 3	5	RPE differentiation	5 to 8	2020-02-04 14:51:07	2020-02-04 18:26:28	3:35:21	-
Round 3	6	RPE differentiation	8 to 5	2020-02-05 10:47:33	2020-02-05 14:15:17	3:27:44	-
Round 3	6	RPE differentiation	4 to 1	2020-02-05 15:02:00	2020-02-05 18:34:28	3:32:28	-
Round 3	7	RPE differentiation	1 to 4	2020-02-06 10:57:14	2020-02-06 14:34:23	3:37:09	-
Round 3	7	RPE differentiation	5 to 8	2020-02-06 14:50:40	2020-02-06 18:19:29	3:28:49	-
Round 3	8	RPE differentiation	8 to 5	2020-02-07 10:49:46	2020-02-07 14:21:17	3:31:31	-
Round 3	8	RPE differentiation	4 to 1	2020-02-07 14:41:38	2020-02-07 18:19:31	3:37:53	-
Round 3	9	RPE differentiation	1 to 4	2020-02-08 12:17:03	2020-02-08 15:47:23	3:30:20	-
Round 3	9	RPE differentiation	5 to 8	2020-02-08 16:07:54	2020-02-08 19:39:30	3:31:36	-
Round 3	10	RPE differentiation	8 to 5	2020-02-09 12:12:10	2020-02-09 15:42:21	3:30:11	-
Round 3	10	RPE differentiation	4 to 1	2020-02-09 16:19:02	2020-02-09 19:44:19	3:25:17	-
Round 3	11	RPE differentiation	1 to 4	2020-02-10 11:04:03	2020-02-10 14:20:52	3:16:49	-
Round 3	11	RPE differentiation	5 to 8	2020-02-10 14:38:01	2020-02-10 17:59:34	3:21:33	-
Round 3	12	RPE differentiation	8 to 5	2020-02-11 10:29:51	2020-02-11 13:49:54	3:20:03	-
Round 3	12	RPE differentiation	4 to 1	2020-02-11 14:06:17	2020-02-11 17:26:52	3:20:35	-
Round 3	13	RPE differentiation	1 to 4	2020-02-12 11:13:48	2020-02-12 14:30:45	3:16:57	-
Round 3	13	RPE differentiation	5 to 8	2020-02-12 14:56:06	2020-02-12 18:14:33	3:18:27	-
Round 3	14	RPE differentiation	8 to 5	2020-02-13 10:48:58	2020-02-13 14:01:34	3:12:36	-
Round 3	14	RPE differentiation	4 to 1	2020-02-13 14:19:19	2020-02-13 17:31:45	3:12:26	-
Round 3	15	RPE differentiation	1 to 4	2020-02-14 10:56:44	2020-02-14 14:10:38	3:13:54	-
Round 3	15	RPE differentiation	5 to 8	2020-02-14 14:38:41	2020-02-14 17:50:15	3:11:34	-
Round 3	16	RPE differentiation	8 to 5	2020-02-15 12:00:36	2020-02-15 15:06:18	3:05:42	-
Round 3	16	RPE differentiation	4 to 1	2020-02-15 15:27:23	2020-02-15 18:31:39	3:04:16	-
Round 3	17	RPE differentiation	1 to 4	2020-02-16 11:21:51	2020-02-16 14:20:40	2:58:49	-
Round 3	17	RPE differentiation	5 to 8	2020-02-16 15:26:58	2020-02-16 18:21:43	2:54:45	-
Round 3	18	RPE differentiation	8 to 5	2020-02-17 10:36:42	2020-02-17 13:09:04	2:32:22	-
Round 3	18	RPE differentiation	4 to 1	2020-02-17 13:22:34	2020-02-17 15:57:49	2:35:15	-
Round 3	19	RPE differentiation	1 to 4	2020-02-18 11:04:49	2020-02-18 13:36:47	2:31:58	-
Round 3	19	RPE differentiation	5 to 8	2020-02-18 14:01:25	2020-02-18 16:31:50	2:30:25	-
Round 3	20	RPE differentiation	8 to 5	2020-02-19 10:48:18	2020-02-19 12:25:46	1:37:28	-
Round 3	20	RPE differentiation	4 to 1	2020-02-19 12:32:42	2020-02-19 14:12:55	1:40:13	-
Round 3	21	RPE differentiation	1 to 4	2020-02-20 11:00:04	2020-02-20 12:39:46	1:39:42	-
Round 3	21	RPE differentiation	5 to 8	2020-02-20 12:57:08	2020-02-20 14:35:49	1:38:41	-
Round 3	22	RPE differentiation	8 to 5	2020-02-21 11:15:01	2020-02-21 12:53:42	1:38:41	-
Round 3	22	RPE differentiation	4 to 1	2020-02-21 13:19:54	2020-02-21 14:58:56	1:39:02	-
Round 3	23	RPE differentiation	1 to 4	2020-02-22 11:14:10	2020-02-22 12:53:50	1:39:40	-
Round 3	23	RPE differentiation	5 to 8	2020-02-22 13:02:20	2020-02-22 14:39:52	1:37:32	-
Round 3	24	RPE differentiation	8 to 5	2020-02-23 11:54:56	2020-02-23 13:32:46	1:37:50	-
Round 3	24	RPE differentiation	4 to 1	2020-02-23 13:56:51	2020-02-23 15:36:55	1:40:04	-
Round 3	25	RPE differentiation	1 to 4	2020-02-24 11:47:49	2020-02-24 13:28:01	1:40:12	-
Round 3	25	RPE differentiation	5 to 8	2020-02-24 13:48:53	2020-02-24 15:22:06	1:33:13	-
Round 3	26	RPE maintenance	8 to 5	2020-02-25 10:51:04	2020-02-25 12:28:52	1:37:48	-
Round 3	26	RPE maintenance	4 to 1	2020-02-25 12:50:19	2020-02-25 14:29:00	1:38:41	-
Round 3	28	RPE maintenance	1 to 4	2020-02-27 10:47:29	2020-02-27 12:27:10	1:39:41	-
Round 3	28	RPE maintenance	5 to 8	2020-02-27 13:20:27	2020-02-27 14:58:11	1:37:44	-
Round 3	30	RPE maintenance	8 to 5	2020-02-29 11:09:03	2020-02-29 12:47:54	1:38:51	-
Round 3	30	RPE maintenance	4 to 1	2020-02-29 12:52:16	2020-02-29 14:31:08	1:38:52	-
Round 3	32	RPE maintenance	1 to 4	2020-03-02 10:55:35	2020-03-02 12:35:13	1:39:38	-
Round 3	32	RPE maintenance	5 to 8	2020-03-02 12:40:00	2020-03-02 14:18:08	1:38:08	-
Validation	-7	Seeding	4 to 1, 8 to 5	2020-03-19 12:08:21	2020-03-19 13:56:49	1:48:28	-
Validation	-6	Preconditioning	1 to 4	2020-03-20 12:21:02	2020-03-20 14:40:31	2:19:29	-
Validation	-6	Preconditioning	5 to 8	2020-03-20 14:52:24	2020-03-20 17:11:03	2:18:39	-
Validation	-5	Preconditioning	8 to 5	2020-03-21 11:21:43	2020-03-21 13:49:58	2:28:15	-
Validation	-5	Preconditioning	4 to 1	2020-03-21 14:39:40	2020-03-21 17:08:07	2:28:27	-
Validation	-4	Preconditioning	1 to 4	2020-03-22 11:41:00	2020-03-22 14:09:42	2:28:42	-
Validation	-4	Preconditioning	5 to 8	2020-03-22 14:24:09	2020-03-22 16:52:43	2:28:34	-
Validation	-3	Preconditioning	8 to 5	2020-03-23 11:02:28	2020-03-23 13:30:41	2:28:13	-
Validation	-3	Preconditioning	4 to 1	2020-03-23 13:45:00	2020-03-23 16:13:54	2:28:54	-
Validation	-2	Preconditioning	1 to 4	2020-03-24 10:54:41	2020-03-24 13:22:54	2:28:13	-
Validation	-2	Preconditioning	5 to 8	2020-03-24 13:35:32	2020-03-24 16:03:37	2:28:05	-
Validation	-1	Preconditioning	8 to 5	2020-03-25 10:51:01	2020-03-25 13:19:33	2:28:32	-
Validation	-1	Preconditioning	4 to 1	2020-03-25 13:32:00	2020-03-25 16:01:31	2:29:31	-
Validation	0	Passage	1 to 4	2020-03-26 09:50:33	2020-03-26 14:54:29	5:03:56	-
Validation	0	Passage	5 to 8	2020-03-26 15:58:43	2020-03-26 21:02:35	5:03:52	-
Validation	1	RPE differentiation	1 to 4	2020-03-27 11:03:34	2020-03-27 14:32:45	3:29:11	-
Validation	1	RPE differentiation	5 to 8	2020-03-27 14:45:31	2020-03-27 18:13:14	3:27:43	-
Validation	2	RPE differentiation	8 to 5	2020-03-28 11:09:54	2020-03-28 14:36:49	3:26:55	-
Validation	2	RPE differentiation	4 to 1	2020-03-28 15:09:07	2020-03-28 18:36:40	3:27:33	-
Validation	3	RPE differentiation	1 to 4	2020-03-29 11:18:54	2020-03-29 14:44:47	3:25:53	-
Validation	3	RPE differentiation	5 to 8	2020-03-29 15:10:41	2020-03-29 18:36:30	3:25:49	-
Validation	4	RPE differentiation	8 to 5	2020-03-30 10:58:35	2020-03-30 14:16:32	3:17:57	-
Validation	4	RPE differentiation	4 to 1	2020-03-30 14:30:35	2020-03-30 17:49:07	3:18:32	-
Validation	5	RPE differentiation	1 to 4	2020-03-31 10:42:54	2020-03-31 13:54:05	3:11:11	-
Validation	5	RPE differentiation	5 to 8	2020-03-31 14:09:58	2020-03-31 17:20:02	3:10:04	-
Validation	6	RPE differentiation	8 to 5	2020-04-01 10:42:30	2020-04-01 13:51:42	3:09:12	-
Validation	6	RPE differentiation	4 to 1	2020-04-01 14:03:21	2020-04-01 17:13:11	3:09:50	-
Validation	7	RPE differentiation	1 to 4	2020-04-02 10:45:16	2020-04-02 13:58:42	3:13:26	-
Validation	7	RPE differentiation	5 to 8	2020-04-02 14:13:40	2020-04-02 17:26:39	3:12:59	-
Validation	8	RPE differentiation	8 to 5	2020-04-03 10:57:42	2020-04-03 14:07:54	3:10:12	-
Validation	8	RPE differentiation	4 to 1	2020-04-03 14:22:42	2020-04-03 17:32:11	3:09:29	-
Validation	9	RPE differentiation	1 to 4	2020-04-04 11:39:21	2020-04-04 14:50:54	3:11:33	-
Validation	9	RPE differentiation	5 to 8	2020-04-04 15:11:22	2020-04-04 18:22:00	3:10:38	-
Validation	10	RPE differentiation	8 to 5	2020-04-05 10:53:44	2020-04-05 14:01:48	3:08:04	-
Validation	10	RPE differentiation	4 to 1	2020-04-05 14:19:51	2020-04-05 17:27:56	3:08:05	-
Validation	11	RPE differentiation	1 to 4	2020-04-06 10:44:01	2020-04-06 13:50:03	3:06:02	-
Validation	11	RPE differentiation	5 to 8	2020-04-06 14:03:00	2020-04-06 17:08:10	3:05:10	-
Validation	12	RPE differentiation	8 to 5	2020-04-07 10:35:01	2020-04-07 13:32:56	2:57:55	-
Validation	12	RPE differentiation	4 to 1	2020-04-07 14:04:51	2020-04-07 17:01:06	2:56:15	-
Validation	13	RPE differentiation	1 to 4	2020-04-08 11:27:10	2020-04-08 14:21:01	2:53:51	-
Validation	13	RPE differentiation	5 to 8	2020-04-08 15:04:27	2020-04-08 17:58:07	2:53:40	-
Validation	14	RPE differentiation	8 to 5	2020-04-09 10:48:02	2020-04-09 13:37:57	2:49:55	-
Validation	14	RPE differentiation	4 to 1	2020-04-09 13:49:26	2020-04-09 16:40:07	2:50:41	-
Validation	15	RPE differentiation	1 to 4	2020-04-10 10:39:41	2020-04-10 13:35:35	2:55:54	Defective labware error
Validation	15	RPE differentiation	5 to 8	2020-04-10 13:47:27	2020-04-10 16:37:57	2:50:30	-
Validation	16	RPE differentiation	8 to 5	2020-04-11 11:07:36	2020-04-11 13:55:56	2:48:20	-
Validation	16	RPE differentiation	4 to 1	2020-04-11 14:24:46	2020-04-11 17:13:04	2:48:18	-
Validation	17	RPE differentiation	1 to 4	2020-04-12 10:59:29	2020-04-12 13:44:04	2:44:35	-
Validation	17	RPE differentiation	5 to 8	2020-04-12 14:00:25	2020-04-12 16:45:06	2:44:41	-
Validation	18	RPE differentiation	8 to 5	2020-04-13 11:17:36	2020-04-13 13:55:07	2:37:31	-
Validation	18	RPE differentiation	4 to 1	2020-04-13 14:17:37	2020-04-13 16:54:16	2:36:39	-
Validation	19	RPE differentiation	1 to 4	2020-04-14 09:59:29	2020-04-14 12:27:42	2:28:13	-
Validation	19	RPE differentiation	5 to 8	2020-04-14 12:40:42	2020-04-14 15:09:17	2:28:35	-
Validation	20	RPE differentiation	8 to 5	2020-04-15 12:34:37	2020-04-15 14:13:10	1:38:33	-
Validation	20	RPE differentiation	4 to 1	2020-04-15 14:48:03	2020-04-15 16:24:19	1:36:16	-
Validation	21	RPE differentiation	1 to 4	2020-04-16 11:04:38	2020-04-16 12:41:13	1:36:35	-
Validation	21	RPE differentiation	5 to 8	2020-04-16 13:16:09	2020-04-16 14:52:17	1:36:08	-
Validation	22	RPE differentiation	8 to 5	2020-04-17 10:50:08	2020-04-17 12:27:07	1:36:59	-
Validation	22	RPE differentiation	4 to 1	2020-04-17 12:45:59	2020-04-17 14:22:17	1:36:18	-
Validation	23	RPE differentiation	1 to 4	2020-04-18 11:04:36	2020-04-18 12:41:11	1:36:35	-
Validation	23	RPE differentiation	5 to 8	2020-04-18 13:16:05	2020-04-18 14:52:21	1:36:16	-
Validation	24	RPE differentiation	8 to 5	2020-04-19 10:58:06	2020-04-19 12:36:06	1:38:00	-
Validation	24	RPE differentiation	4 to 1	2020-04-19 12:41:16	2020-04-19 14:19:30	1:38:14	-
Validation	25	RPE differentiation	1 to 4	2020-04-20 11:04:36	2020-04-20 14:01:25	2:56:49	Microscope error
Validation	25	RPE differentiation	5 to 8	2020-04-20 14:36:20	2020-04-20 16:13:27	1:37:07	-
Validation	26	RPE maintenance	8 to 5	2020-04-21 11:06:08	2020-04-21 12:39:17	1:33:09	-
Validation	26	RPE maintenance	4 to 1	2020-04-21 12:42:56	2020-04-21 14:19:57	1:37:01	-
Validation	28	RPE maintenance	1 to 4	2020-04-23 11:12:10	2020-04-23 12:51:25	1:39:15	-
Validation	28	RPE maintenance	5 to 8	2020-04-23 12:54:42	2020-04-23 14:31:29	1:36:47	-
Validation	30	RPE maintenance	8 to 5	2020-04-25 11:45:49	2020-04-25 13:23:25	1:37:36	-
Validation	30	RPE maintenance	4 to 1	2020-04-25 13:28:38	2020-04-25 15:06:25	1:37:47	-
Validation	32	RPE maintenance	1 to 4	2020-04-27 10:43:29	2020-04-27 12:22:34	1:39:05	-
Validation	32	RPE maintenance	5 to 8	2020-04-27 12:25:00	2020-04-27 14:01:32	1:36:32	-
	0	0	00:00:00	00:00:00	00:00:00	0	0
	0	0	00:00:00	00:00:00	00:00:00	0	0
	0	0	00:00:00	00:00:00	00:00:00	0	0
	0	0	00:00:00	00:00:00	00:00:00	0	0
	0	0	00:00:00	00:00:00	00:00:00	0	0
	0	0	00:00:00	00:00:00	00:00:00	0	0
	0	0	00:00:00	00:00:00	00:00:00	0	0
	0	0	00:00:00	00:00:00	00:00:00	0	0

## Sheet: commands
Supplementary Table 7
Experiment	DDay	Category	Plate	Number of commands				Error detail
				Total	Complete	Error	Abort
Baseline	-7	Seeding	4 to 1, 8 to 5	89	89	0	0	-
Baseline	-6	Preconditioning	1 to 4	104	104	0	0	-
Baseline	-6	Preconditioning	5 to 8	104	104	0	0	-
Baseline	-5	Preconditioning	8 to 5	104	104	0	0	-
Baseline	-5	Preconditioning	4 to 1	104	104	0	0	-
Baseline	-4	Preconditioning	1 to 4	104	103	1	0	Microscope error
Baseline	-4	Preconditioning	5 to 8	104	104	0	0	-
Baseline	-3	Preconditioning	8 to 5	104	104	0	0	-
Baseline	-3	Preconditioning	4 to 1	104	104	0	0	-
Baseline	-2	Preconditioning	1 to 4	104	104	0	0	-
Baseline	-2	Preconditioning	5 to 8	104	104	0	0	-
Baseline	-1	Preconditioning	8 to 5	104	104	0	0	-
Baseline	-1	Preconditioning	4 to 1	104	104	0	0	-
Baseline	0	Passage	1 to 4	151	151	0	0	-
Baseline	0	Passage	5 to 8	151	151	0	0	-
Baseline	1	RPE differentiation	1 to 4	104	104	0	0	-
Baseline	1	RPE differentiation	5 to 8	104	104	0	0	-
Baseline	2	RPE differentiation	8 to 5	104	104	0	0	-
Baseline	2	RPE differentiation	4 to 1	104	104	0	0	-
Baseline	3	RPE differentiation	1 to 4	104	104	0	0	-
Baseline	3	RPE differentiation	5 to 8	104	104	0	0	-
Baseline	4	RPE differentiation	8 to 5	104	104	0	0	-
Baseline	4	RPE differentiation	4 to 1	104	104	0	0	-
Baseline	5	RPE differentiation	1 to 4	104	104	0	0	-
Baseline	5	RPE differentiation	5 to 8	104	104	0	0	-
Baseline	6	RPE differentiation	8 to 5	104	104	0	0	-
Baseline	6	RPE differentiation	4 to 1	104	104	0	0	-
Baseline	7	RPE differentiation	1 to 4	104	104	0	0	-
Baseline	7	RPE differentiation	5 to 8	104	104	0	0	-
Baseline	8	RPE differentiation	8 to 5	104	104	0	0	-
Baseline	8	RPE differentiation	4 to 1	104	104	0	0	-
Baseline	9	RPE differentiation	1 to 4	104	104	0	0	-
Baseline	9	RPE differentiation	5 to 8	104	104	0	0	-
Baseline	10	RPE differentiation	8 to 5	104	104	0	0	-
Baseline	10	RPE differentiation	4 to 1	104	104	0	0	-
Baseline	11	RPE differentiation	1 to 4	104	104	0	0	-
Baseline	11	RPE differentiation	5 to 8	104	104	0	0	-
Baseline	12	RPE differentiation	8 to 5	104	104	0	0	-
Baseline	12	RPE differentiation	4 to 1	104	104	0	0	-
Baseline	13	RPE differentiation	1 to 4	104	103	1	0	Microscope error
Baseline	13	RPE differentiation	5 to 8	104	103	1	0	Micropipet tip ejection error
Baseline	14	RPE differentiation	8 to 5	104	102	2	0	Micropipet tip ejection error (x2)
Baseline	14	RPE differentiation	4 to 1	104	101	3	0	Micropipet tip ejection error (x3)
Baseline	15	RPE differentiation	1 to 4	104	104	0	0	-
Baseline	15	RPE differentiation	5 to 8	104	104	0	0	-
Baseline	16	RPE differentiation	8 to 5	104	104	0	0	-
Baseline	16	RPE differentiation	4 to 1	104	104	0	0	-
Baseline	17	RPE differentiation	1 to 4	104	103	1	0	Human error
Baseline	17	RPE differentiation	5 to 8	104	104	0	0	-
Baseline	18	RPE differentiation	8 to 5	104	104	0	0	-
Baseline	18	RPE differentiation	4 to 1	104	104	0	0	-
Baseline	19	RPE differentiation	1 to 4	104	104	0	0	-
Baseline	19	RPE differentiation	5 to 8	104	104	0	0	-
Baseline	20	RPE differentiation	8 to 5	77	77	0	0	-
Baseline	20	RPE differentiation	4 to 1	77	76	1	0	HDD for microscope PC error
Baseline	21	RPE differentiation	1 to 4	77	77	0	0	-
Baseline	21	RPE differentiation	5 to 8	77	77	0	0	-
Baseline	22	RPE differentiation	8 to 5	77	77	0	0	-
Baseline	22	RPE differentiation	4 to 1	77	77	0	0	-
Baseline	23	RPE differentiation	1 to 4	77	77	0	0	-
Baseline	23	RPE differentiation	5 to 8	77	77	0	0	-
Baseline	24	RPE differentiation	8 to 5	77	77	0	0	-
Baseline	24	RPE differentiation	4 to 1	77	77	0	0	-
Baseline	25	RPE differentiation	1 to 4	77	77	0	0	-
Baseline	25	RPE differentiation	5 to 8	77	77	0	0	-
Baseline	26	RPE maintenance	8 to 5	77	77	0	0	-
Baseline	26	RPE maintenance	4 to 1	77	77	0	0	-
Baseline	28	RPE maintenance	1 to 4	77	77	0	0	-
Baseline	28	RPE maintenance	5 to 8	77	77	0	0	-
Baseline	30	RPE maintenance	8 to 5	77	77	0	0	-
Baseline	30	RPE maintenance	4 to 1	77	76	1	0	Micropipet tip ejection error
Baseline	32	RPE maintenance	1 to 4	77	77	0	0	-
Baseline	32	RPE maintenance	5 to 8	77	77	0	0	-
Round 1	-7	Seeding	4 to 1, 8 to 5	89	89	0	0	-
Round 1	-6	Preconditioning	1 to 4	193	193	0	0	-
Round 1	-6	Preconditioning	5 to 8	193	193	0	0	-
Round 1	-5	Preconditioning	8 to 5	193	193	0	0	-
Round 1	-5	Preconditioning	4 to 1	193	192	1	0	Micropipet tip loading error
Round 1	-4	Preconditioning	1 to 4	193	193	0	0	-
Round 1	-4	Preconditioning	5 to 8	193	193	0	0	-
Round 1	-3	Preconditioning	8 to 5	193	193	0	0	-
Round 1	-3	Preconditioning	4 to 1	193	193	0	0	-
Round 1	-2	Preconditioning	1 to 4	193	193	0	0	-
Round 1	-2	Preconditioning	5 to 8	193	193	0	0	-
Round 1	-1	Preconditioning	8 to 5	193	193	0	0	-
Round 1	-1	Preconditioning	4 to 1	193	193	0	0	-
Round 1	0	Passage	1 to 4	151	151	0	0	-
Round 1	0	Passage	5 to 8	151	151	0	0	-
Round 1	1	RPE differentiation	1 to 4	335	335	0	0	-
Round 1	1	RPE differentiation	5 to 8	335	335	0	0	-
Round 1	2	RPE differentiation	8 to 5	335	335	0	0	-
Round 1	2	RPE differentiation	4 to 1	335	335	0	0	-
Round 1	3	RPE differentiation	1 to 4	335	335	0	0	-
Round 1	3	RPE differentiation	5 to 8	335	335	0	0	-
Round 1	4	RPE differentiation	8 to 5	335	335	0	0	-
Round 1	4	RPE differentiation	4 to 1	335	334	1	0	Micropipet tip loading error
Round 1	5	RPE differentiation	1 to 4	335	335	0	0	-
Round 1	5	RPE differentiation	5 to 8	335	334	1	0	Micropipet tip loading error
Round 1	6	RPE differentiation	8 to 5	335	335	0	0	-
Round 1	6	RPE differentiation	4 to 1	335	335	0	0	-
Round 1	7	RPE differentiation	1 to 4	335	335	0	0	-
Round 1	7	RPE differentiation	5 to 8	335	334	1	0	Microscope error
Round 1	8	RPE differentiation	8 to 5	335	335	0	0	-
Round 1	8	RPE differentiation	4 to 1	335	335	0	0	-
Round 1	9	RPE differentiation	1 to 4	335	335	0	0	-
Round 1	9	RPE differentiation	5 to 8	335	334	1	0	Micropipet tip loading error
Round 1	10	RPE differentiation	8 to 5	335	335	0	0	-
Round 1	10	RPE differentiation	4 to 1	335	335	0	0	-
Round 1	11	RPE differentiation	1 to 4	335	335	0	0	-
Round 1	11	RPE differentiation	5 to 8	335	335	0	0	-
Round 1	12	RPE differentiation	8 to 5	335	335	0	0	-
Round 1	12	RPE differentiation	4 to 1	335	335	0	0	-
Round 1	13	RPE differentiation	1 to 4	335	335	0	0	-
Round 1	13	RPE differentiation	5 to 8	335	335	0	0	-
Round 1	14	RPE differentiation	8 to 5	335	335	0	0	-
Round 1	14	RPE differentiation	4 to 1	335	335	0	0	-
Round 1	15	RPE differentiation	1 to 4	335	335	0	0	-
Round 1	15	RPE differentiation	5 to 8	335	335	0	0	-
Round 1	16	RPE differentiation	8 to 5	335	335	0	0	-
Round 1	16	RPE differentiation	4 to 1	335	335	0	0	-
Round 1	17	RPE differentiation	1 to 4	335	335	0	0	-
Round 1	17	RPE differentiation	5 to 8	335	335	0	0	-
Round 1	18	RPE differentiation	8 to 5	335	335	0	0	-
Round 1	18	RPE differentiation	4 to 1	335	335	0	0	-
Round 1	19	RPE differentiation	1 to 4	335	335	0	0	-
Round 1	19	RPE differentiation	5 to 8	335	335	0	0	-
Round 1	20	RPE differentiation	8 to 5	77	76	1	0	Microscope error
Round 1	20	RPE differentiation	4 to 1	77	77	0	0	-
Round 1	21	RPE differentiation	1 to 4	77	77	0	0	-
Round 1	21	RPE differentiation	5 to 8	77	77	0	0	-
Round 1	22	RPE differentiation	8 to 5	77	77	0	0	-
Round 1	22	RPE differentiation	4 to 1	77	77	0	0	-
Round 1	23	RPE differentiation	1 to 4	77	77	0	0	-
Round 1	23	RPE differentiation	5 to 8	77	77	0	0	-
Round 1	24	RPE differentiation	8 to 5	77	77	0	0	-
Round 1	24	RPE differentiation	4 to 1	77	77	0	0	-
Round 1	25	RPE differentiation	1 to 4	77	73	1	3	HDD for microscope PC error
Round 1	25	RPE differentiation	5 to 8	77	76	1	0	HDD for microscope PC error
Round 1	26	RPE maintenance	8 to 5	77	77	0	0	-
Round 1	26	RPE maintenance	4 to 1	77	77	0	0	-
Round 1	28	RPE maintenance	1 to 4	77	77	0	0	-
Round 1	28	RPE maintenance	5 to 8	77	77	0	0	-
Round 1	30	RPE maintenance	8 to 5	77	77	0	0	-
Round 1	30	RPE maintenance	4 to 1	77	77	0	0	-
Round 1	32	RPE maintenance	1 to 4	77	77	0	0	-
Round 1	32	RPE maintenance	5 to 8	77	77	0	0	-
Round 2	-7	Seeding	4 to 1, 8 to 5	89	89	0	0	-
Round 2	-6	Preconditioning	1 to 4	193	193	0	0	-
Round 2	-6	Preconditioning	5 to 8	193	193	0	0	-
Round 2	-5	Preconditioning	8 to 5	193	193	0	0	-
Round 2	-5	Preconditioning	4 to 1	193	193	0	0	-
Round 2	-4	Preconditioning	1 to 4	193	193	0	0	-
Round 2	-4	Preconditioning	5 to 8	193	193	0	0	-
Round 2	-3	Preconditioning	8 to 5	193	193	0	0	-
Round 2	-3	Preconditioning	4 to 1	193	192	1	0	Microscope error
Round 2	-2	Preconditioning	1 to 4	193	192	1	0	Microscope error
Round 2	-2	Preconditioning	5 to 8	193	193	0	0	-
Round 2	-1	Preconditioning	8 to 5	193	193	0	0	-
Round 2	-1	Preconditioning	4 to 1	193	193	0	0	-
Round 2	0	Passage	1 to 4	151	151	0	0	-
Round 2	0	Passage	5 to 8	151	151	0	0	-
Round 2	1	RPE differentiation	1 to 4	335	335	0	0	-
Round 2	1	RPE differentiation	5 to 8	335	335	0	0	-
Round 2	2	RPE differentiation	8 to 5	335	335	0	0	-
Round 2	2	RPE differentiation	4 to 1	335	335	0	0	-
Round 2	3	RPE differentiation	1 to 4	335	335	0	0	-
Round 2	3	RPE differentiation	5 to 8	335	335	0	0	-
Round 2	4	RPE differentiation	8 to 5	335	335	0	0	-
Round 2	4	RPE differentiation	4 to 1	335	335	0	0	-
Round 2	5	RPE differentiation	1 to 4	335	335	0	0	-
Round 2	5	RPE differentiation	5 to 8	335	335	0	0	-
Round 2	6	RPE differentiation	8 to 5	335	335	0	0	-
Round 2	6	RPE differentiation	4 to 1	335	335	0	0	-
Round 2	7	RPE differentiation	1 to 4	335	335	0	0	-
Round 2	7	RPE differentiation	5 to 8	335	335	0	0	-
Round 2	8	RPE differentiation	8 to 5	335	335	0	0	-
Round 2	8	RPE differentiation	4 to 1	335	335	0	0	-
Round 2	9	RPE differentiation	1 to 4	335	335	0	0	-
Round 2	9	RPE differentiation	5 to 8	335	335	0	0	-
Round 2	10	RPE differentiation	8 to 5	335	335	0	0	-
Round 2	10	RPE differentiation	4 to 1	335	335	0	0	-
Round 2	11	RPE differentiation	1 to 4	335	334	1	0	Human error
Round 2	11	RPE differentiation	5 to 8	335	335	0	0	-
Round 2	12	RPE differentiation	8 to 5	335	335	0	0	-
Round 2	12	RPE differentiation	4 to 1	335	335	0	0	-
Round 2	13	RPE differentiation	1 to 4	335	335	0	0	-
Round 2	13	RPE differentiation	5 to 8	335	335	0	0	-
Round 2	14	RPE differentiation	8 to 5	335	335	0	0	-
Round 2	14	RPE differentiation	4 to 1	335	335	0	0	-
Round 2	15	RPE differentiation	1 to 4	335	335	0	0	-
Round 2	15	RPE differentiation	5 to 8	335	335	0	0	-
Round 2	16	RPE differentiation	8 to 5	335	334	1	0	Human error
Round 2	16	RPE differentiation	4 to 1	335	335	0	0	-
Round 2	17	RPE differentiation	1 to 4	335	335	0	0	-
Round 2	17	RPE differentiation	5 to 8	335	335	0	0	-
Round 2	18	RPE differentiation	8 to 5	335	335	0	0	-
Round 2	18	RPE differentiation	4 to 1	335	335	0	0	-
Round 2	19	RPE differentiation	1 to 4	335	335	0	0	-
Round 2	19	RPE differentiation	5 to 8	335	335	0	0	-
Round 2	20	RPE differentiation	8 to 5	77	77	0	0	-
Round 2	20	RPE differentiation	4 to 1	77	77	0	0	-
Round 2	21	RPE differentiation	1 to 4	77	77	0	0	-
Round 2	21	RPE differentiation	5 to 8	77	77	0	0	-
Round 2	22	RPE differentiation	8 to 5	77	77	0	0	-
Round 2	22	RPE differentiation	4 to 1	77	77	0	0	-
Round 2	23	RPE differentiation	1 to 4	77	77	0	0	-
Round 2	23	RPE differentiation	5 to 8	77	77	0	0	-
Round 2	24	RPE differentiation	8 to 5	77	77	0	0	-
Round 2	24	RPE differentiation	4 to 1	77	77	0	0	-
Round 2	25	RPE differentiation	1 to 4	77	77	0	0	-
Round 2	25	RPE differentiation	5 to 8	77	77	0	0	-
Round 2	26	RPE maintenance	8 to 5	77	77	0	0	-
Round 2	26	RPE maintenance	4 to 1	77	77	0	0	-
Round 2	28	RPE maintenance	1 to 4	77	77	0	0	-
Round 2	28	RPE maintenance	5 to 8	77	77	0	0	-
Round 2	30	RPE maintenance	8 to 5	77	77	0	0	-
Round 2	30	RPE maintenance	4 to 1	77	77	0	0	-
Round 2	32	RPE maintenance	1 to 4	77	77	0	0	-
Round 2	32	RPE maintenance	5 to 8	77	77	0	0	-
Round 3	-7	Seeding	4 to 1, 8 to 5	89	89	0	0	-
Round 3	-6	Preconditioning	1 to 4	193	193	0	0	-
Round 3	-6	Preconditioning	5 to 8	193	193	0	0	-
Round 3	-5	Preconditioning	8 to 5	193	193	0	0	-
Round 3	-5	Preconditioning	4 to 1	193	193	0	0	-
Round 3	-4	Preconditioning	1 to 4	193	193	0	0	-
Round 3	-4	Preconditioning	5 to 8	193	193	0	0	-
Round 3	-3	Preconditioning	8 to 5	193	193	0	0	-
Round 3	-3	Preconditioning	4 to 1	193	193	0	0	-
Round 3	-2	Preconditioning	1 to 4	193	193	0	0	-
Round 3	-2	Preconditioning	5 to 8	193	193	0	0	-
Round 3	-1	Preconditioning	8 to 5	193	193	0	0	-
Round 3	-1	Preconditioning	4 to 1	193	193	0	0	-
Round 3	0	Passage	1 to 4	151	151	0	0	-
Round 3	0	Passage	5 to 8	151	151	0	0	-
Round 3	1	RPE differentiation	1 to 4	335	335	0	0	-
Round 3	1	RPE differentiation	5 to 8	335	335	0	0	-
Round 3	2	RPE differentiation	8 to 5	335	335	0	0	-
Round 3	2	RPE differentiation	4 to 1	335	335	0	0	-
Round 3	3	RPE differentiation	1 to 4	335	335	0	0	-
Round 3	3	RPE differentiation	5 to 8	335	335	0	0	-
Round 3	4	RPE differentiation	8 to 5	335	335	0	0	-
Round 3	4	RPE differentiation	4 to 1	335	335	0	0	-
Round 3	5	RPE differentiation	1 to 4	335	335	0	0	-
Round 3	5	RPE differentiation	5 to 8	335	335	0	0	-
Round 3	6	RPE differentiation	8 to 5	335	335	0	0	-
Round 3	6	RPE differentiation	4 to 1	335	335	0	0	-
Round 3	7	RPE differentiation	1 to 4	335	335	0	0	-
Round 3	7	RPE differentiation	5 to 8	335	335	0	0	-
Round 3	8	RPE differentiation	8 to 5	335	335	0	0	-
Round 3	8	RPE differentiation	4 to 1	335	335	0	0	-
Round 3	9	RPE differentiation	1 to 4	335	335	0	0	-
Round 3	9	RPE differentiation	5 to 8	335	335	0	0	-
Round 3	10	RPE differentiation	8 to 5	335	335	0	0	-
Round 3	10	RPE differentiation	4 to 1	335	335	0	0	-
Round 3	11	RPE differentiation	1 to 4	335	335	0	0	-
Round 3	11	RPE differentiation	5 to 8	335	335	0	0	-
Round 3	12	RPE differentiation	8 to 5	335	335	0	0	-
Round 3	12	RPE differentiation	4 to 1	335	335	0	0	-
Round 3	13	RPE differentiation	1 to 4	335	335	0	0	-
Round 3	13	RPE differentiation	5 to 8	335	335	0	0	-
Round 3	14	RPE differentiation	8 to 5	335	335	0	0	-
Round 3	14	RPE differentiation	4 to 1	335	335	0	0	-
Round 3	15	RPE differentiation	1 to 4	335	335	0	0	-
Round 3	15	RPE differentiation	5 to 8	335	335	0	0	-
Round 3	16	RPE differentiation	8 to 5	335	335	0	0	-
Round 3	16	RPE differentiation	4 to 1	335	335	0	0	-
Round 3	17	RPE differentiation	1 to 4	335	335	0	0	-
Round 3	17	RPE differentiation	5 to 8	335	335	0	0	-
Round 3	18	RPE differentiation	8 to 5	335	335	0	0	-
Round 3	18	RPE differentiation	4 to 1	335	335	0	0	-
Round 3	19	RPE differentiation	1 to 4	335	335	0	0	-
Round 3	19	RPE differentiation	5 to 8	335	335	0	0	-
Round 3	20	RPE differentiation	8 to 5	77	77	0	0	-
Round 3	20	RPE differentiation	4 to 1	77	77	0	0	-
Round 3	21	RPE differentiation	1 to 4	77	77	0	0	-
Round 3	21	RPE differentiation	5 to 8	77	77	0	0	-
Round 3	22	RPE differentiation	8 to 5	77	77	0	0	-
Round 3	22	RPE differentiation	4 to 1	77	77	0	0	-
Round 3	23	RPE differentiation	1 to 4	77	77	0	0	-
Round 3	23	RPE differentiation	5 to 8	77	77	0	0	-
Round 3	24	RPE differentiation	8 to 5	77	77	0	0	-
Round 3	24	RPE differentiation	4 to 1	77	77	0	0	-
Round 3	25	RPE differentiation	1 to 4	77	77	0	0	-
Round 3	25	RPE differentiation	5 to 8	77	77	0	0	-
Round 3	26	RPE maintenance	8 to 5	77	77	0	0	-
Round 3	26	RPE maintenance	4 to 1	77	77	0	0	-
Round 3	28	RPE maintenance	1 to 4	77	77	0	0	-
Round 3	28	RPE maintenance	5 to 8	77	77	0	0	-
Round 3	30	RPE maintenance	8 to 5	77	77	0	0	-
Round 3	30	RPE maintenance	4 to 1	77	77	0	0	-
Round 3	32	RPE maintenance	1 to 4	77	77	0	0	-
Round 3	32	RPE maintenance	5 to 8	77	77	0	0	-
Validation	-7	Seeding	4 to 1, 8 to 5	89	89	0	0	-
Validation	-6	Preconditioning	1 to 4	193	193	0	0	-
Validation	-6	Preconditioning	5 to 8	193	193	0	0	-
Validation	-5	Preconditioning	8 to 5	193	193	0	0	-
Validation	-5	Preconditioning	4 to 1	193	193	0	0	-
Validation	-4	Preconditioning	1 to 4	193	193	0	0	-
Validation	-4	Preconditioning	5 to 8	193	193	0	0	-
Validation	-3	Preconditioning	8 to 5	193	193	0	0	-
Validation	-3	Preconditioning	4 to 1	193	193	0	0	-
Validation	-2	Preconditioning	1 to 4	193	193	0	0	-
Validation	-2	Preconditioning	5 to 8	193	193	0	0	-
Validation	-1	Preconditioning	8 to 5	193	193	0	0	-
Validation	-1	Preconditioning	4 to 1	193	193	0	0	-
Validation	0	Passage	1 to 4	151	151	0	0	-
Validation	0	Passage	5 to 8	151	151	0	0	-
Validation	1	RPE differentiation	1 to 4	335	335	0	0	-
Validation	1	RPE differentiation	5 to 8	335	335	0	0	-
Validation	2	RPE differentiation	8 to 5	335	335	0	0	-
Validation	2	RPE differentiation	4 to 1	335	335	0	0	-
Validation	3	RPE differentiation	1 to 4	335	335	0	0	-
Validation	3	RPE differentiation	5 to 8	335	335	0	0	-
Validation	4	RPE differentiation	8 to 5	335	335	0	0	-
Validation	4	RPE differentiation	4 to 1	335	335	0	0	-
Validation	5	RPE differentiation	1 to 4	335	335	0	0	-
Validation	5	RPE differentiation	5 to 8	335	335	0	0	-
Validation	6	RPE differentiation	8 to 5	335	335	0	0	-
Validation	6	RPE differentiation	4 to 1	335	335	0	0	-
Validation	7	RPE differentiation	1 to 4	335	335	0	0	-
Validation	7	RPE differentiation	5 to 8	335	335	0	0	-
Validation	8	RPE differentiation	8 to 5	335	335	0	0	-
Validation	8	RPE differentiation	4 to 1	335	335	0	0	-
Validation	9	RPE differentiation	1 to 4	335	335	0	0	-
Validation	9	RPE differentiation	5 to 8	335	335	0	0	-
Validation	10	RPE differentiation	8 to 5	335	335	0	0	-
Validation	10	RPE differentiation	4 to 1	335	335	0	0	-
Validation	11	RPE differentiation	1 to 4	335	335	0	0	-
Validation	11	RPE differentiation	5 to 8	335	335	0	0	-
Validation	12	RPE differentiation	8 to 5	335	335	0	0	-
Validation	12	RPE differentiation	4 to 1	335	335	0	0	-
Validation	13	RPE differentiation	1 to 4	335	335	0	0	-
Validation	13	RPE differentiation	5 to 8	335	335	0	0	-
Validation	14	RPE differentiation	8 to 5	335	335	0	0	-
Validation	14	RPE differentiation	4 to 1	335	335	0	0	-
Validation	15	RPE differentiation	1 to 4	335	334	1	0	Defective labware error
Validation	15	RPE differentiation	5 to 8	335	335	0	0	-
Validation	16	RPE differentiation	8 to 5	335	335	0	0	-
Validation	16	RPE differentiation	4 to 1	335	335	0	0	-
Validation	17	RPE differentiation	1 to 4	335	335	0	0	-
Validation	17	RPE differentiation	5 to 8	335	335	0	0	-
Validation	18	RPE differentiation	8 to 5	335	335	0	0	-
Validation	18	RPE differentiation	4 to 1	335	335	0	0	-
Validation	19	RPE differentiation	1 to 4	335	335	0	0	-
Validation	19	RPE differentiation	5 to 8	335	335	0	0	-
Validation	20	RPE differentiation	8 to 5	77	77	0	0	-
Validation	20	RPE differentiation	4 to 1	77	77	0	0	-
Validation	21	RPE differentiation	1 to 4	77	77	0	0	-
Validation	21	RPE differentiation	5 to 8	77	77	0	0	-
Validation	22	RPE differentiation	8 to 5	77	77	0	0	-
Validation	22	RPE differentiation	4 to 1	77	77	0	0	-
Validation	23	RPE differentiation	1 to 4	77	77	0	0	-
Validation	23	RPE differentiation	5 to 8	77	77	0	0	-
Validation	24	RPE differentiation	8 to 5	77	77	0	0	-
Validation	24	RPE differentiation	4 to 1	77	77	0	0	-
Validation	25	RPE differentiation	1 to 4	77	76	1	0	Microscope error
Validation	25	RPE differentiation	5 to 8	77	77	0	0	-
Validation	26	RPE maintenance	8 to 5	77	77	0	0	-
Validation	26	RPE maintenance	4 to 1	77	77	0	0	-
Validation	28	RPE maintenance	1 to 4	77	77	0	0	-
Validation	28	RPE maintenance	5 to 8	77	77	0	0	-
Validation	30	RPE maintenance	8 to 5	77	77	0	0	-
Validation	30	RPE maintenance	4 to 1	77	77	0	0	-
Validation	32	RPE maintenance	1 to 4	77	77	0	0	-
Validation	32	RPE maintenance	5 to 8	77	77	0	0	-
	0	0	00:00:00	00:00:00	00:00:00	0		0
	0	0	00:00:00	00:00:00	00:00:00	0		0
	0	0	00:00:00	00:00:00	00:00:00	0		0
	0	0	00:00:00	00:00:00	00:00:00	0		0
	0	0	00:00:00	00:00:00	00:00:00	0		0
	0	0	00:00:00	00:00:00	00:00:00	0		0
	0	0	00:00:00	00:00:00	00:00:00	0		0
	0	0	00:00:00	00:00:00	00:00:00	0		0

## Sheet: R4
DDay	Category	Plate	Job Name	Start Time	Finish Time	Duration	チェック用	Error raw	Error 抽象化	エラーコマンド番号
-7	Seeding	4 to 1, 8 to 5	RPE細胞播種X8_20190207	2019-02-07 12:22:29	2019-02-07 14:10:28	1:47:59		Date/Time:2019/02/07 12:09:12, Message:Major alarm occurred., Protocol:6Well×4 搬入 Main#1_Co2-inc#13, Major alarm:8000[0]:R1 HAND ERROR 4, Minor alarm:L1175:ﾛﾎﾞｯﾄにｱﾗｰﾑ(軽故障)が発生しました
-6	Preconditioning	1 to 4	R4_190208AM_RPE細胞培地交換X8_A-1	2019-02-08 15:17:04	2019-02-08 17:48:33	2:31:29
-6	Preconditioning	5 to 8	R4_190208PM_RPE細胞培地交換X8_A-2	2019-02-08 18:02:44	2019-02-08 20:33:09	2:30:25
-5	Preconditioning	8 to 5	R4_190209AM_RPE細胞培地交換X8_B-1	2019-02-09 09:00:28	2019-02-09 11:30:37	2:30:09
-5	Preconditioning	4 to 1	R4_190209PM_RPE細胞培地交換X8_B-2	2019-02-09 11:40:26	2019-02-09 14:10:44	2:30:18
-4	Preconditioning	1 to 4	R4_190210AM_RPE細胞培地交換X8_A-1	2019-02-10 10:42:05	2019-02-10 13:35:55	2:53:50		Date/Time:2019/02/10 12:43:17, Message:Major alarm occurred., Protocol:R4_190210AM_RPE細胞培地交換X8_A-1, Major alarm:8001[0]: Please Check Scope, Minor alarm:L1175:ﾛﾎﾞｯﾄにｱﾗｰﾑ(軽故障)が発生しました	Microscope error	#73
-4	Preconditioning	5 to 8	R4_190210PM_RPE細胞培地交換X8_A-2	2019-02-10 13:48:43	2019-02-10 16:19:28	2:30:45
-3	Preconditioning	8 to 5	R4_190211AM_RPE細胞培地交換X8_B-1	2019-02-11 11:33:11	2019-02-11 14:04:12	2:31:01
-3	Preconditioning	4 to 1	R4_190211PM_RPE細胞培地交換X8_B-2	2019-02-11 15:50:22	2019-02-11 18:21:34	2:31:12
-2	Preconditioning	1 to 4	R4_190212AM_RPE細胞培地交換X8_A-1	2019-02-12 10:40:20	2019-02-12 13:10:57	2:30:37
-2	Preconditioning	5 to 8	R4_190212PM_RPE細胞培地交換X8_A-2	2019-02-12 13:23:49	2019-02-12 15:54:23	2:30:34
-1	Preconditioning	8 to 5	R4_190213AM_RPE細胞培地交換X8_B-1	2019-02-13 11:06:08	2019-02-13 13:36:06	2:29:58
-1	Preconditioning	4 to 1	R4_190213PM_RPE細胞培地交換X8_B-2	2019-02-13 13:50:46	2019-02-13 16:20:19	2:29:33
0	Passage	1 to 4	R4_190214AM_d00	2019-02-14 10:15:55	2019-02-14 15:58:04	5:42:09
0	Passage	5 to 8	R4_190214PM_d00	2019-02-14 16:44:16	2019-02-14 22:27:46	5:43:30
1	RPE differentiation	1 to 4	R4_190215AM_RPE細胞培地交換X8_A-1	2019-02-15 12:29:03	2019-02-15 14:59:32	2:30:29
1	RPE differentiation	5 to 8	R4_190215PM_RPE細胞培地交換X8_A-2	2019-02-15 15:16:55	2019-02-15 17:47:38	2:30:43
2	RPE differentiation	8 to 5	R4_190216AM_RPE細胞培地交換X8_B-1	2019-02-16 10:57:01	2019-02-16 13:30:10	2:33:09
2	RPE differentiation	4 to 1	R4_190216PM_RPE細胞培地交換X8_B-2	2019-02-16 13:42:48	2019-02-16 16:12:18	2:29:30
3	RPE differentiation	1 to 4	R4_190217AM_RPE細胞培地交換X8_A-1	2019-02-17 10:43:56	2019-02-17 13:13:53	2:29:57
3	RPE differentiation	5 to 8	R4_190217PM_RPE細胞培地交換X8_A-2	2019-02-17 13:25:31	2019-02-17 15:58:21	2:32:50
4	RPE differentiation	8 to 5	R4_190218AM_RPE細胞培地交換X8_B-1	2019-02-18 10:23:48	2019-02-18 12:56:37	2:32:49
4	RPE differentiation	4 to 1	R4_190218PM_RPE細胞培地交換X8_B-2	2019-02-18 13:19:30	2019-02-18 15:49:05	2:29:35
5	RPE differentiation	1 to 4	R4_190219AM_RPE細胞培地交換X8_A-1	2019-02-19 10:52:50	2019-02-19 13:23:47	2:30:57
5	RPE differentiation	5 to 8	R4_190219PM_RPE細胞培地交換X8_A-2	2019-02-19 13:39:38	2019-02-19 16:11:43	2:32:05
6	RPE differentiation	8 to 5	R4_190220AM_RPE細胞培地交換X8_B-1	2019-02-20 10:47:01	2019-02-20 13:19:42	2:32:41
6	RPE differentiation	4 to 1	R4_190220PM_RPE細胞培地交換X8_B-2	2019-02-20 13:30:50	2019-02-20 16:00:53	2:30:03
7	RPE differentiation	1 to 4	R4_190221AM_RPE細胞培地交換X8_A-1	2019-02-21 11:51:43	2019-02-21 14:22:25	2:30:42
7	RPE differentiation	5 to 8	R4_190221PM_RPE細胞培地交換X8_A-2	2019-02-21 14:38:16	2019-02-21 17:18:05	2:39:49		automatic scan activation チェック見落とし （本番前）
8	RPE differentiation	8 to 5	R4_190222AM_RPE細胞培地交換X8_B-1	2019-02-22 10:51:39	2019-02-22 13:22:00	2:30:21
8	RPE differentiation	4 to 1	R4_190222PM_RPE細胞培地交換X8_B-2	2019-02-22 13:32:56	2019-02-22 16:02:55	2:29:59
9	RPE differentiation	1 to 4	R4_190223AM_RPE細胞培地交換X8_A-1	2019-02-23 11:51:10	2019-02-23 14:21:48	2:30:38
9	RPE differentiation	5 to 8	R4_190223PM_RPE細胞培地交換X8_A-2	2019-02-23 14:32:11	2019-02-23 17:05:01	2:32:50
10	RPE differentiation	8 to 5	R4_190224AM_RPE細胞培地交換X8_B-1	2019-02-24 11:14:25	2019-02-24 13:47:13	2:32:48
10	RPE differentiation	4 to 1	R4_190224PM_RPE細胞培地交換X8_B-2	2019-02-24 13:58:19	2019-02-24 16:28:38	2:30:19
11	RPE differentiation	1 to 4	R4_190225AM_RPE細胞培地交換X8_A-1	2019-02-25 10:25:02	2019-02-25 12:55:03	2:30:01
11	RPE differentiation	5 to 8	R4_190225PM_RPE細胞培地交換X8_A-2	2019-02-25 13:06:49	2019-02-25 15:38:24	2:31:35
12	RPE differentiation	8 to 5	R4_190226AM_RPE細胞培地交換X8_B-1	2019-02-26 10:27:07	2019-02-26 12:59:19	2:32:12
12	RPE differentiation	4 to 1	R4_190226PM_RPE細胞培地交換X8_B-2	2019-02-26 13:11:17	2019-02-26 15:42:55	2:31:38
13	RPE differentiation	1 to 4	R4_190227AM_RPE細胞培地交換X8_A-1	2019-02-27 10:38:13	2019-02-27 13:32:25	2:54:12		Date/Time:2019/02/27 12:39:18, Message:Major alarm occurred., Protocol:R4_190227AM_RPE細胞培地交換X8_A-1, Major alarm:8001[0]: Please Check Scope, Minor alarm:L1175:ﾛﾎﾞｯﾄにｱﾗｰﾑ(軽故障)が発生しました	Microscope error	#73
13	RPE differentiation	5 to 8	R4_190227PM_RPE細胞培地交換X8_A-2	2019-02-27 13:46:37	2019-02-27 16:23:20	2:36:43		Date/Time:2019/02/27 14:42:23, Message:Minor alarm occurred., Protocol:R4_190227PM_RPE細胞培地交換X8_A-2, Minor alarm:L1329:ﾋﾟﾍﾟｯﾄﾁｯﾌﾟ取り外し失敗	Micropipet tip ejection error	#36
14	RPE differentiation	8 to 5	R4_190228AM_RPE細胞培地交換X8_B-1	2019-02-28 10:33:47	2019-02-28 13:07:34	2:33:47		Date/Time:2019/02/28 12:44:42, Message:Minor alarm occurred., Protocol:R4_190228AM_RPE細胞培地交換X8_B-1, Minor alarm:L1329:ﾋﾟﾍﾟｯﾄﾁｯﾌﾟ取り外し失敗 （計2回発生）	Micropipet tip ejection error (x2)	#91, #97
14	RPE differentiation	4 to 1	R4_190228PM_RPE細胞培地交換X8_B-2	2019-02-28 13:21:42	2019-02-28 15:57:03	2:35:21		Date/Time:2019/02/28 13:42:32, Message:Minor alarm occurred., Protocol:R4_190228PM_RPE細胞培地交換X8_B-2, Minor alarm:L1329:ﾋﾟﾍﾟｯﾄﾁｯﾌﾟ取り外し失敗（計3回発生）	Micropipet tip ejection error (x3)	#6, #12, #14
15	RPE differentiation	1 to 4	R4_190301AM_RPE細胞培地交換X8_A-1	2019-03-01 11:11:44	2019-03-01 13:42:16	2:30:32		3/1よりCapclick実装（インストールは2/28作業終了後）
15	RPE differentiation	5 to 8	R4_190301PM_RPE細胞培地交換X8_A-2	2019-03-01 13:53:04	2019-03-01 16:25:28	2:32:24
16	RPE differentiation	8 to 5	R4_190302AM_RPE細胞培地交換X8_B-1	2019-03-02 11:57:01	2019-03-02 14:27:19	2:30:18
16	RPE differentiation	4 to 1	R4_190302PM_RPE細胞培地交換X8_B-2	2019-03-02 14:38:14	2019-03-02 17:07:53	2:29:39
17	RPE differentiation	1 to 4	R4_190303AM_RPE細胞培地交換X8_A-1	2019-03-03 10:37:33	2019-03-03 13:26:30	2:48:57		Date/Time:2019/03/03 12:38:18, Message:Major alarm occurred., Protocol:R4_190303AM_RPE細胞培地交換X8_A-1, Major alarm:8001[0]: Please Check Scope, Minor alarm:L1175:ﾛﾎﾞｯﾄにｱﾗｰﾑ(軽故障)が発生しました（別ウインドウ開いていたため）	Human error	#73
17	RPE differentiation	5 to 8	R4_190303PM_RPE細胞培地交換X8_A-2	2019-03-03 13:49:29	2019-03-03 16:22:08	2:32:39
18	RPE differentiation	8 to 5	R4_190304AM_RPE細胞培地交換X8_B-1	2019-03-04 09:00:02	2019-03-04 11:31:58	2:31:56		AM終了後にエラー表示、BioPortalフリーズ。FA-PC再起動でPM実行。
18	RPE differentiation	4 to 1	R4_190304PM_RPE細胞培地交換X8_B-2	2019-03-04 12:12:20	2019-03-04 14:45:17	2:32:57
19	RPE differentiation	1 to 4	R4_190305AM_RPE細胞培地交換X8_A-1	2019-03-05 10:40:30	2019-03-05 13:10:05	2:29:35
19	RPE differentiation	5 to 8	R4_190305PM_RPE細胞培地交換X8_A-2	2019-03-05 13:23:54	2019-03-05 15:55:27	2:31:33
20	RPE differentiation	8 to 5	R4_190306AM	2019-03-06 10:25:10	2019-03-06 12:13:36	1:48:26
20	RPE differentiation	4 to 1	R4_190306PM	2019-03-06 12:20:49	2019-03-06 15:16:26	2:55:37		Date/Time:2019/03/06 13:50:15, Message:Major alarm occurred., Protocol:R4_190306PM, Major alarm:8001[0]: Please Check Scope, Minor alarm:L1175:ﾛﾎﾞｯﾄにｱﾗｰﾑ(軽故障)が発生しました（EVOS-PC HDD書き込み速度異常）	HDD for microscope PC error	#55
21	RPE differentiation	1 to 4	R4_190307AM	2019-03-07 11:17:57	2019-03-07 13:04:43	1:46:46
21	RPE differentiation	5 to 8	R4_190307PM	2019-03-07 13:07:17	2019-03-07 14:55:11	1:47:54
22	RPE differentiation	8 to 5	R4_190308AM	2019-03-08 10:22:27	2019-03-08 12:10:50	1:48:23
22	RPE differentiation	4 to 1	R4_190308PM	2019-03-08 12:15:10	2019-03-08 14:02:38	1:47:28
23	RPE differentiation	1 to 4	R4_190309AM	2019-03-09 10:25:05	2019-03-09 12:12:25	1:47:20
23	RPE differentiation	5 to 8	R4_190309PM	2019-03-09 12:15:54	2019-03-09 14:04:59	1:49:05
24	RPE differentiation	8 to 5	R4_190310AM	2019-03-10 10:38:53	2019-03-10 12:27:04	1:48:11
24	RPE differentiation	4 to 1	R4_190310PM	2019-03-10 12:32:18	2019-03-10 14:19:17	1:46:59
25	RPE differentiation	1 to 4	R4_190311AM	2019-03-11 10:16:04	2019-03-11 12:04:50	1:48:46
25	RPE differentiation	5 to 8	R4_190311PM	2019-03-11 12:07:34	2019-03-11 13:55:20	1:47:46
26	RPE maintenance	8 to 5	R4_190312AM	2019-03-12 10:52:50	2019-03-12 12:40:53	1:48:03
26	RPE maintenance	4 to 1	R4_190312PM	2019-03-12 12:43:34	2019-03-12 14:32:14	1:48:40
28	RPE maintenance	1 to 4	R4_190314AM	2019-03-14 10:28:18	2019-03-14 12:17:38	1:49:20
28	RPE maintenance	5 to 8	R4_190314PM	2019-03-14 12:20:12	2019-03-14 14:11:09	1:50:57
30	RPE maintenance	8 to 5	R4_190316AM	2019-03-16 10:23:16	2019-03-16 12:12:15	1:48:59
30	RPE maintenance	4 to 1	R4_190316PM	2019-03-16 12:14:59	2019-03-16 14:06:20	1:51:21		Date/Time:2019/03/16 12:30:43, Message:Minor alarm occurred., Protocol:R4_190316PM, Minor alarm:L1329:ﾋﾟﾍﾟｯﾄﾁｯﾌﾟ取り外し失敗	Micropipet tip ejection error	#16
32	RPE maintenance	1 to 4	R4_190318AM	2019-03-18 11:30:01	2019-03-18 13:16:22	1:46:21
32	RPE maintenance	5 to 8	R4_190318PM	2019-03-18 13:18:52	2019-03-18 15:06:29	1:47:37
							7 days, 9:45:41

## Sheet: R5
DDay	Category	Plate	Job Name	Start Time	Finish Time	Duration	チェック用	Error raw	Error 抽象化	エラーコマンド番号
-7	Seeding	4 to 1, 8 to 5	R5_190418_d-7	2019-04-18 12:39:42	2019-04-18 14:27:46	1:48:04
-6	Preconditioning	1 to 4	R5_190419AM_d-6	2019-04-19 13:05:56	2019-04-19 15:36:58	2:31:02
-6	Preconditioning	5 to 8	R5_190419PM_d-6	2019-04-19 15:47:38	2019-04-19 18:06:44	2:19:06
-5	Preconditioning	8 to 5	R5_190420AM_d-5	2019-04-20 11:18:42	2019-04-20 13:48:48	2:30:06
-5	Preconditioning	4 to 1	R5_190420PM_d-5	2019-04-20 14:16:38	2019-04-20 16:59:46	2:43:08		Date/Time:2019/04/20 16:33:05, Message:Major alarm occurred., Protocol:R5_190420PM_d-5, Major alarm:4315[4]:衝突検出, Minor alarm:L1175:ﾛﾎﾞｯﾄにｱﾗｰﾑ(軽故障)が発生しました（5mLチップ取り付け時）	Micropipet tip loading error	#184
-4	Preconditioning	1 to 4	R5_190421AM_d-4	2019-04-21 10:43:17	2019-04-21 13:23:02	2:39:45
-4	Preconditioning	5 to 8	R5_190421PM_d-4	2019-04-21 13:35:04	2019-04-21 16:09:11	2:34:07
-3	Preconditioning	8 to 5	R5_190422AM_d-3	2019-04-22 10:40:37	2019-04-22 13:19:21	2:38:44
-3	Preconditioning	4 to 1	R5_190422PM_d-3	2019-04-22 13:32:35	2019-04-22 16:18:44	2:46:09
-2	Preconditioning	1 to 4	R5_190423AM_d-2	2019-04-23 10:53:46	2019-04-23 13:43:26	2:49:40
-2	Preconditioning	5 to 8	R5_190423PM_d-2	2019-04-23 13:56:40	2019-04-23 16:42:29	2:45:49		チップ取り付け時に5mLチップボックス持ち上がる事象発生
-1	Preconditioning	8 to 5	R5_190424AM_d-1	2019-04-24 10:55:04	2019-04-24 13:46:14	2:51:10
-1	Preconditioning	4 to 1	R5_190424PM_d-1	2019-04-24 13:59:33	2019-04-24 16:46:11	2:46:38		チップ取り付け時に5mLチップボックス持ち上がる事象発生
0	Passage	1 to 4	R5_190425AM_d00	2019-04-25 10:00:39	2019-04-25 15:44:39	5:44:00
0	Passage	5 to 8	R5_190425PM_d00	2019-04-25 16:31:28	2019-04-25 22:14:27	5:42:59
1	RPE differentiation	1 to 4	R5_190426AM_d01	2019-04-26 11:03:13	2019-04-26 14:53:11	3:49:58
1	RPE differentiation	5 to 8	R5_190426PM_d01	2019-04-26 15:14:08	2019-04-26 19:09:21	3:55:13		隣接チップ引き上げ; 1mLチップ
2	RPE differentiation	8 to 5	R5_190427AM_d02	2019-04-27 10:45:19	2019-04-27 14:38:28	3:53:09
2	RPE differentiation	4 to 1	R5_190427PM_d02	2019-04-27 14:56:29	2019-04-27 18:44:53	3:48:24
3	RPE differentiation	1 to 4	R5_190428AM_d03	2019-04-28 11:06:14	2019-04-28 14:51:31	3:45:17
3	RPE differentiation	5 to 8	R5_190428PM_d03	2019-04-28 15:11:37	2019-04-28 19:00:29	3:48:52
4	RPE differentiation	8 to 5	R5_190429AM_d04	2019-04-29 10:35:44	2019-04-29 14:19:20	3:43:36
4	RPE differentiation	4 to 1	R5_190429PM_d04	2019-04-29 14:34:45	2019-04-29 18:21:40	3:46:55		Date/Time:2019/04/29 16:34:26, Message:Minor alarm occurred., Protocol:R5_190429PM_d04, Minor alarm:L1328:ﾋﾟﾍﾟｯﾄﾁｯﾌﾟ装着失敗（1mLチップ; 300µL設定ピペット）	Micropipet tip loading error	#185
5	RPE differentiation	1 to 4	R5_190430AM_d05	2019-04-30 10:23:46	2019-04-30 14:00:16	3:36:30
5	RPE differentiation	5 to 8	R5_190430PM_d05	2019-04-30 14:22:26	2019-04-30 17:58:38	3:36:12		Date/Time:2019/04/30 16:14:39, Message:Minor alarm occurred., Protocol:R5_190430PM_d05, Minor alarm:L1328:ﾋﾟﾍﾟｯﾄﾁｯﾌﾟ装着失敗（1mLチップ; 300µL設定ピペット）	Micropipet tip loading error	#181
6	RPE differentiation	8 to 5	R5_190501AM_d06	2019-05-01 10:20:57	2019-05-01 13:51:48	3:30:51
6	RPE differentiation	4 to 1	R5_190501PM_d06	2019-05-01 14:07:19	2019-05-01 17:44:17	3:36:58
7	RPE differentiation	1 to 4	R5_190502AM_d07	2019-05-02 11:49:40	2019-05-02 15:23:40	3:34:00
7	RPE differentiation	5 to 8	R5_190502PM_d07	2019-05-02 15:38:03	2019-05-02 19:46:03	4:08:00		Date/Time:2019/05/02 18:25:25, Message:Major alarm occurred., Protocol:R5_190502PM_d07, Major alarm:8001[0]: Please Check Scope, Minor alarm:L1175:ﾛﾎﾞｯﾄにｱﾗｰﾑ(軽故障)が発生しました（EVOS-PC HDD書き込み速度異常）	Microscope error	#248
8	RPE differentiation	8 to 5	R5_190503AM_d08	2019-05-03 11:10:58	2019-05-03 14:36:35	3:25:37
8	RPE differentiation	4 to 1	R5_190503PM_d08	2019-05-03 14:56:27	2019-05-03 18:24:53	3:28:26
9	RPE differentiation	1 to 4	R5_190504AM_d09	2019-05-04 12:27:22	2019-05-04 15:52:27	3:25:05		AM Job欠失
9	RPE differentiation	5 to 8	R5_190504PM_d09	2019-05-04 16:06:13	2019-05-04 19:26:36	3:20:23		Date/Time:2019/05/04 15:04:32, Message:Minor alarm occurred., Protocol:R5_190504AM_d09, Minor alarm:L1328:ﾋﾟﾍﾟｯﾄﾁｯﾌﾟ装着失敗（1mLチップ; 300µL設定ピペット）	Micropipet tip loading error	#267
10	RPE differentiation	8 to 5	R5_190505AM_d10	2019-05-05 11:22:46	2019-05-05 14:39:21	3:16:35
10	RPE differentiation	4 to 1	R5_190505PM_d10	2019-05-05 14:53:39	2019-05-05 18:13:57	3:20:18
11	RPE differentiation	1 to 4	R5_190506AM_d11	2019-05-06 11:03:43	2019-05-06 14:18:02	3:14:19
11	RPE differentiation	5 to 8	R5_190506PM_d11	2019-05-06 14:34:48	2019-05-06 17:48:26	3:13:38
12	RPE differentiation	8 to 5	R5_190507AM_d12	2019-05-07 10:46:31	2019-05-07 13:54:26	3:07:55
12	RPE differentiation	4 to 1	R5_190507PM_d12	2019-05-07 14:16:57	2019-05-07 17:22:22	3:05:25
13	RPE differentiation	1 to 4	R5_190508AM_d13	2019-05-08 11:09:22	2019-05-08 14:10:08	3:00:46
13	RPE differentiation	5 to 8	R5_190508PM_d13	2019-05-08 14:23:51	2019-05-08 17:28:12	3:04:21		隣接チップ引き上げ; 200µLチップ
14	RPE differentiation	8 to 5	R5_190509AM_d14	2019-05-09 11:00:10	2019-05-09 13:58:53	2:58:43
14	RPE differentiation	4 to 1	R5_190509PM_d14	2019-05-09 14:12:53	2019-05-09 17:10:04	2:57:11
15	RPE differentiation	1 to 4	R5_190510AM_d15	2019-05-10 11:28:45	2019-05-10 14:23:09	2:54:24
15	RPE differentiation	5 to 8	R5_190510PM_d15	2019-05-10 14:40:10	2019-05-10 17:35:10	2:55:00
16	RPE differentiation	8 to 5	R5_190511AM_d16	2019-05-11 11:09:12	2019-05-11 14:02:03	2:52:51
16	RPE differentiation	4 to 1	R5_190511PM_d16	2019-05-11 14:14:49	2019-05-11 17:04:09	2:49:20
17	RPE differentiation	1 to 4	R5_190512AM_d17	2019-05-12 11:17:24	2019-05-12 14:00:06	2:42:42
17	RPE differentiation	5 to 8	R5_190512PM_d17	2019-05-12 14:14:23	2019-05-12 17:02:58	2:48:35
18	RPE differentiation	8 to 5	R5_190513AM_d18	2019-05-13 11:14:38	2019-05-13 13:54:07	2:39:29
18	RPE differentiation	4 to 1	R5_190513PM_d18	2019-05-13 14:08:24	2019-05-13 16:51:46	2:43:22
19	RPE differentiation	1 to 4	R5_190514AM_d19	2019-05-14 10:47:52	2019-05-14 13:28:10	2:40:18
19	RPE differentiation	5 to 8	R5_190514PM_d19	2019-05-14 13:39:32	2019-05-14 16:17:52	2:38:20		隣接チップ引き上げ; 1mLチップ
20	RPE differentiation	8 to 5	R5_190515AM_d20	2019-05-15 10:41:33	2019-05-15 12:49:04	2:07:31		Date/Time:2019/05/15 11:44:35, Message:Major alarm occurred., Protocol:R5_190515AM_d20, Major alarm:8001[0]: Please Check Scope, Minor alarm:L1175:ﾛﾎﾞｯﾄにｱﾗｰﾑ(軽故障)が発生しました（Capclick動作不良）	Microscope error	#36
20	RPE differentiation	4 to 1	R5_190515PM_d20	2019-05-15 12:52:38	2019-05-15 14:40:33	1:47:55
21	RPE differentiation	1 to 4	R5_190516AM_d21	2019-05-16 10:49:00	2019-05-16 12:37:02	1:48:02
21	RPE differentiation	5 to 8	R5_190516PM_d21	2019-05-16 12:39:44	2019-05-16 14:27:38	1:47:54
22	RPE differentiation	8 to 5	R5_190517AM_d22	2019-05-17 10:36:09	2019-05-17 12:24:33	1:48:24
22	RPE differentiation	4 to 1	R5_190517PM_d22	2019-05-17 12:32:36	2019-05-17 14:21:25	1:48:49
23	RPE differentiation	1 to 4	R5_190518AM_d23	2019-05-18 11:45:26	2019-05-18 13:33:01	1:47:35
23	RPE differentiation	5 to 8	R5_190518PM_d23	2019-05-18 13:57:57	2019-05-18 15:46:24	1:48:27
24	RPE differentiation	8 to 5	R5_190519AM_d24	2019-05-19 12:10:03	2019-05-19 13:57:52	1:47:49
24	RPE differentiation	4 to 1	R5_190519PM_d24	2019-05-19 14:09:03	2019-05-19 15:57:58	1:48:55
25	RPE differentiation	1 to 4	R5_190520AM_d25	2019-05-20 10:23:49	2019-05-20 13:22:28	2:58:39		●自動生成データおかしいので要確認 EVOS-PC HDDの書き込み速度異常が発生。4枚目だったためabortで処理（13:22:28）。培養室に退避していた細胞plateは、新規に搬入Jobを生成しセル内CO2incへ格納（13:33:52格納完了←終了時刻に修正） 13:45:11はPM分1回目の開始時刻だったため修正。 Date/Time:2019/05/20 12:21:06, Message:Major alarm occurred., Protocol:R5_190520AM_d25, Major alarm:8001[0]: Please Check Scope, Minor alarm:L1175:ﾛﾎﾞｯﾄにｱﾗｰﾑ(軽故障)が発生しました	HDD for microscope PC error	#74 (75-77 abort)
25	RPE differentiation	5 to 8	R5_190520PM_d25	2019-05-20 14:33:42	2019-05-20 16:06:50	1:33:08		●自動生成データおかしいので要確認 EVOS-PC HDDの書き込み速度異常が発生。1枚目だったためabortで処理（14:33:42）。細胞plateは、培養室に退避した。 ダミーのプレートとチューブを用意してPM2回目を実行（14:44:18開始）し、EVOSはマニュアルでStop/Discardで処理し、16:06:50に終了。 翌日より保存先をCドライブにして実行した	HDD for microscope PC error	#17
26	RPE maintenance	8 to 5	R5_190521AM_d26	2019-05-21 10:43:02	2019-05-21 12:30:52	1:47:50
26	RPE maintenance	4 to 1	R5_190521PM_d26	2019-05-21 12:35:08	2019-05-21 14:23:15	1:48:07
28	RPE maintenance	1 to 4	R5_190523AM_d28	2019-05-23 10:27:32	2019-05-23 12:15:19	1:47:47
28	RPE maintenance	5 to 8	R5_190523PM_d28	2019-05-23 12:20:06	2019-05-23 14:02:00	1:41:54		EVOS撮像skip事象
30	RPE maintenance	8 to 5	R5_190525AM_d30	2019-05-25 11:19:43	2019-05-25 13:07:38	1:47:55
30	RPE maintenance	4 to 1	R5_190525PM_d30	2019-05-25 13:20:54	2019-05-25 15:08:39	1:47:45
32	RPE maintenance	1 to 4	R5_190527AM_d32	2019-05-27 11:20:59	2019-05-27 13:08:24	1:47:25
32	RPE maintenance	5 to 8	R5_190527PM_d32	2019-05-27 13:11:12	2019-05-27 14:58:17	1:47:05
							8 days, 15:36:21

## Sheet: R7
DDay	Category	Plate	Job Name	Start Time	Finish Time	Duration	チェック用	Error raw	Error 抽象化	エラーコマンド番号
-7	Seeding	4 to 1, 8 to 5	R7_190705_d-7	2019-07-05 12:13:58	2019-07-05 14:02:26	1:48:28
-6	Preconditioning	1 to 4	R7_190706AM_d-6	2019-07-06 12:37:47	2019-07-06 15:29:57	2:52:10
-6	Preconditioning	5 to 8	R7_190706PM_d-6	2019-07-06 15:42:20	2019-07-06 18:34:12	2:51:52
-5	Preconditioning	8 to 5	R7_190707AM_d-5	2019-07-07 11:59:55	2019-07-07 14:52:32	2:52:37
-5	Preconditioning	4 to 1	R7_190707PM_d-5	2019-07-07 15:06:29	2019-07-07 18:06:35	3:00:06
-4	Preconditioning	1 to 4	R7_190708AM_d-4	2019-07-08 10:50:01	2019-07-08 14:02:48	3:12:47		EVOS AF不良
-4	Preconditioning	5 to 8	R7_190708PM_d-4	2019-07-08 14:16:30	2019-07-08 17:10:29	2:53:59
-3	Preconditioning	8 to 5	R7_190709AM_d-3	2019-07-09 10:51:04	2019-07-09 13:47:44	2:56:40
-3	Preconditioning	4 to 1	R7_190709PM_d-3	2019-07-09 14:01:09	2019-07-09 17:47:02	3:45:53		Date/Time:2019/07/09 15:47:33, Message:Major alarm occurred., Mode:standard, Protocol:R7_190709PM_d-3, Major alarm:8001[0]: Please Check Scope, Minor alarm:L1175:ﾛﾎﾞｯﾄにｱﾗｰﾑ(軽故障)が発生しました, Command Name:GETIMAGE_MP6, (X,Y): (7,92) （EVOS AF不良; 2plateで発生）	Microscope error	#92
-2	Preconditioning	1 to 4	R7_190710AM_d-2	2019-07-10 10:45:28	2019-07-10 14:22:52	3:37:24		Date/Time:2019/07/10 11:37:08, Message: Major alarm occurred., Mode:standard, Protocol:R7_190710AM_d-2, Major alarm:8001[0]: Please Check Scope, Minor alarm:L1175:ﾛﾎﾞｯﾄにｱﾗｰﾑ(軽故障)が発生しました, Command Name:GETIMAGE_MP6, (X,Y):(4,45) （EVOS AF不良）	Microscope error	#45
-2	Preconditioning	5 to 8	R7_190710PM_d-2	2019-07-10 14:35:27	2019-07-10 17:34:50	2:59:23
-1	Preconditioning	8 to 5	R7_190711AM_d-1	2019-07-11 11:11:05	2019-07-11 14:05:03	2:53:58
-1	Preconditioning	4 to 1	R7_190711PM_d-1	2019-07-11 14:19:25	2019-07-11 17:50:07	3:30:42		EVOS AF不良wellはマニュアルでスキップ
0	Passage	1 to 4	R7_190712AM_d00	2019-07-12 09:52:09	2019-07-12 15:32:04	5:39:55
0	Passage	5 to 8	R7_190712PM_d00	2019-07-12 16:21:53	2019-07-12 22:01:45	5:39:52
1	RPE differentiation	1 to 4	R7_190713AM_d01	2019-07-13 11:39:30	2019-07-13 15:34:40	3:55:10
1	RPE differentiation	5 to 8	R7_190713PM_d01	2019-07-13 15:51:55	2019-07-13 19:39:46	3:47:51
2	RPE differentiation	8 to 5	R7_190714AM_d02	2019-07-14 11:42:19	2019-07-14 15:29:58	3:47:39
2	RPE differentiation	4 to 1	R7_190714PM_d02	2019-07-14 15:46:01	2019-07-14 19:39:59	3:53:58
3	RPE differentiation	1 to 4	R7_190715AM_d03	2019-07-15 11:58:25	2019-07-15 15:48:11	3:49:46
3	RPE differentiation	5 to 8	R7_190715PM_d03	2019-07-15 16:23:15	2019-07-15 20:07:39	3:44:24
4	RPE differentiation	8 to 5	R7_190716AM_d04	2019-07-16 11:48:14	2019-07-16 15:25:54	3:37:40
4	RPE differentiation	4 to 1	R7_190716PM_d04	2019-07-16 15:44:54	2019-07-16 19:38:34	3:53:40
5	RPE differentiation	1 to 4	R7_190717AM_d05	2019-07-17 12:02:00	2019-07-17 15:41:33	3:39:33
5	RPE differentiation	5 to 8	R7_190717PM_d05	2019-07-17 15:59:59	2019-07-17 19:33:51	3:33:52
6	RPE differentiation	8 to 5	R7_190718AM_d06	2019-07-18 11:14:42	2019-07-18 14:42:16	3:27:34
6	RPE differentiation	4 to 1	R7_190718PM_d06	2019-07-18 15:11:44	2019-07-18 18:51:06	3:39:22
7	RPE differentiation	1 to 4	R7_190719AM_d07	2019-07-19 11:13:50	2019-07-19 14:56:27	3:42:37
7	RPE differentiation	5 to 8	R7_190719PM_d07	2019-07-19 15:16:34	2019-07-19 18:43:52	3:27:18
8	RPE differentiation	8 to 5	R7_190720AM_d08	2019-07-20 11:29:35	2019-07-20 14:57:45	3:28:10
8	RPE differentiation	4 to 1	R7_190720PM_d08	2019-07-20 15:50:29	2019-07-20 19:23:04	3:32:35		L1440:R2ﾊﾝﾄﾞ到達時間異常(149)
9	RPE differentiation	1 to 4	R7_190721AM_d09	2019-07-21 11:29:51	2019-07-21 14:59:10	3:29:19
9	RPE differentiation	5 to 8	R7_190721PM_d09	2019-07-21 15:20:13	2019-07-21 18:41:38	3:21:25
10	RPE differentiation	8 to 5	R7_190722AM_d10	2019-07-22 11:23:57	2019-07-22 14:42:57	3:19:00
10	RPE differentiation	4 to 1	R7_190722PM_d10	2019-07-22 14:57:36	2019-07-22 18:29:12	3:31:36
11	RPE differentiation	1 to 4	R7_190723AM_d11	2019-07-23 11:06:03	2019-07-23 14:40:34	3:34:31		Date/Time:2019/07/23 11:24:29, Message:Minor alarm occurred., Mode:standard, Protocol:R7_190723AM_d11, Minor alarm:L1288:ﾋﾟﾍﾟｯﾄ取出し失敗, Command Name:TRANSFER_TU50_MP6, (X,Y):(3,59)（No.9;5µL設定が脱落していた）	Human error	#59
11	RPE differentiation	5 to 8	R7_190723PM_d11	2019-07-23 15:02:19	2019-07-23 18:13:29	3:11:10
12	RPE differentiation	8 to 5	R7_190724AM_d12	2019-07-24 11:08:29	2019-07-24 14:21:30	3:13:01
12	RPE differentiation	4 to 1	R7_190724PM_d12	2019-07-24 14:38:04	2019-07-24 17:56:27	3:18:23
13	RPE differentiation	1 to 4	R7_190725AM_d13	2019-07-25 11:50:41	2019-07-25 15:07:52	3:17:11
13	RPE differentiation	5 to 8	R7_190725PM_d13	2019-07-25 15:32:25	2019-07-25 18:39:43	3:07:18
14	RPE differentiation	8 to 5	R7_190726AM_d14	2019-07-26 11:04:57	2019-07-26 14:11:04	3:06:07
14	RPE differentiation	4 to 1	R7_190726PM_d14	2019-07-26 14:26:17	2019-07-26 17:38:10	3:11:53
15	RPE differentiation	1 to 4	R7_190727AM_d15	2019-07-27 11:13:59	2019-07-27 14:24:03	3:10:04
15	RPE differentiation	5 to 8	R7_190727PM_d15	2019-07-27 14:44:33	2019-07-27 17:49:16	3:04:43
16	RPE differentiation	8 to 5	R7_190728AM_d16	2019-07-28 11:06:32	2019-07-28 14:19:05	3:12:33		Date/Time:2019/07/28 13:52:06, Message:Minor alarm occurred., Mode:standard, Protocol:R7_190728AM_d16, Minor alarm:L1352:ｱｽﾋﾟﾚｰﾀﾁｯﾌﾟ装着失敗, Command Name:DISCARD_MP6, (X,Y):(15,326)（チップ不足）	Human error	#326
16	RPE differentiation	4 to 1	R7_190728PM_d16	2019-07-28 14:33:43	2019-07-28 17:37:40	3:03:57
17	RPE differentiation	1 to 4	R7_190729AM_d17	2019-07-29 13:00:38	2019-07-29 16:02:53	3:02:15
17	RPE differentiation	5 to 8	R7_190729PM_d17	2019-07-29 16:17:44	2019-07-29 19:12:41	2:54:57
18	RPE differentiation	8 to 5	R7_190730AM_d18	2019-07-30 11:15:06	2019-07-30 14:00:02	2:44:56
18	RPE differentiation	4 to 1	R7_190730PM_d18	2019-07-30 14:14:24	2019-07-30 17:12:07	2:57:43
19	RPE differentiation	1 to 4	R7_190731AM_d19	2019-07-31 11:08:58	2019-07-31 13:51:09	2:42:11
19	RPE differentiation	5 to 8	R7_190731PM_d19	2019-07-31 14:03:03	2019-07-31 16:44:12	2:41:09
20	RPE differentiation	8 to 5	R7_190801AM_d20	2019-08-01 11:15:57	2019-08-01 13:03:06	1:47:09
20	RPE differentiation	4 to 1	R7_190801PM_d20	2019-08-01 13:06:24	2019-08-01 14:54:13	1:47:49
21	RPE differentiation	1 to 4	R7_190802AM_d21	2019-08-02 11:14:00	2019-08-02 13:02:07	1:48:07
21	RPE differentiation	5 to 8	R7_190802PM_d21	2019-08-02 13:04:57	2019-08-02 14:53:15	1:48:18
22	RPE differentiation	8 to 5	R7_190803AM_d22	2019-08-03 12:14:11	2019-08-03 14:02:17	1:48:06
22	RPE differentiation	4 to 1	R7_190803PM_d22	2019-08-03 14:27:08	2019-08-03 16:15:12	1:48:04
23	RPE differentiation	1 to 4	R7_190804AM_d23	2019-08-04 11:19:55	2019-08-04 13:08:08	1:48:13
23	RPE differentiation	5 to 8	R7_190804PM_d23	2019-08-04 13:11:15	2019-08-04 14:59:14	1:47:59
24	RPE differentiation	8 to 5	R7_190805AM_d24	2019-08-05 11:15:04	2019-08-05 13:03:23	1:48:19
24	RPE differentiation	4 to 1	R7_190805PM_d24	2019-08-05 13:07:05	2019-08-05 14:55:22	1:48:17
25	RPE differentiation	1 to 4	R7_190806AM_d25	2019-08-06 11:10:12	2019-08-06 12:58:22	1:48:10
25	RPE differentiation	5 to 8	R7_190806PM_d25	2019-08-06 13:02:11	2019-08-06 14:50:27	1:48:16
26	RPE maintenance	8 to 5	R7_190807AM_d26	2019-08-07 11:17:07	2019-08-07 13:05:18	1:48:11
26	RPE maintenance	4 to 1	R7_190807PM_d26	2019-08-07 13:08:59	2019-08-07 14:56:37	1:47:38
28	RPE maintenance	1 to 4	R7_190809AM_d28	2019-08-09 11:07:57	2019-08-09 12:56:19	1:48:22
28	RPE maintenance	5 to 8	R7_190809PM_d28	2019-08-09 13:00:08	2019-08-09 14:48:23	1:48:15
30	RPE maintenance	8 to 5	R7_190811AM_d30	2019-08-11 11:36:18	2019-08-11 13:24:17	1:47:59
30	RPE maintenance	4 to 1	R7_190811PM_d30	2019-08-11 13:28:48	2019-08-11 15:16:20	1:47:32
32	RPE maintenance	1 to 4	R7_190813AM_d32	2019-08-13 11:01:08	2019-08-13 12:48:29	1:47:21
32	RPE maintenance	5 to 8	R7_190813PM_d32	2019-08-13 12:51:17	2019-08-13 14:39:31	1:48:14
							8 days, 22:52:36

## Sheet: R10
DDay	Category	Plate	Job Name	Start Time	Finish Time	Duration	チェック用	Error raw	Error 抽象化	エラーコマンド番号
-7	Seeding	4 to 1, 8 to 5	R10_200123_d-7	2020-01-23 12:14:11	2020-01-23 14:02:42	1:48:31
-6	Preconditioning	1 to 4	R10_200124AM_d-6	2020-01-24 12:17:19	2020-01-24 14:35:29	2:18:10
-6	Preconditioning	5 to 8	R10_200124PM_d-6	2020-01-24 14:51:09	2020-01-24 17:11:29	2:20:20
-5	Preconditioning	8 to 5	R10_200125AM_d-5	2020-01-25 10:30:07	2020-01-25 13:17:00	2:46:53
-5	Preconditioning	4 to 1	R10_200125PM_d-5	2020-01-25 13:30:34	2020-01-25 16:19:06	2:48:32
-4	Preconditioning	1 to 4	R10_200126AM_d-4	2020-01-26 12:26:20	2020-01-26 15:15:04	2:48:44
-4	Preconditioning	5 to 8	R10_200126PM_d-4	2020-01-26 15:42:40	2020-01-26 18:29:27	2:46:47
-3	Preconditioning	8 to 5	R10_200127AM_d-3	2020-01-27 11:20:00	2020-01-27 14:06:37	2:46:37
-3	Preconditioning	4 to 1	R10_200127PM_d-3	2020-01-27 14:36:26	2020-01-27 17:24:48	2:48:22
-2	Preconditioning	1 to 4	R10_200128AM_d-2	2020-01-28 10:47:01	2020-01-28 13:35:08	2:48:07
-2	Preconditioning	5 to 8	R10_200128PM_d-2	2020-01-28 13:52:28	2020-01-28 16:39:04	2:46:36
-1	Preconditioning	8 to 5	R10_200129AM_d-1	2020-01-29 10:34:00	2020-01-29 13:20:50	2:46:50
-1	Preconditioning	4 to 1	R10_200129PM_d-1	2020-01-29 13:38:20	2020-01-29 16:26:34	2:48:14
0	Passage	1 to 4	R10_200130AM_d00_skipEVOS	2020-01-30 10:12:02	2020-01-30 15:03:27	4:51:25
0	Passage	5 to 8	R10_200130PM_d00_skipEVOS	2020-01-30 16:08:40	2020-01-30 20:59:38	4:50:58
1	RPE differentiation	1 to 4	R10_200131AM_d1	2020-01-31 11:30:25	2020-01-31 15:16:44	3:46:19
1	RPE differentiation	5 to 8	R10_200131PM_d1	2020-01-31 15:45:29	2020-01-31 19:30:05	3:44:36
2	RPE differentiation	8 to 5	R10_200201AM_d2	2020-02-01 10:09:19	2020-02-01 13:52:04	3:42:45
2	RPE differentiation	4 to 1	R10_200201PM_d2	2020-02-01 14:11:49	2020-02-01 17:55:03	3:43:14
3	RPE differentiation	1 to 4	R10_200202AM_d3	2020-02-02 11:38:24	2020-02-02 15:20:01	3:41:37
3	RPE differentiation	5 to 8	R10_200202PM_d3	2020-02-02 16:01:22	2020-02-02 19:46:28	3:45:06
4	RPE differentiation	8 to 5	R10_200203AM_d4	2020-02-03 12:10:35	2020-02-03 15:53:17	3:42:42
4	RPE differentiation	4 to 1	R10_200203PM_d4	2020-02-03 16:12:03	2020-02-03 20:01:30	3:49:27
5	RPE differentiation	1 to 4	R10_200204AM_d5	2020-02-04 10:48:49	2020-02-04 14:32:21	3:43:32
5	RPE differentiation	5 to 8	R10_200204PM_d5	2020-02-04 14:51:07	2020-02-04 18:26:28	3:35:21
6	RPE differentiation	8 to 5	R10_200205AM_d6	2020-02-05 10:47:33	2020-02-05 14:15:17	3:27:44
6	RPE differentiation	4 to 1	R10_200205AM_d6	2020-02-05 15:02:00	2020-02-05 18:34:28	3:32:28
7	RPE differentiation	1 to 4	R10_200206AM_d7	2020-02-06 10:57:14	2020-02-06 14:34:23	3:37:09
7	RPE differentiation	5 to 8	R10_200206PM_d7	2020-02-06 14:50:40	2020-02-06 18:19:29	3:28:49
8	RPE differentiation	8 to 5	R10_200207AM_d8	2020-02-07 10:49:46	2020-02-07 14:21:17	3:31:31
8	RPE differentiation	4 to 1	R10_200207PM_d8	2020-02-07 14:41:38	2020-02-07 18:19:31	3:37:53
9	RPE differentiation	1 to 4	R10_200208AM_d9	2020-02-08 12:17:03	2020-02-08 15:47:23	3:30:20
9	RPE differentiation	5 to 8	R10_200208PM_d9	2020-02-08 16:07:54	2020-02-08 19:39:30	3:31:36
10	RPE differentiation	8 to 5	R10_200209AM_d10	2020-02-09 12:12:10	2020-02-09 15:42:21	3:30:11
10	RPE differentiation	4 to 1	R10_200209PM_d10	2020-02-09 16:19:02	2020-02-09 19:44:19	3:25:17
11	RPE differentiation	1 to 4	R10_200210AM_d11	2020-02-10 11:04:03	2020-02-10 14:20:52	3:16:49
11	RPE differentiation	5 to 8	R10_200210PM_d11	2020-02-10 14:38:01	2020-02-10 17:59:34	3:21:33
12	RPE differentiation	8 to 5	R10_200211AM_d12	2020-02-11 10:29:51	2020-02-11 13:49:54	3:20:03
12	RPE differentiation	4 to 1	R10_200211PM_d12	2020-02-11 14:06:17	2020-02-11 17:26:52	3:20:35
13	RPE differentiation	1 to 4	R10_200212AM_d13	2020-02-12 11:13:48	2020-02-12 14:30:45	3:16:57
13	RPE differentiation	5 to 8	R10_200212PM_d13	2020-02-12 14:56:06	2020-02-12 18:14:33	3:18:27
14	RPE differentiation	8 to 5	R10_200213AM_d14	2020-02-13 10:48:58	2020-02-13 14:01:34	3:12:36
14	RPE differentiation	4 to 1	R10_200213PM_d14	2020-02-13 14:19:19	2020-02-13 17:31:45	3:12:26
15	RPE differentiation	1 to 4	R10_200214AM_d15	2020-02-14 10:56:44	2020-02-14 14:10:38	3:13:54
15	RPE differentiation	5 to 8	R10_200214PM_d15	2020-02-14 14:38:41	2020-02-14 17:50:15	3:11:34
16	RPE differentiation	8 to 5	R10_200215AM_d16	2020-02-15 12:00:36	2020-02-15 15:06:18	3:05:42
16	RPE differentiation	4 to 1	R10_200215PM_d16	2020-02-15 15:27:23	2020-02-15 18:31:39	3:04:16
17	RPE differentiation	1 to 4	R10_200216AM_d17	2020-02-16 11:21:51	2020-02-16 14:20:40	2:58:49
17	RPE differentiation	5 to 8	R10_200216PM_d17	2020-02-16 15:26:58	2020-02-16 18:21:43	2:54:45
18	RPE differentiation	8 to 5	R10_200217AM_d18	2020-02-17 10:36:42	2020-02-17 13:09:04	2:32:22
18	RPE differentiation	4 to 1	R10_200217PM_d18	2020-02-17 13:22:34	2020-02-17 15:57:49	2:35:15
19	RPE differentiation	1 to 4	R10_200218AM_d19	2020-02-18 11:04:49	2020-02-18 13:36:47	2:31:58
19	RPE differentiation	5 to 8	R10_200218PM_d19	2020-02-18 14:01:25	2020-02-18 16:31:50	2:30:25
20	RPE differentiation	8 to 5	R10_200219AM_d20	2020-02-19 10:48:18	2020-02-19 12:25:46	1:37:28
20	RPE differentiation	4 to 1	R10_200219PM_d20	2020-02-19 12:32:42	2020-02-19 14:12:55	1:40:13
21	RPE differentiation	1 to 4	R10_200220AM_d21	2020-02-20 11:00:04	2020-02-20 12:39:46	1:39:42
21	RPE differentiation	5 to 8	R10_200220PM_d21	2020-02-20 12:57:08	2020-02-20 14:35:49	1:38:41
22	RPE differentiation	8 to 5	R10_200221AM_d22	2020-02-21 11:15:01	2020-02-21 12:53:42	1:38:41
22	RPE differentiation	4 to 1	R10_200221PM_d22	2020-02-21 13:19:54	2020-02-21 14:58:56	1:39:02
23	RPE differentiation	1 to 4	R10_200222AM_d23	2020-02-22 11:14:10	2020-02-22 12:53:50	1:39:40
23	RPE differentiation	5 to 8	R10_200222PM_d23	2020-02-22 13:02:20	2020-02-22 14:39:52	1:37:32
24	RPE differentiation	8 to 5	R10_200223AM_d24	2020-02-23 11:54:56	2020-02-23 13:32:46	1:37:50
24	RPE differentiation	4 to 1	R10_200223PM_d24	2020-02-23 13:56:51	2020-02-23 15:36:55	1:40:04
25	RPE differentiation	1 to 4	R10_200224AM_d25	2020-02-24 11:47:49	2020-02-24 13:28:01	1:40:12
25	RPE differentiation	5 to 8	R10_200224PM_d25	2020-02-24 13:48:53	2020-02-24 15:22:06	1:33:13		EVOS撮像skip事象
26	RPE maintenance	8 to 5	R10_200225AM_d26	2020-02-25 10:51:04	2020-02-25 12:28:52	1:37:48
26	RPE maintenance	4 to 1	R10_200225PM_d26	2020-02-25 12:50:19	2020-02-25 14:29:00	1:38:41
28	RPE maintenance	1 to 4	R10_200227AM_d28	2020-02-27 10:47:29	2020-02-27 12:27:10	1:39:41
28	RPE maintenance	5 to 8	R10_200227PM_d28	2020-02-27 13:20:27	2020-02-27 14:58:11	1:37:44
30	RPE maintenance	8 to 5	R10_200229AM_d30	2020-02-29 11:09:03	2020-02-29 12:47:54	1:38:51		EVOS撮像skip事象
30	RPE maintenance	4 to 1	R10_200229PM_d30	2020-02-29 12:52:16	2020-02-29 14:31:08	1:38:52
32	RPE maintenance	1 to 4	R10_200302AM_d32	2020-03-02 10:55:35	2020-03-02 12:35:13	1:39:38
32	RPE maintenance	5 to 8	R10_200302PM_d32	2020-03-02 12:40:00	2020-03-02 14:18:08	1:38:08
							8 days, 12:22:50

## Sheet: R11
DDay	Category	Plate	Job Name	Start Time	Finish Time	Duration	チェック用	Error raw	Error 抽象化	エラーコマンド番号
-7	Seeding	4 to 1, 8 to 5	R11_200319_d-7	2020-03-19 12:08:21	2020-03-19 13:56:49	1:48:28
-6	Preconditioning	1 to 4	R11_200320AM_d-6	2020-03-20 12:21:02	2020-03-20 14:40:31	2:19:29
-6	Preconditioning	5 to 8	R11_200320PM_d-6	2020-03-20 14:52:24	2020-03-20 17:11:03	2:18:39
-5	Preconditioning	8 to 5	R11_200321AM_d-5	2020-03-21 11:21:43	2020-03-21 13:49:58	2:28:15
-5	Preconditioning	4 to 1	R11_200321PM_d-5	2020-03-21 14:39:40	2020-03-21 17:08:07	2:28:27
-4	Preconditioning	1 to 4	R11_200322AM_d-4	2020-03-22 11:41:00	2020-03-22 14:09:42	2:28:42
-4	Preconditioning	5 to 8	R11_200322PM_d-4	2020-03-22 14:24:09	2020-03-22 16:52:43	2:28:34
-3	Preconditioning	8 to 5	R11_200323AM_d-3	2020-03-23 11:02:28	2020-03-23 13:30:41	2:28:13
-3	Preconditioning	4 to 1	R11_200323PM_d-3	2020-03-23 13:45:00	2020-03-23 16:13:54	2:28:54
-2	Preconditioning	1 to 4	R11_200324AM_d-2	2020-03-24 10:54:41	2020-03-24 13:22:54	2:28:13
-2	Preconditioning	5 to 8	R11_200324PM_d-2	2020-03-24 13:35:32	2020-03-24 16:03:37	2:28:05
-1	Preconditioning	8 to 5	R11_200325AM_d-1	2020-03-25 10:51:01	2020-03-25 13:19:33	2:28:32
-1	Preconditioning	4 to 1	R11_200325PM_d-1	2020-03-25 13:32:00	2020-03-25 16:01:31	2:29:31
0	Passage	1 to 4	R11_200326AM_d00_skipEVOS	2020-03-26 09:50:33	2020-03-26 14:54:29	5:03:56
0	Passage	5 to 8	R11_200326PM_d00_skipEVOS	2020-03-26 15:58:43	2020-03-26 21:02:35	5:03:52
1	RPE differentiation	1 to 4	R11_200327AM_d1	2020-03-27 11:03:34	2020-03-27 14:32:45	3:29:11
1	RPE differentiation	5 to 8	R11_200327PM_d1	2020-03-27 14:45:31	2020-03-27 18:13:14	3:27:43
2	RPE differentiation	8 to 5	R11_200328AM_d2	2020-03-28 11:09:54	2020-03-28 14:36:49	3:26:55
2	RPE differentiation	4 to 1	R11_200328PM_d2	2020-03-28 15:09:07	2020-03-28 18:36:40	3:27:33
3	RPE differentiation	1 to 4	R11_200329AM_d3	2020-03-29 11:18:54	2020-03-29 14:44:47	3:25:53
3	RPE differentiation	5 to 8	R11_200329PM_d3	2020-03-29 15:10:41	2020-03-29 18:36:30	3:25:49
4	RPE differentiation	8 to 5	R11_200330AM_d4	2020-03-30 10:58:35	2020-03-30 14:16:32	3:17:57
4	RPE differentiation	4 to 1	R11_200330PM_d4	2020-03-30 14:30:35	2020-03-30 17:49:07	3:18:32
5	RPE differentiation	1 to 4	R11_200331AM_d5	2020-03-31 10:42:54	2020-03-31 13:54:05	3:11:11
5	RPE differentiation	5 to 8	R11_200331PM_d5	2020-03-31 14:09:58	2020-03-31 17:20:02	3:10:04
6	RPE differentiation	8 to 5	R11_200401AM_d6	2020-04-01 10:42:30	2020-04-01 13:51:42	3:09:12
6	RPE differentiation	4 to 1	R11_200401PM_d6	2020-04-01 14:03:21	2020-04-01 17:13:11	3:09:50
7	RPE differentiation	1 to 4	R11_200402AM_d7	2020-04-02 10:45:16	2020-04-02 13:58:42	3:13:26
7	RPE differentiation	5 to 8	R11_200402PM_d7	2020-04-02 14:13:40	2020-04-02 17:26:39	3:12:59
8	RPE differentiation	8 to 5	R11_200403AM_d8	2020-04-03 10:57:42	2020-04-03 14:07:54	3:10:12
8	RPE differentiation	4 to 1	R11_200403PM_d8	2020-04-03 14:22:42	2020-04-03 17:32:11	3:09:29
9	RPE differentiation	1 to 4	R11_200404AM_d9	2020-04-04 11:39:21	2020-04-04 14:50:54	3:11:33
9	RPE differentiation	5 to 8	R11_200404PM_d9	2020-04-04 15:11:22	2020-04-04 18:22:00	3:10:38
10	RPE differentiation	8 to 5	R11_200405AM_d10	2020-04-05 10:53:44	2020-04-05 14:01:48	3:08:04
10	RPE differentiation	4 to 1	R11_200405PM_d10	2020-04-05 14:19:51	2020-04-05 17:27:56	3:08:05
11	RPE differentiation	1 to 4	R11_200406AM_d11	2020-04-06 10:44:01	2020-04-06 13:50:03	3:06:02
11	RPE differentiation	5 to 8	R11_200406PM_d11	2020-04-06 14:03:00	2020-04-06 17:08:10	3:05:10
12	RPE differentiation	8 to 5	R11_200407AM_d12	2020-04-07 10:35:01	2020-04-07 13:32:56	2:57:55
12	RPE differentiation	4 to 1	R11_200407PM_d12	2020-04-07 14:04:51	2020-04-07 17:01:06	2:56:15
13	RPE differentiation	1 to 4	R11_200408AM_d13	2020-04-08 11:27:10	2020-04-08 14:21:01	2:53:51
13	RPE differentiation	5 to 8	R11_200408PM_d13	2020-04-08 15:04:27	2020-04-08 17:58:07	2:53:40
14	RPE differentiation	8 to 5	R11_200409AM_d14	2020-04-09 10:48:02	2020-04-09 13:37:57	2:49:55
14	RPE differentiation	4 to 1	R11_200409PM_d14	2020-04-09 13:49:26	2020-04-09 16:40:07	2:50:41
15	RPE differentiation	1 to 4	R11_200410AM_d15	2020-04-10 10:39:41	2020-04-10 13:35:35	2:55:54		Date/Time:2020/04/10 11:33:37, Message:Minor alarm occurred., Mode:standard, Protocol:R11_200410AM_d15, Minor alarm:L1356:50mlﾁｭｰﾌﾞ開栓失敗, Command Name:TRANSFER_TU50_MP6, (X,Y):(2,112)（100％KSRチューブ蓋破損のため）	Defective labware error	#112
15	RPE differentiation	5 to 8	R11_200410PM_d15	2020-04-10 13:47:27	2020-04-10 16:37:57	2:50:30
16	RPE differentiation	8 to 5	R11_200411AM_d16	2020-04-11 11:07:36	2020-04-11 13:55:56	2:48:20
16	RPE differentiation	4 to 1	R11_200411PM_d16	2020-04-11 14:24:46	2020-04-11 17:13:04	2:48:18
17	RPE differentiation	1 to 4	R11_200412AM_d17	2020-04-12 10:59:29	2020-04-12 13:44:04	2:44:35
17	RPE differentiation	5 to 8	R11_200412PM_d17	2020-04-12 14:00:25	2020-04-12 16:45:06	2:44:41
18	RPE differentiation	8 to 5	R11_200413AM_d18	2020-04-13 11:17:36	2020-04-13 13:55:07	2:37:31
18	RPE differentiation	4 to 1	R11_200413PM_d18	2020-04-13 14:17:37	2020-04-13 16:54:16	2:36:39
19	RPE differentiation	1 to 4	R11_200414AM_d19	2020-04-14 09:59:29	2020-04-14 12:27:42	2:28:13
19	RPE differentiation	5 to 8	R11_200414PM_d19	2020-04-14 12:40:42	2020-04-14 15:09:17	2:28:35
20	RPE differentiation	8 to 5	R11_200415AM_d20	2020-04-15 12:34:37	2020-04-15 14:13:10	1:38:33
20	RPE differentiation	4 to 1	R11_200415PM_d20	2020-04-15 14:48:03	2020-04-15 16:24:19	1:36:16
21	RPE differentiation	1 to 4	R11_200416AM_d21	2020-04-16 11:04:38	2020-04-16 12:41:13	1:36:35
21	RPE differentiation	5 to 8	R11_200416PM_d21	2020-04-16 13:16:09	2020-04-16 14:52:17	1:36:08
22	RPE differentiation	8 to 5	R11_200417AM_d22	2020-04-17 10:50:08	2020-04-17 12:27:07	1:36:59
22	RPE differentiation	4 to 1	R11_200417PM_d22	2020-04-17 12:45:59	2020-04-17 14:22:17	1:36:18
23	RPE differentiation	1 to 4	R11_200418AM_d23	2020-04-18 11:04:36	2020-04-18 12:41:11	1:36:35
23	RPE differentiation	5 to 8	R11_200418PM_d23	2020-04-18 13:16:05	2020-04-18 14:52:21	1:36:16
24	RPE differentiation	8 to 5	R11_200419AM_d24	2020-04-19 10:58:06	2020-04-19 12:36:06	1:38:00
24	RPE differentiation	4 to 1	R11_200419PM_d24	2020-04-19 12:41:16	2020-04-19 14:19:30	1:38:14
25	RPE differentiation	1 to 4	R11_200420AM_d25	2020-04-20 11:04:36	2020-04-20 14:01:25	2:56:49		Date/Time:2020/04/20 12:04:43, Message:Major alarm occurred., Mode:reservation, Protocol:R11_200420AM_d25, Major alarm:8001[0]: Please Check Scope, Minor alarm:L1175:ﾛﾎﾞｯﾄにｱﾗｰﾑ(軽故障)が発生しました, Command Name:GETIMAGE_MP6, (X,Y):(4,36)（Capclick動作不良）	Microscope error	#36
25	RPE differentiation	5 to 8	R11_200420PM_d25	2020-04-20 14:36:20	2020-04-20 16:13:27	1:37:07
26	RPE maintenance	8 to 5	R11_200421AM_d26	2020-04-21 11:06:08	2020-04-21 12:39:17	1:33:09		EVOS撮像skip事象
26	RPE maintenance	4 to 1	R11_200421PM_d26	2020-04-21 12:42:56	2020-04-21 14:19:57	1:37:01
28	RPE maintenance	1 to 4	R11_200423AM_d28	2020-04-23 11:12:10	2020-04-23 12:51:25	1:39:15
28	RPE maintenance	5 to 8	R11_200423PM_d28	2020-04-23 12:54:42	2020-04-23 14:31:29	1:36:47
30	RPE maintenance	8 to 5	R11_200425AM_d30	2020-04-25 11:45:49	2020-04-25 13:23:25	1:37:36
30	RPE maintenance	4 to 1	R11_200425PM_d30	2020-04-25 13:28:38	2020-04-25 15:06:25	1:37:47
32	RPE maintenance	1 to 4	R11_200427AM_d32	2020-04-27 10:43:29	2020-04-27 12:22:34	1:39:05
32	RPE maintenance	5 to 8	R11_200427PM_d32	2020-04-27 12:25:00	2020-04-27 14:01:32	1:36:32
							7 days, 23:01:53
