# Supplementary figures and images for: Robotic search for optimal cell culture in regenerative medicine
Source: eLife journal article supplement (doi:10.7554/elife.77007), 2022-05-18

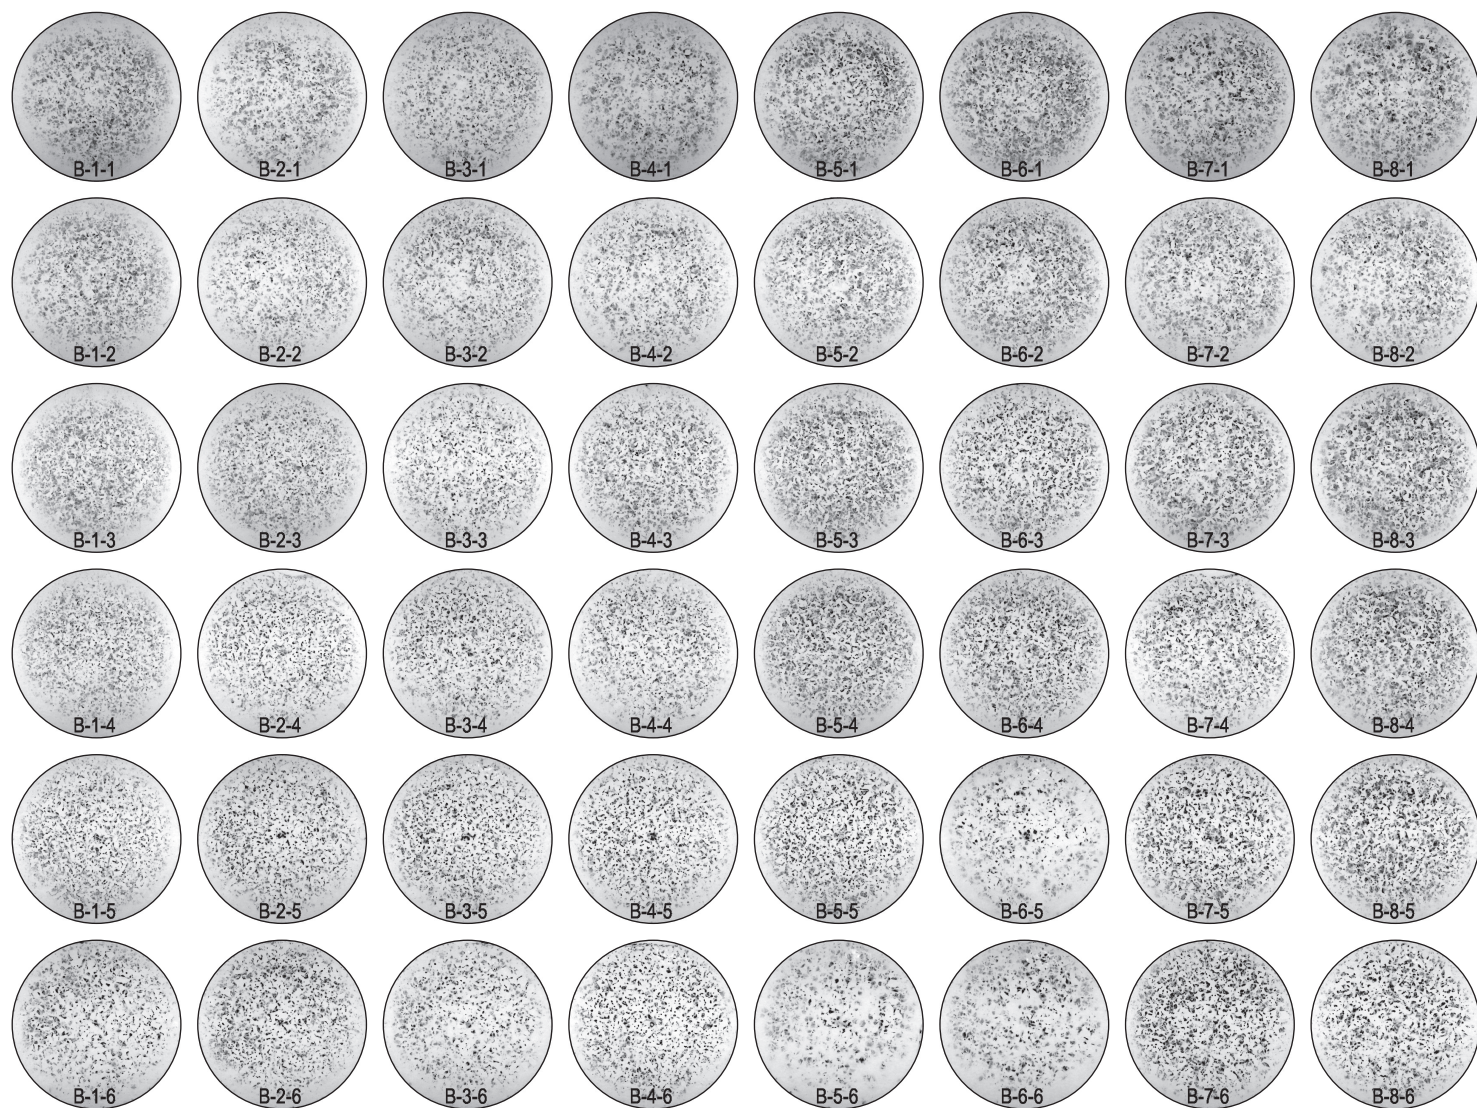

Supplement: fig2-data1 [file Figure_2_source_data_1.pdf › Figure_2_source_data_1.pdf]

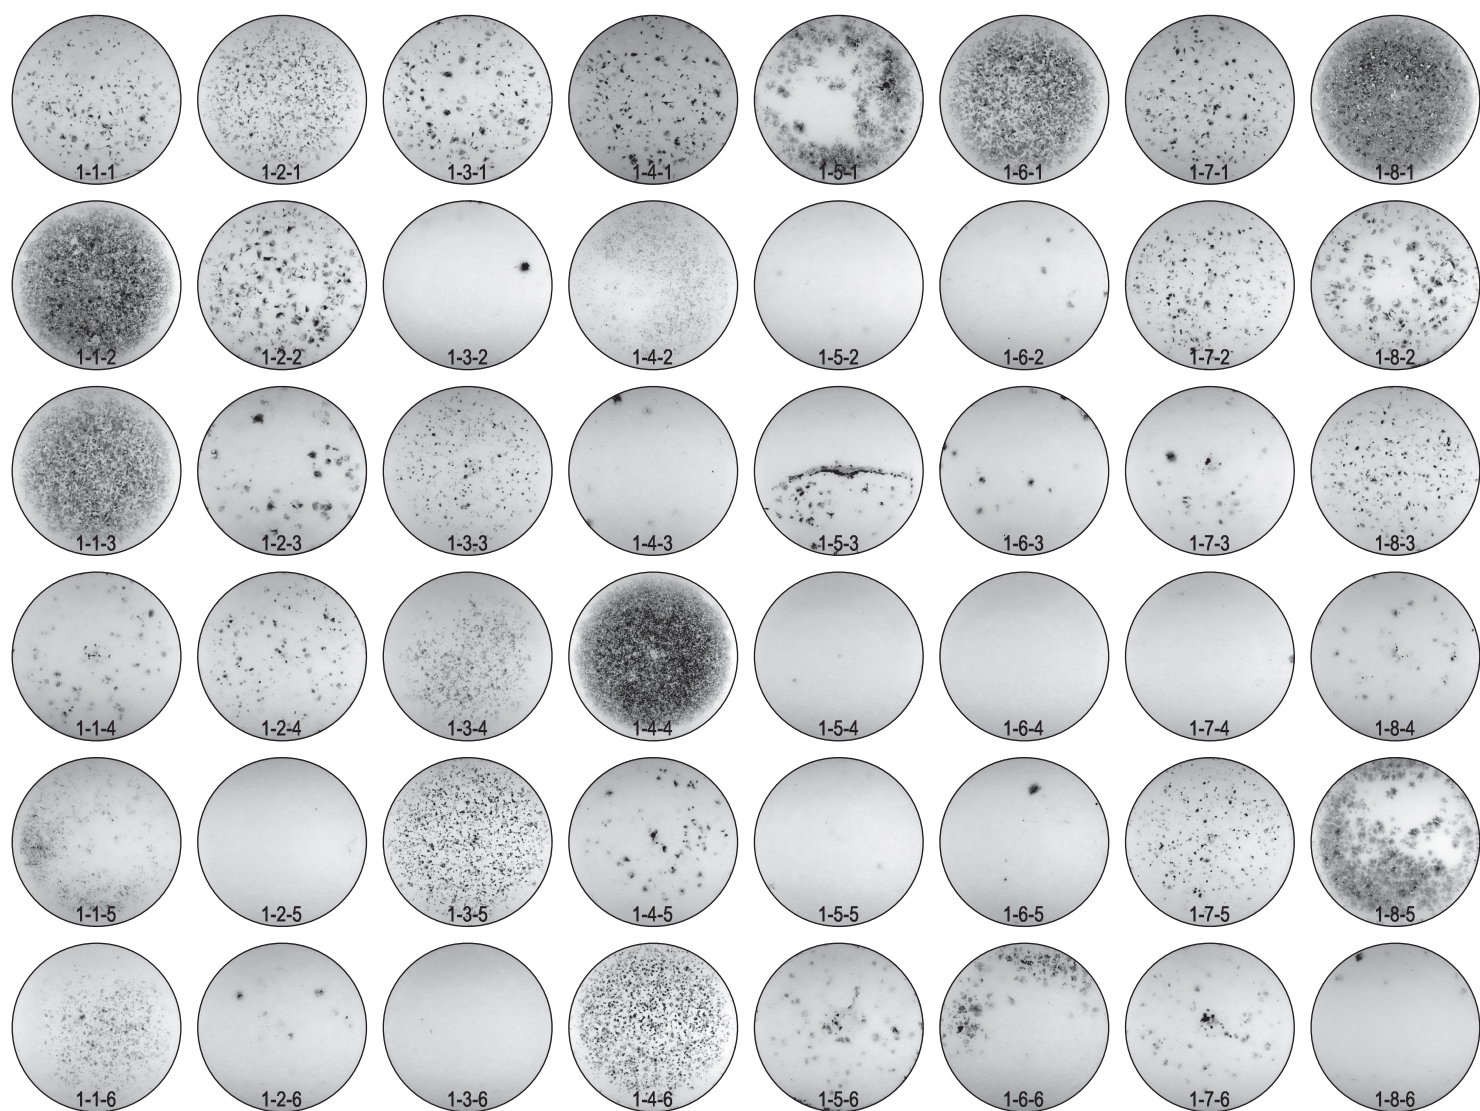

Supplement: fig4-data1 [file elife-77007-fig4-data1-v1.zip]

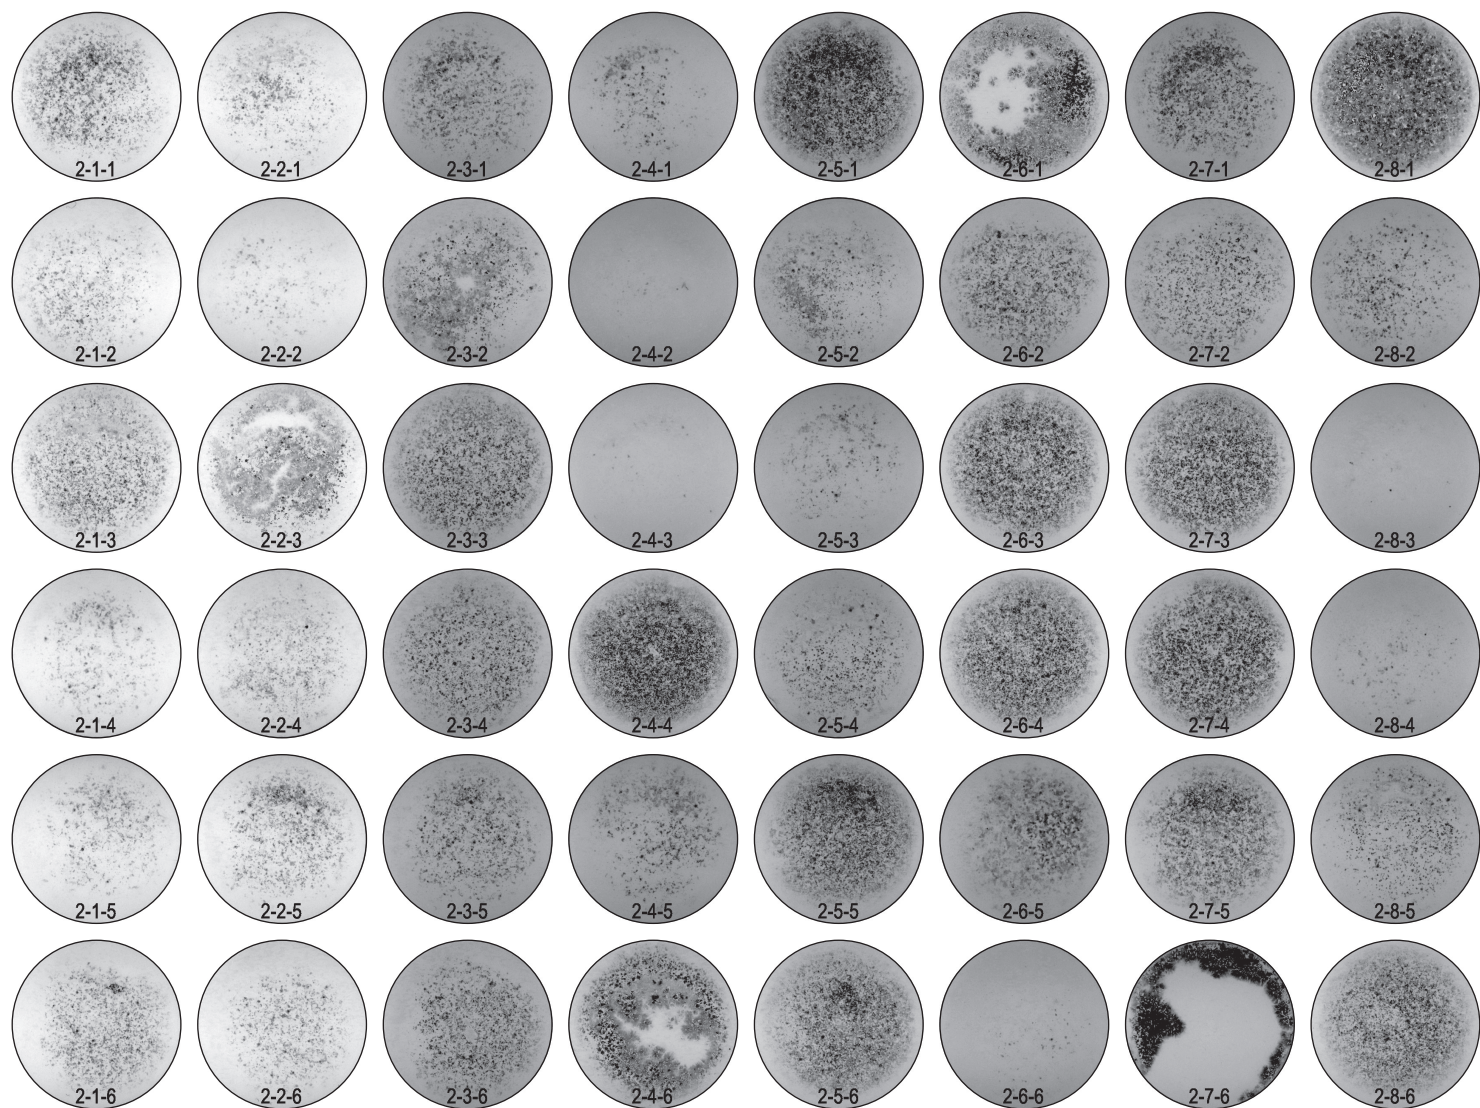

Supplement: fig4-data2 [file elife-77007-fig4-data2-v1.zip]

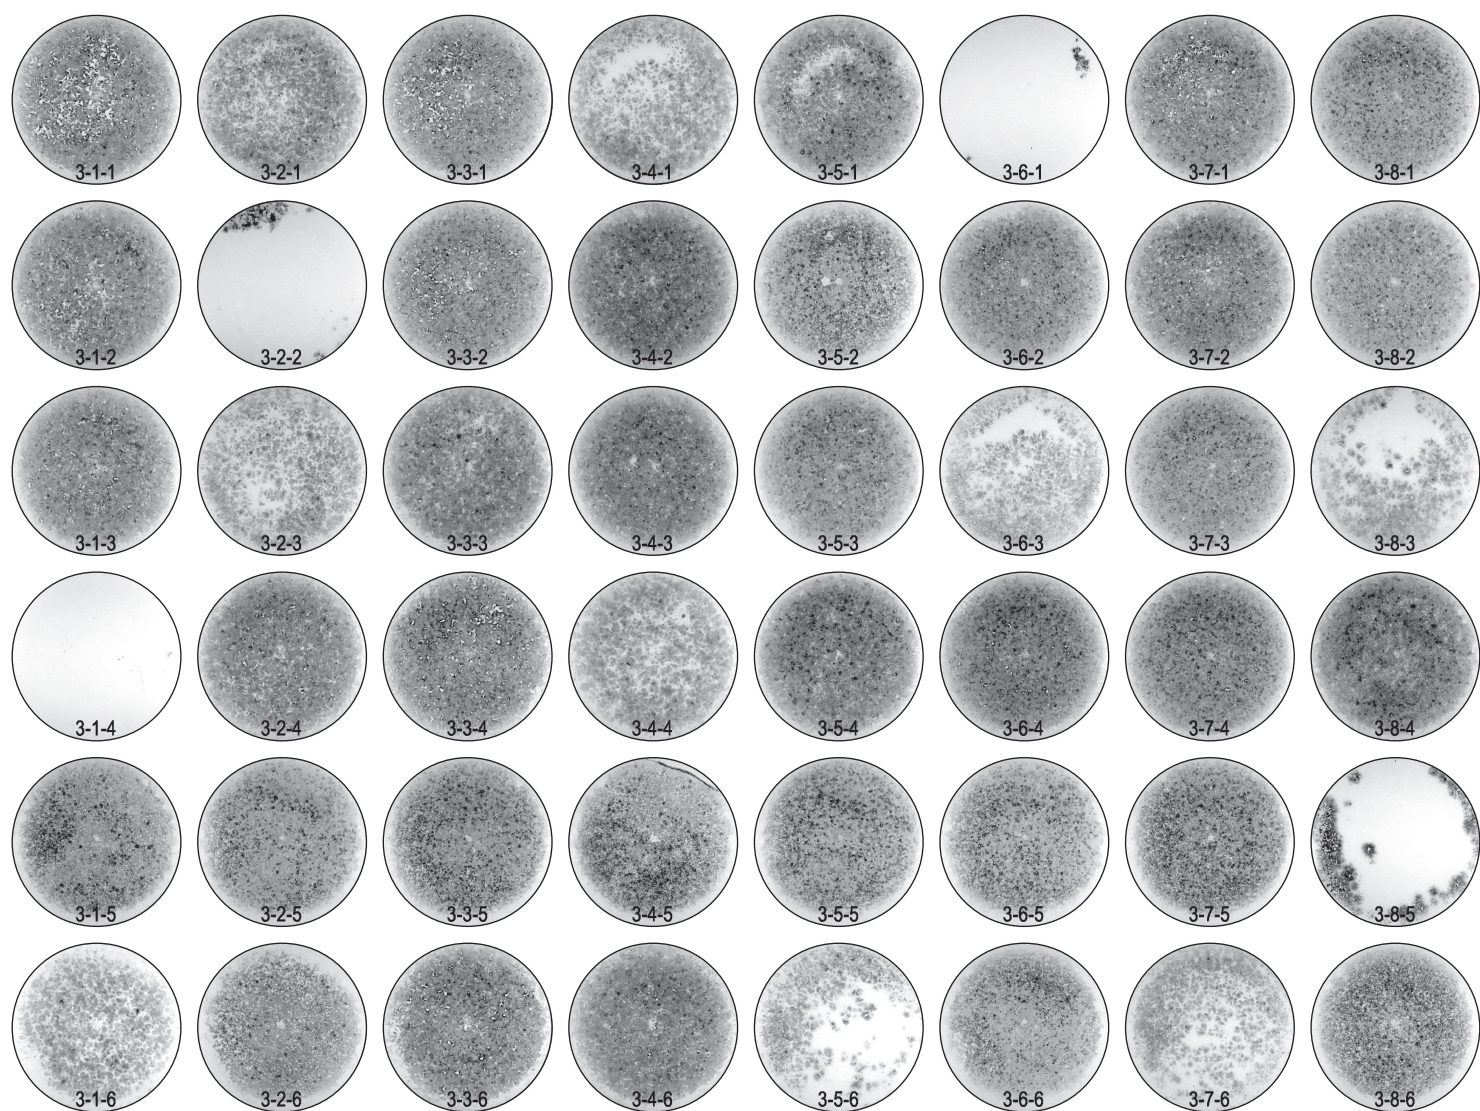

Supplement: fig4-data3 [file elife-77007-fig4-data3-v1.zip]

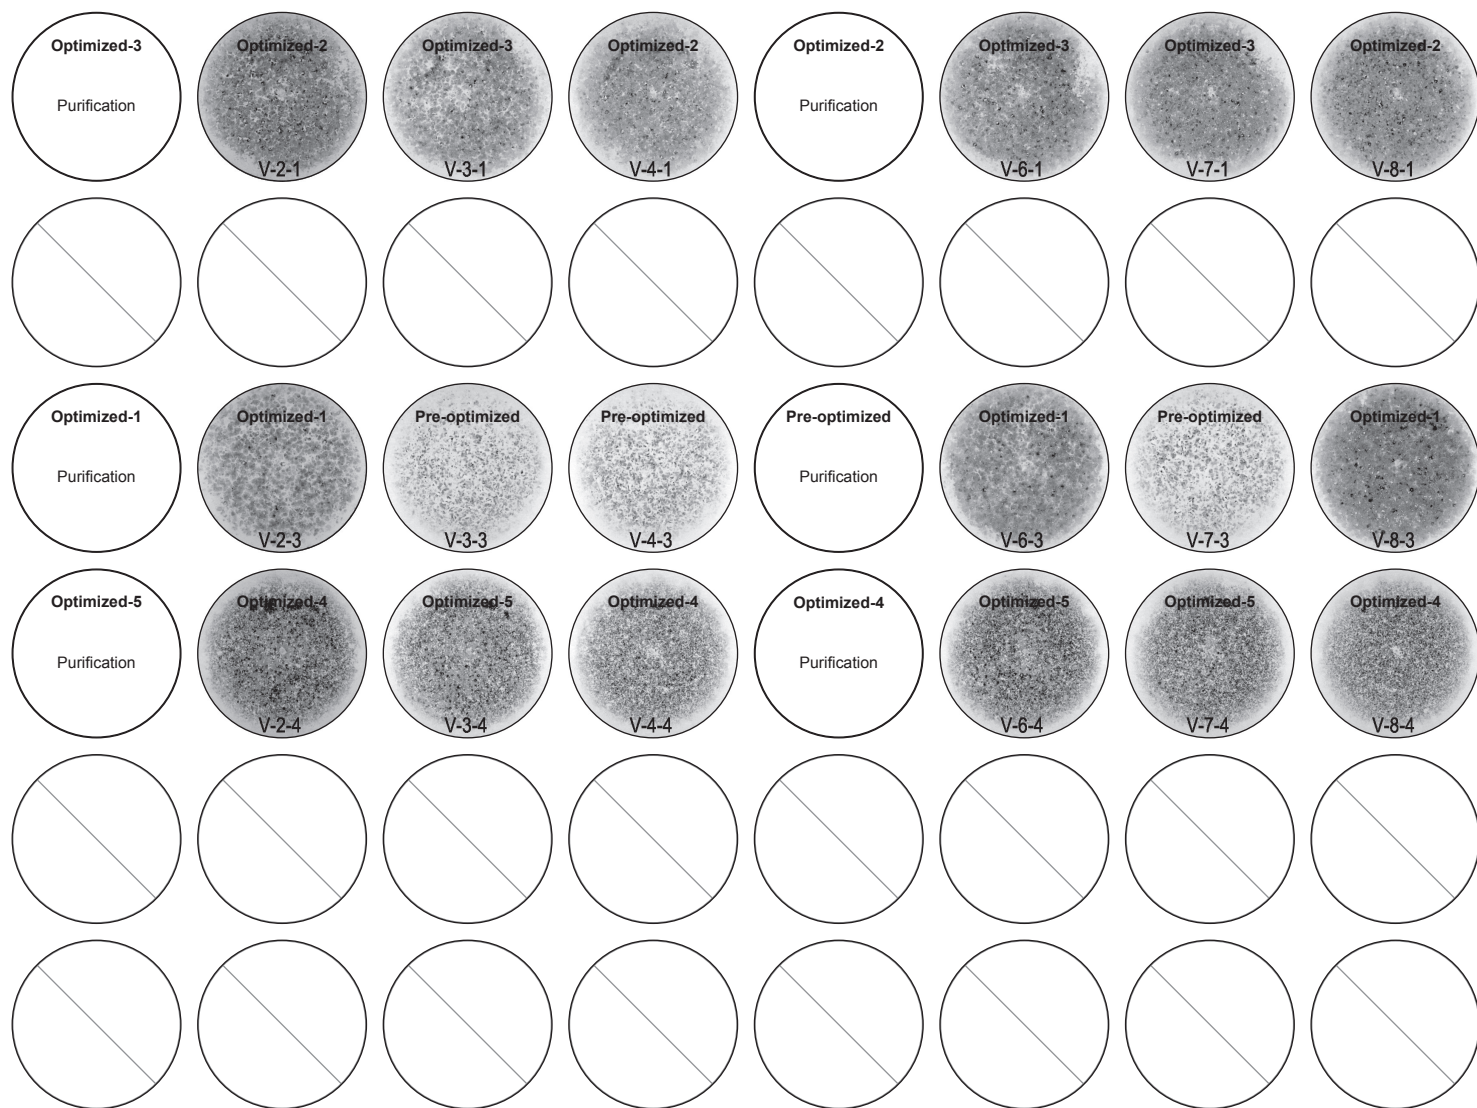

Supplement: fig5-data1 [file Figure_5_source_data_1.pdf › Figure_5_source_data_1.pdf]
